# Supplementary material for: QTL Mapping and Phenotypic Variation for Seedling Vigour Traits in Barley (Hordeum vulgare L.)
Source: MDPI journal article supplement (doi:10.3390/plants10061149), 2021-06-04
Supplement: s1 [file s1]

## Chr. 1H

BPB-7963

TGCAGTACCATACTTTTCCTCCAAATAGTTCTTCTTTTGCATGTCCTTGAAATTCCTTGTTTTCCAAAAGACACTAATGTTG  
GAATAAACACGATGCGTGGCCTTGTCGGGTGGGACTCGGTGCAATCACCTAATAGTACTAGGATTAAGAATTGGTAAC  
CGTATAAGTTTACTTGTTTGATGATAGCTGCTTTATATACGTAGGTATCCTGTAATATTATGAACCAAAATCAAAGCAAT  
ACAAAGCACAGGACCGACACAGCCGTGTTTCGCCATCACCTCGAGTTTTTCGCGTGTATGTTCTGTTGTGAATGAATTAGCG  
CCGGCGAGATGATCGCTAACTTAGCTGATTAAGCTAGCTACTCGTGTGTGGGTGTCCAGCAGCACTCGATCCACCTATGT  
ATCTGCTTGCTTAGTACTACTACGTGTGTATTTGATTAGTGTGGTAATATATTGCACGTACGTGTGACTCGTCAAGGAA  
CCGACGTGCAACATCTGATCGGGTCTGTGACAACAATTGGTATCTAGAACTTGATTTGTTTGCGTGATTTTCGGAAAGTA  
ATCGAAGAATCATGTCAAACCCGGGCAAGGAGATTGTCGTGGCGGGAGCGGGAGCACCGATGCCGATGGTGGGGGTGTCT  
CAATTCCTCCCGACTGGATCGAGAGGACTACGCACATGAGCGATGAACATGGAGGTCGCGATGGAGGGCGCTGAGTTCTG  
GTAAGCTATCGATCCCGGTGGAGCCAGTACACGAAGGTTGCGGCGAAGTACCGGACGGGTCTGACGGCGTTAACGGTGA  
TCTACTCCGCCATGCCGAAGGATGTGCTGCA

BPB-4293

TGCAGGACGAGGGGCACCGGGAGGGGAAGGGGGTGGAGCCCCCGCAACTGGTCGCGATGGCATAATATGTCCGCCGTCTC  
CGAATGTTGGCAAGTATGTCGTGCGATGATCCCATGGCGCTTGAAGCCACGGCCACGGGAACATATGTCCACCATCACAT  
GGCGGATGCATCGGCTGGGGAGGGCACCATTTGTGGTTGCATAGGTTGGGGCATTGCCGGCGGTAGCAACCATGATGGTGG  
ATGTGGCCAGCCCCCAGCCCCCCTTGATTTCTAAGTCTTCCGCTGATGAGGGGTCTTCATTGTGATTGATCC  
AATCACCAGTTCCATTGCCCCGATCTTCTGTATCAGTGGATTCCCTCTTTTTCATCTGGACCTTCTTTGCCAATCTCAAAC  
GGGCCAACATGCTCTACCATAATCCATACGATGGTAATTAGGTCACCGCCACGGCCGAGTTGCCTCGCATGGGATTCTCT  
GCTGCATCGGGTGGCTGCATACAACAGCTTATCCACCCAAATCTTGAAGACGAGCTCCAAAAGTTTCGGCATCTTCAAAC  
CATCAGCCTTGAGCAGCTCCAGAGCAATATTAGCACCGTCTGAGACCAGACGAGTTCTACTCTTACCTAAACCCCACTCG  
TCGTCTCCCTTCTTGTCTTTGCCAGCATCCTTGCAAGCTTCTCCTCTGCA

BPB-7697

TGCAGTTCTTGATGCTTTTGCAACTTACCAAAAGTTTTTGGTATTGATCCCGATATTTGGTTCTGAAACAAGCCTAAATA  
TTCGAGGTTTCATCAGATCGCCAATTTCCCTCGGGGATGGAACCGGTTATTTGATTTTTCAAAGAGGTATAGTACTACTAGCT  
TGGTAACATTTCCTAAGCTGTCAGGAATAGAGCCAGATATTTGGTTGATGGACAAGTCTAAATTTCTGGAGATTTCATTAGA  
TTGCCAAACTCTCTGGGGATGGAACCAGATATCTTATTTTCAAAGAGGTGTAGTAGTAATAGCTTGGTAATATTTCCCTAA  
GCTGTTCAGGAATAGAGCCAGATATTTGGTTGTGAGCCAAGTCTAACTTCTGGAGATTTCAGCAAGTAGCCCAATTTCTGAAG  
GTATTGTGCCTGTGATATGATTTGTATAGAGAAGTTCATTGAGCATAGTGAGGTTGCCTACTTCTGCCGGTATTGAA  
CCTGTGATTTGATTTCTATAGAGACCAAGTTGGTTTAGCATAGTGAGGTTGCCATTGCTGGGGGTATTGAACCTGTGAT  
TTGATTTTTCAAAGAGAAAAAATTGGTTCAACTTTGTAAGATTGGTTATGAAGACTGGAATTGGACCTGACAAATCATTTTC  
CAGCAAGATGAAGATTTTGCAATGGACTAGCCTGCCTAGTTCTTGGGGTATAGGCCCTGAAAGTTGATTATGAAACACG  
TACAAAGTATTTAGTTGGGTCAGATTTCCAAGGGTTTTTGGTATCATGCCGCCTAAGGTGTTGTTGCTTAGCTGTAGAAG  
TTGTAGGTTGACAAGCCTTCCAATCTCTTCAGGAATGGGACCTGATACCATGGTTTGGTGAATGATAAGATCAGTTAACA  
TTGTTAGGTTACACAGAGACACAGGGATATGTCTGTGAGTTTGTAAATGAGAGACCAAGTTGGGTGAGACTCTGCA

BPB-5064

TACGGGTCGATCAAGTTAGGGTTCGCTTGTCTTGTTTGGTTCTCGGCCATGGCGGCGCTAAAGGGCCTCGTCGCCAGCA  
CCCACACGGCACCATGCTACCGAGACATCTCGTGCAGGGCTGCCGAACGACATCGTCGCCGGTGGCCAGTCGGACTGCTC  
GACCATGGCAGCCGCTCGCCATGTTGTTGGCCGGGCGCACTCCTCGACGGTGGCTATTTCATGCGCCAACATGTCATCGCG  
GGCAGCGGGCCAACCTCTCGTGGACGAACGGACGCGCACCAAGACCCCTTCGAAGTGCTCCATTTTGTGCGCACTTGCTCAA  
GCCGGCGCCGGTGTACTCCATGAGACCATGACACTTACGTGATCAGGCTGATTGTAAGACGCATGCTTACATATTCAGCA  
TATACATGTGCATTGTCTAGTTTGGTTGATCGATTCCCTTTAGTCTCATGCTAGCCCTTGATTAGATTAGTATGATGCTTG  
GCCAAACTGTTATATCATTAGTTCAATCTGTAAATACTTAAAGATAATATCTTTTTTTTTTGCAGGTGAAGATAAATATTGT  
TTTCAAAACACTATTTCGGCGATAGGATTTTAATGAAGGAACTAGTACAAGCAGGCTCCAGTGATGACTTGAGCACTTCA  
AAAAGGAGGCAACTGCA

BPB-1322

BPB-8609

TGCAGCAGATGTATCAAAGGGCAGTGAGCATATGTGAATGGTAGAACAGAAATGAACTAACAAAAGAGAATACGGTGTAG  
CCATCTCAGCAACATGCACCACCTAGGAGTAAAGAAGGGAGGCTTCATATATTTATTGAGAATTCGGCATGAATGCATTTAT  
CATGAAAGACTTGCTACATTAGTTTGCCTCGTCAGGAACTTATTTGTTTCAGTACCACAAAGTTGGAGCTACCAATGACA  
TGTTTGCTAGATCAGTTTGTGCTCACGCAACATGGGTGAGAGCATACCTCATAAAGCTTCGTCAAGTAAATCCTTACGAT

TGGTCATTCCAATAAGCAACACGTTATTCAACGCCTCACACCGTCTATCTGTAAATTTGA

BPB-5297

CCNCTAGTAACGGCCGCCAGTGTGCTGGAATTGCCCTTTGGATCCAGTGCAGCATGCCAGCCAGATAAAAAATGGTTTAT  
 TTCCTGTACACATTGCTGCCATGATGAATAGTAGAATTGCCATCCATGTTCTGCTCACACTATACCCTCGTTGCATCGGA  
 TTTCCCTGATAACCAGGGAAGATCCTTCCTTCATATTGCTGCCCAGAACAAGAACCTCCCTTGTAGTAAGATATGCTTGCAG  
 TGTATCGTGTCTGGGATTTTGGATCGATAATGAAGTCGATAATGAACGCTCAGGACGACGATGGCAACACCGCACTACATC  
 TAGCTGTGGATGCTGGGGATCTATCTTCTTTCTGTGCACTGCTGGGGAACCGAGAAGTATTATTAAATATCAGAAATAAC  
 AAGAATCAAACCTCCACTGGATTTGGCATGGAGCAAGAGGAAAGGTTTTTGGCTACGGATGGGTATTAAATCTATATTTCTC  
 TCTCATTTCTCATGTTAGTTTCGTCATATAGCTAGAAGATGTATCCCAGTATCCCACCTTCATTTTTTTTTCAGTAAATATAT  
 ATCCCGCATCTTGATGATTTTTCTTGCAGAATCCGGAACATGTGATGTACAGAACTCTTGTACGTGCCGGCTCTAGTCATG  
 CTAGCTTTTGGAGAGATCGTCTTCAACAACCTTGAATTTAGTGCCACTAGAAAGTCAAGAGGATGAAGGGAAAGATCCA  
 GCAAAAGAAAAAAGAGGATGAAGAGAAAGAAGAGTCAGCTAAAGTGACAGATTCAACTCGGACACTTGGCATTTGGCTC  
 GGTACTCATAGCATCAGTGACATTCCTGCAACCTTACCCTACCTGCACTGGNTCCATCAAGGGCGAATTCTGCANATA  
 TCCATNNNNCTGGCNNNNNTCGAGCATGCATCTAGAGGGCC

BPB-9718

TGCAGCGATAGCCCTTACGGGAGCTATGGCGGCAAGACATCTTTTACGTGGTACTGGTCCGGGGAGGAGGATGAGGATGA  
 CCTTCCTAATGGGTTCGAATGGAGGGACGAGCCTCGACCGAACAAATCAAAGGAAAGAGTTTGGAAACGAGAGCGATGTGG  
 ATGAGGAAGAGGCCCCCTCGTCGCGATGATCTGAAAAGCCATAGGATATCCCTTGGCTTGCCAGCCTTGGGTCCCTTAAAG  
 CTTGATCATATCAAGTCCGCGTAAGTCTTTGAGCATCTGCATAGCATTTGCGAGGATTCTGATAATCGGGCTCCTGATTG  
 GTGTTCTCTTTCTCGATGCTACGTTTCTGCA

BPB-3309

BPB-3249

TGCAGAGGTGTTTCGTTAGCTATTTGCAGTTAGAGAGTGCTCAATATAAGACCTGCATGCCTTTTCTGAATATAGCAGATT  
 TTTTTTCTCAGCAACGAGGTAAATGAAGTGCCTGCCAAATAAAGCATTTAACTAATTTTAGTGCTGACCACACTGAGC  
 TGGTGGTTAGTACCAGTTGAAGGTTGTGTTTAGACTTATATCCTTGGGACAGAATGGAAGGCAAATGGAAAACAAATTTT  
 GGGTTAAACCGGACAGAGGGAAAAGAAAAATGAACAGCCACAAAGACAATGAGTATCTGTTCTTTTTTTTAGGCAATTGGC  
 TAAGAATTGTGCATTGTCTACAACCTGCAAGCAAAGCAAAGACTATACTAAGAGTCTCGCATCGTCTCCGGCTGCAAGCAA  
 AGCAAAGGGAAGCTAGCAGAACTTGGCATGCCCTGCA

BPB-1204

BPB-2664

BPB-5072

TGCAGAAATGCACGCACAAAGAAATCAAGTTACATGCTAATCCAAACATCAGCTCTAGCTCTTGTCAAACGGAGTTCATT  
 CATAGAAGAGTCTTACAAATTGAAGGCAGACATCACATTTCCGGTGGTGTAGCTCCTTGTAGCACAACTTGTGGTATGGC  
 TCTGCGCCTAGCAAGGTGAACCTGGAACACAAAGATAGAGAAAACGGGTGACGGTCACTTTCTATTTCAATGGATCTGTA  
 GCTCAAGGCTTAAAGGGAGTGTAGGATGGTCACCTCAGTCTCACGGATAGGGTGGGTGCAGGAAGAGCAACGGAAGCACT  
 GAGGATGCCAGTACATCCCCATGCAGCTCAAGTAATGGCCATGTCCAACCTCATGCTTGCAGCCACCACAGACCCTGCA

BPB-2055

TGCAGCATACCAACATGATAAGAATGGTTTGTACCTGTACATGTCGCTGCCTTGATGCATAGGAAAGTTGCCATCCTTA  
 TTCTCCTCGAAAGATGCGGTGGTTGCCCTCGCTCTTCTTGATAAGCAGGGTAGATCCTTTCTTTCACATTGCTGTCCAGAGT  
 GAGGCCTATGGTATAGTATGATATGCTTGTCAAGAACCNGTTTTTGGGCCGATACTCAACGCTCGGGACAATGATGGCAA  
 CACCGCATACACCTAGCTGTGGAGGTTGAGGATTTACTCATCGTCTGTTATCTCTTGCAGGAATCCAAAAGTATTATTAA  
 ATGTAAGAAACAACAAGGATCAAACCTCCGCTGGATCTAGCAAGGAACAAGACTCATCTCACAGATTTTTCTATGGACTG  
 GTATTAAATCTAGCTTCCGTTCTCATGCATGCTTCATGCTAGTTGATCTTATAAATGGAAAGATAAACTATATTTCTTC  
 ATTATTTGTGTTTTTCAAGATCCGGAGAACGCAATATACGAGACACTCAGGGATGTCCGAGCTAGGCATGGTAGCTTCTGGA  
 GTGATCATGTTCAACAACCTGCAATTCAGAATCAGTTGTCAAACCTAAAGGGTGAAGAGAATCAATCAGAAGAAGTGGAT  
 GATTTTGGAGATGCATAAGAAGAAAAAGGATGAAGAGAATCAATCAGAAGAAGTGGATGAGTTGGAGAAGCATACGGAAAA

AAAGGATAAAAAAGAAAAAGGAAGCGAACCGTAAGAAAAAAGAGTATGAAAAGAAAAAGAGGTGAACCGTAAGAAAAAAG  
AGGAAGAAGAGAAAAAAGACTCAGATCAAATGAATGATTC AACCCGGACACTTGGCATTTGGCTCGGTACTCATCACAACG  
ATGACATTCGGTGCAACCTTCACAGTACCTGCA

BPB-0487

CCAGTGCAGGGCATGCCAAGTTTCTGCTAGCTTCCCTTTGCTTTGCTTGCAGCCGGAGACGATGCGAGACTCTTAGTATA  
GTCTTTGCTTTGCTTGCAGTTGTAGACAATGCACAATTCTTAGCCAATTGCCTAAAAAAGAACAGATACTCATTTGTCTT  
GTGGGCTGTTTCAATTTTTCTTTTCCCTCTGTCCGGTTTAACCCAAAATTTGTTTTCCATTTGCCTTCCATTCTGTCCCAAG  
GATATAAGTCTAAACACAACCTTCAACTGGTACTAACCACCAGCTCAGTGTGGTCAGCACTAAAATTAGTTTAAATGCTT  
TATTTGGCAGTGCACCTTCATTTACCTCGTTGCTGAGAAAAAAAATCTGCTATATTCAGAAAAGGCATGCAGGTCTTATAT  
TGAGCACTCTCTAACTGCAAAATAGCTAACGAACACCTCTGCACCTGGATCCNTCA

BPB-8973

TGCAGCATACCAACATGATAAGAATGGTTTGTACCTGTACATGTCGCTGCCTTGATGCATAGGAAAGTTGCCATCCTTA  
TTCTCCTCGAAAGATGCGGTGGTTGCCCTCGCTCTTCTTGATAAGCAGGGTAGATCCTTTCTTTCACATTGCTGTCCAGAGT  
GAGGCCATATGGTATAGTACGATATGCTTGTCAAGAACCAGTTTTTTGGGCCGATACTCAACGCTCGGGACAATGATGGCAA  
CACCGCATTACACCTAGCTGTGGAGGTTGAGGATTTACTCATCGTCTGTTATCTCTTGCAGGAATCCAAAAGTATTATTAA  
ATGTAAGAAACAACAAGGATCAAACCTCCGCTGGATCTAGCAAGGAACAAGACTCATCTCACAGATTTTTCTTATGGACTG  
GTATTTAAATCTAGCTTCCGTTCTCATGCATGCTTTCATGCTAGTTGATCTTTATAAACGGAAAGATAAAAATATATTTCTTC  
ATTATTTGTGTTTTTCAAGATCCGGAGAACGCAATATACGAGACACTCAGGGATGTCGGAGCTAGGCATGGTAGCTTCTGGA  
GTGATCATGTTCAACAACCTCTGCATTCAGAATCAGTTGTCAAACCTAAAGGGTGAAGAGAATCAATCAGAAGAAGTGGAT  
GATTTTGGAGATGCATAAGAAGAAAAAGGATGAAGAGAATCAATCAGAAGAAGTGGATGAGTTGGAGAAGCATACGGAAAA  
AAAGGATAAAAAAGAAAAAGGAAGCGAACCGTAAGAAAAAAGAGTATGAAAAGAAAAAGAGGTGAACCGGAAGAAAAAAG  
AGGAAGAAGAGAAAAAAGACTCAGATCAAATGAATGATTC AACCCGGACACTTGGCATTTGGCTCGGTACTCATCACAACG  
ATGACATTCGGTGCAACCTTCACAGTACCTGCA

BPB-8345

TGCAGGGCATGCCAAGTTTCTGCTAGCTTCCCTTTGCTTTGCTTGCAGCCGGAGACGATGCGAGACTCTTAGTATAGTCT  
TTGCTTTGCTTGCAGTTGTAGACAATGCACAATTCTTAGCCAATTGCCTAAAAAAGAACAGATACTCATTTGTCTTTGTGG  
GCTGTTTCAATTTTTCTTTTCCCTCTGTCCGGCTTAACCCAAAATTTGTTTTCCATTTGCCTTCCATTCTGTCCCAAGGATA  
TAAGTCTAAACACAACCTTCAACTGGTACTAACCACCAGCTCAGTGTGGTCAGCACTAAAATTAGTTTAAATGCTTTATTT  
TGGCAGTGCACCTTCATTTACCTCGTTGCTGAGAAAAAAAATCTGCTATATTCAGAAAAGGCATGCAGGTCTTATATTGAG  
CACTCTCTAACTGCAAAATAGCTAACGAACACCTCTGCA

BPB-3579

TGCAGGGCATGCCAAGTTTCTGCTAGCTTCCCTTTGCTTTGCTTGCAGCCGGAGACGATGCAAGACTCTTAGTATAGTCT  
TTGCTTTGCTTGCAGTTGTAGACAATGCACAATTCTTAGCCAATTGCCTAAAAAAGAACAGATACTCATTTGTCTTTGTGG  
GCTGTTTCAATTTTTCTTTTCCCTCTGTCCGGTTTGACCCAAAATTTGTTTTCCATTTGCCTTCCATTCTGTCCCAAGGATA  
TAAGTCTAAACACAACCTTCAACTGGTACTAACCACCAGCTCAGTGTGGTCAGCACTAAAATTAGTTTAAATGCTTTATTT  
TGGCAGTGCACCTTCATTTACCTCGTTGCTGAGAAAAAAAATCTGCTATATTCAGAAAAGGCATGCAGGTCTTATATTGAG  
CACTCTCTAACTGCAAAATAGCTAACGAACACCTCTGCA

BPB-0374

TGCAGAGGTGTTTCGTTAGCTATTTGCAGTTAGAGAGTGCTCAATATAAGACCTGCATGCCTTTTCTGAATATAGCAGATT  
TTTTTTCTCAGCAACGAGGTAAATGAAGTGCACCTGCCAAATAAAGCATTTAAACTAATTTTTAGTGCTGACCACACTGAGC  
TGGTGGTTAGTACCAGTTGAAGGTTGTGTTTAGACTTATATCCTTGGGACAGAATGGAAGGCAAATGGAAAACAAATTTT  
GGGTCAAACCGGACAGAGGGAAAAGAAAAATGAACAGCCCACAAGACAATGAGTATCTGTTCTTTTTTTTAGGCAATTGGC  
TAAGAATTTGTGCATTTGCTTACAACCTGCAAGCAAAGCAAAGACTATACTAAGAGTCTTGCATCGTCTCCGGCTGCAAGCAA  
AGCAAAGGGAAGCTAGCAGAACTTGGCATGCCCTGCACCTGGATCCNTCAAGGGGCNAATTTCTGCAGATATCCATCANAC  
CTGGGCGGCANGCTCGAGCATGCATCTNGANNNCCAATTCGCCCTATAGTGAGTCGTANTACAATTCACCTGGCCGTCGTT  
TTACAACGTCGN

BPB-5201

TGCAGATGTACAAAATGCCGTCATCAACCATATGTGTGGGCAGCACGGTCACATCATAGTGGCAAGGCAAGAGCAGCAGG  
CCAGCACCCAGAAAACACAGTAGTTCCACCTTCCCTGTCTAATCGCGGCAAACACGGTCACAGTCGTAGAAGTGATGGAT  
AATTTGATCCTTTTTAAGAATGTATTTTGTCTGATCCCTCCCTCGACATTACCAACCGGCAAGGCAGCTTGTTTTTTATCCG  
AGAGATTATTTAGTCTTTGACGCAAGTTGGTGATTTATTTGAAGAGATGAACACAGCTAGCTGCCGTCGATGATCCATAGCT  
GCGGTAGATTATTTTTTAAAACTCAATCTAAAACCTAATCCCAGTCGGCACTGCTACTGTGCTTGTTTATAGTTTTTCAA  
CGAGGCCGGATCTTGGACATTGATTTTCTTGCATCACCACCTTACCAGTATATTACTTGTATGGCATTAGTCATTAGAA

ACCGTAACTATACATGCATACGTACCGGTGCAGTTGTGAGCTTGACGGGCAACCGCTCCAAATGATGATTAGAGGGAGAG  
GACGATGCTGCACTGCTGCTTCCGCCTCTGTTTGTGCGGTACTTAGCGTATGTACGTACGTTCTTCTTCAAGTTAAAAAC  
ACAATCTCACAGATTTCGGGTCTTGGTCTCTTGAATAAGCATATTTCTAGGAACACATACCACGACACGACAGATAGCAGT  
TCCAAAAAATATATTAAAACTATTATTCTGACTTCGTACTTAACTTGCTAACGAACCTAAACTGATTTCGTCTCTTTTCTA  
TATTTACCTGATTTTCGGACGCCCCGGCTACAACCCGCTCGGTGGTGGCAGCCTGCA

BPB-9414

TGCAGCATACCAACATAATAAGAATGGTTTGTACCTGTACNNGTCGCTGCCTTGATGCATAGGAAAGTTGCCATCCTTA  
TTCTCCTCGAAAGATGCGGTGGTTGCCCTCGCTCTTCTTGATAAGCAGGGTAGATCCTTTCTTTCACATTGCTGTCCAGAGT  
GAGGCCATATGGTATAGTACGATATGCTTGTCAAGAACCAGTTTTTGGGCGGATACTCAACGCTCGGGACAATGATGGCAG  
CACCAGATTACACCTAGCTGTGGAGGTTGAGGATTTACTCATCGTCTGTTATCTCTTGCAGGAATCCAAAAGTATTATTAA  
ATGTAAGAAACAACAAGGATCAAACCTCCGCTGGATCTAGCAAGGAACAAGACTCATCTCACAGATTTTTCTTATGGACTG  
GTATTAAATCTAGCTTCCGTTCTCATGCATGCTTCATGCTAGTTGATCTTATAAATGGAAAGATAAACTATATTTCTTC  
ATTATTGTGTTTTTCAGAAATCCGGAGAACGCAATATACGAGACACTCAGGGATGTCGGAGCTAGGCATGGTAGCTTCTGGA  
GTGATCATGTTCAACAACCTCTGCATTCAAGATCAGTTGTCAAACCTAAAGGGTGAAGAGAATCAATCAGAAGAAGTGGAT  
GATTTTGGAGATGCATAAGAAGAAAAAGGATGAAGAGAATCAATCAGAAGAAGTGGATGAGTTGGAGAAGCATACGGAAAA  
AAAGGATAAAAAAGAAAAAGGAAGCGAACCGTAAGAAAAAAGAGTATGAAAAGAAAAAAGGGGTGAACCGTAAGAAAAAAG  
AGGAAGAAGAGAAAAAAGACTCAGATCAAATGAATGATTCACCCGGACACTTGGCATTTGGCTCGGTACTCATCACACG  
ATGACATTCGGTGAACCTTCACAGTACCTGCA

BPB-7221

TGCAGCCGTAGCCGCCGTCTTGTCTGCCTTCATGAGCAATTTCTTATCACATTATTTGCACTTTTGCAAAAAGTTTCGGCG  
AGACCATCCTCGTCTGTAACATAATTCTTCATCGTAGTACCTCCAAATGGTAGAGCATCTCCAACGAGTGTTTTGATTTGG  
ATTAGACATGTGTGTGGAAAAATGCGATGGAGTTTGAGTGTGAGAAATGAGAAAGTGAGCATCCTTTTTTTATAGCAAAAAA  
TGGCACGTTAGGCACATTAGACAACAATAATGCATAAAATAAAAAATGAGGTAATGTATCATCTGGGATTAATCTTGAGC  
TTTTATTCTGTCTACCTCATTAATCCTCCCATTCTTGGGAAGTAAAAGAATACAAAGCCACGCTCTAGAATTACAAAAG  
GGAAATAAAATTACAAAAAGATAAGAAATTTACAAAAGAAAAAGAAAAGGACAACACTACTATTCTTCCCGTTCTTCTTC  
TTCAAGGTTTCAATTTCTTCAAACATGGGATCTTCTGCA

BPB-45000

BPB-26569

BPB-6873

TGCAGAAAGTTAATATCACGTATTCTGTTAAAACTAAATCATTTCTGCAATTCTATAGAGCCACAAAAGAGCACATGC  
TCCAACACGAATATGTTTGGCCAAATAAACATCCACTCCCCTGTAAAAGGCAAATGATTATTATGATTGTTCCCTTATTTAT  
CTTTCCGGCATCAGCTAGTATGTAAATTGAACATCATTTCTTTTGGCAACAGACGCTAGTGAGGAAAATACTCTAAACTGG  
GAGCAACGGTACAACATCATTTCTTGAATTTGCCAAGGGAATACTGTATCTTCACGAGGACTCAATCCCAAGGATAATCCA  
CAGGGACCTTAAAGCTAATAATATTCTTCTAGACGAGGAGATGGATCCTAAAATCGCAGACTTTGGATTGGCAAGGCTGC  
TACAAGAAGGTCACACCCATACTCAAACCACTAGAGCTGCTGGAACACTGTAAGTCAAATGCCTATAAATTAGGTTTGCAA  
AAACGAAAAAGTTACTTGTAAATTATGATCTATATCACTTAGTGAAGGCCCGTTTCCAAGCCTAATTTCCCATCCTCTGCA

BPB-9410

TGCAGATGTACAAAATGCCGTCATCAACCATATGTGTGGGCAGCACGGTCACATCATAGTGGCAAGGCAAGAGTAGCAGG  
CCAGCACCCAGAAAACACAGTAGTTCCACCTTCCCTGTCTAATCGCGGCAAACACGGTCACAGTCGTAGAAGTGATGGAT  
AATTTGATCCTTTTAAAGAATGTATTTTGTCTGATCCCTCCCTCGACATTACCAACCGGCAAGGCAGCTTGTTTTTATCCG  
AGAGATTATTAGTCTTTGACGCAAGTTGGTGATTATTTGAAGAGATGAACACAGCTAGCTGCCGTCGATGATCCATAGCT  
GCGGTAGATTATTTTTAAAACTCAATCTAAAACCTAATCCCAGTCGGCACTGCTACTGTGCTTGTTTATAGTTTTTCAA  
GCGAGGCCGGATCTTGGACATTGATTTTCTTGCATCACCCTTACCAGTATATTACTTGTATGGCATTAGTCATTAGAA  
ACCGTAACTATACATGCATACGTACCGGTGCAGTTGTGAGCTTGACGGGCAACCGCTCCAAATGATGATTAGAGGGAGAG  
GACGATGCTGCACTGCTGCTTCCGCCTCTGTTTGTGCGGTACTTAGCGTATGTACGTACGTTCTTCTTCAAGTTAAAAAC  
ACAATCTCACAGATTTCGGGTCTTGGTCTCTTGAATAAGCATATTTCTAGGAACACATACCACGACACGACAGATAGCAGT  
TCCAAAAAATATATTAAAACTATTATTCTGACTTCGTACTTAACTTGCTAACGAACCTAAACTGATTTCGTCTCTTTTCTA  
TATTTACCTGATTTTCGGACGCCCCGGCTACACCCGCTCGGTGGTGGCAGCCTGCACGTGNTCCATCAAGGGCNAATTTCTGC  
NNANATCATCNCNNTGNCNGNNNTCGAGCATGCATCTAGAGGGNCCAAT

BPB-9762

NACGGCCGCCAGTGTGCTGGAATTGCCCCCTTGATGGATCCANTGCAGGAGAAGCAAGAAGAAGCCCAACACGACTTCCGG  
TACAAGCGACGGTGAAAAAAGGCCACGCCCCGACCCACGCCCACAAAAAAACATGCGTCGCTCGACCTGAGGCCACCT  
CATTCCTCCATGACAATGGTGACCCACACTGGCACCACACGCTGACCAAGGGCTTCACTTGGTGAATGACCCAGACAAAAT  
TTAGAGACACAATCCAAAATCAACAACCATAAATTGGCTGTGAAGCCTTAAAAATTTAGGGAGCTTAGTGTTATAGAAGATG  
TAGCACCTCCGATCAATATAAAACAAAGGTTTATTCTCAACTAGGTAAACAAAGTGTTTCATCCTACCTCGTCATCAGTACG  
TAAACCGGAAATTTTCACTCCCAGACTCAAAAACCATTTCTTGCTGATCCAGTTGCATTACATGCGGCAAGTTAGCATATA  
TCCGGATCAAGATTACCAGCTACTTTTGCTTGGGGTGCTGCA

BPB-8308

BPB-9280

BPB-9108

TGCAGGTTTAACTCAAGAAGACACCAATGCCAAAGTATCTATGTCAACCAAGACTAATTCTACAGAACTATTAGCAATCT  
CCAGACCTTTAGGCAGCTCACATTATTACGCGTGCATCAACAAGTTCAGTTCTACTCCCAATCCTGCTACAAGCCGGGTA  
GTAAACGGGCGTTTTANCTTTTTTTTCATTTTGCAACGAGTGCCTTTTACGCTCTGTCCCGTGCTTGCAGTACATAAATGA  
GATTTCCCTCAATTATCTGCCTTATTTTTACTTTGTAAAGGCCCTTTATCTACTTTAAACCCTTTAGCTTAGGACCAGATTA  
ATTAGGATATAGTGAACAATGTTATGCACGCCATTTTAGGTTTTGCTGCCCGGTAGGAGACTAGCTAAAGCTCTAGTAAA  
ATCAGTAGTGCTTGATGAAGATTCAAGAACACCAGAATCATCTTTAAGCATAGTAACTGCA

BPB-8935

BPB-0617

TGCAGTAATTCCGAAGATTTGTTATTTACGAAGTAAAATGAACAAGCCTTCTCATATTGGGGGATTCCCTTCCATTTTGGG  
GAGTAAGTTTTTCCCATATTCCAATTTTTTAGTTTTTTTTTATCTCAATTTTCATTTTTTCTATATATTTTTTGACTGATTG  
AGTTTTTATTTTGGAAATGCCAGATCATTTATCTGTATTTTGTGATTGTTGATGTTATTGAGAATCATCAATCAACTGTGG  
ATTATTTCTCTTCCTCGGATAACTCATATTAAGAATGATGATTTCCAGTATCTTGCATTGGTCGATATGAATTATGAGTCT  
AAGAAAGCTTTTGCAGTTCTATCAGTAAGCATCGTATAATATATTTTCATGTGTTTACTTATACTTTTTCAGCTCCGGTATTT  
TTTTCATTTGTTTCATTTCTTTTCATTTGTAGCTTCGAGACATATCTCAAACACCCCTATGCTAATGTTGGGCTTGTGAACAA  
TGCTCCTGTTAATCCTTCCGAGTTTCTTTTCAGTTCCCTCATGTGGAGGTATGTCTTTTCCCTTCATTCAGATTTTCATTGAAT  
ACATGATTTTCAACTAGTCTCTTGTTTTTTTTGCACATAGTTTAATATTTATAGATAATGTCACTTTTAGGTCATTAATG  
CCATGAATGTTGACTTAGATGGCAATGTGAAGCCAGATCCTCATTTCCAAGAAACAAGTAAATTTGAATATTTTCCCCCTC  
GTACAATATTGTTTCATCATTTTAAAGCAAATTTGTTCTGCA

BPB-8112

TGCAGATGTACAAAATGCCGTCATCAACCATATGTGTGGGCAGCACGGTCACATCATAGTGGCAAGGCAAGAGCAGCAGG  
CCAGCACCCAGAAAACACAGTAGTTCCACCTTCCCTGTCTAATCGCGGCAAACACGGTCACAGTCGTAGAAGTGATGGAT  
AATTTGATCCTTTTAAAGAATGTATTTTGTCTGATCCCTCCCTCGACATTACCAACCGGCAAGGCAGCTTGTTTTTATCCG  
AGAGATTATTAGTCTTTGACGCAAGTTGGTGATTATTTGAAGAGATGAACACAGCTAGCTGCCGTCGATGATCCATAGCT  
GCGGTAGATTATTTTTAAAACTCAATCTAAAACCTAATCCAGTCGGCACTGCTACTGTGCTTGTTTATAGTTTTTCAA  
GCGAGGCCGGATCTTGGACATTGATTTTCTTGCATCACCCTTACCAGTATATTACTTGTATGGCATTAGTCATTAGAA  
ACCGTAACATACATGCATACGTACCGGTGCAGTTGTGAGCTTGACGGGCAACCGCTCCAAATGATGATTAGAGGGAGAG  
GACGATGCTGCACTGCTGCTTCCGCCCTCTGTTTGTGCGGTACTTAGCGTATGTACGTACGTTCTTCTTCAAGTTAAAAAC  
ACAATCTCACAGATTCGGGTCTTGGTCTCTTGTAAATAAGCATATTCTAGGAACACATACCACGACACGACAGATAGCAGT  
TCCAAAAAATATATTAAAACTATTATTCTGACTTCGTACTTAACTTGCTAACGAACTCAAACCTGATTCGTCTCTTTTCTA  
TATTTACCTGATTTTCGGACGCCCCGGCTACAACCCGCTCGGTGGTGGCAGCCTGCA

BPB-0589

TGCAGGCTGGGCCCAGCCGCCACCGAGCGGGTTGTAGCCGGGCGTCCCAAATCAGGTGAAATATAGAAAAGAGACGAATA  
CTGATTGGTACTTCAGTTTGAGTTGCTTAGCAAGTTATAAGTATGAAGTCAGAAAAAAATTTATTTCTTTTTTGCAACTG  
CTATCTGTGGTGCTGTTGATATGCTTATTGCAAGAGACCAAGACCCGCGCGAACCAGTGAGATTGTGTTTTTAACTTGA  
AGAAGAACGTACATACGCTAAGTGCGCGACAAACAGAGGCGGAAGCAGCAGTGACGATCGTCCCTCTCCCTGTAATCATC  
GTTTAGAGTGGTTGCCGCTCAAGCTCACAACCTGCACCGGTACGTATGCATGTATAGTTACGGTTTCTAATGACTAATGCC  
ATACAAGTAATATACTGGTGAAATGGTGATGCAAGAAAATCAATGTCCAAGATCCGGCCTCGCTTGAAAAAATATAAACA  
AGCACAGTAGCAGTGCCGACTGGGATCAGGTTTCAGATTGAGTTTTTAAACATAATGTATGGGTGCACTGAGATATTTCG  
AAGGCCACAAAGCTAGCTACTGTGCTCGGCCGCTCGGATGCTCATGCATGACCGCCGTGATGGTGACGGTGCAGCTATGG  
ATCATCGACGGCAGCTAGCTGTGTTTATCTCTTCAAATAATCACCACCTTGCGTCAAAGACTATTTTCAAATAATCTCTC  
GGATAAAAAACAAGCTGCCTTGGCCGTTGGTAATGTGGAGGGAGGGATCAGACAAAAATACATTCTTAAAGGATCAAATTT

ATCCATGACTTCTACGACTGTGACCGCGCTTGCCGATTAGACAGGGAAGGGGGAACACTACTGTGTTTTCTGCTGGCCTGCT  
GCTCTTGCCCTTGCCACTATGATGTGACCGTGCTGCCAACACATATGGTTGATGACGGCATTGTTGTACATCTGCA

BPB-1487

BPB-2260

TGCAGATATCTGAAC TTGAAAAAGTGAAGTCCCCAAGAGAGGCACATCGTATAAAATTAGTGGA AAAACATAGGCTCAAG  
GACTTGAAATTGGAGTGGACCAGAGGTGTTGAGAGATTTGTCTATGACAAAATGTTGTTGAAAAATCTAGTGCCGCCAAG  
CACATTGAAGAATTTGGAGATATGTGGTTACAATGGTGTGAGCTTTCCCTGCGTGGCTAGTGGGACAAC TACCAAACCTAG  
TCTCATTTGGTTCTCAGAGATATGGAAAATGTGGAAGAGTGGAAACATGTCATACTCCATTGATGAGGACCATGTGATTCAA  
ACATTTGGAATAACATGGTTGTTCCATGTTAAGGATGAAACGACCTCTTCCTAAAGCTAAATCATGGGTGATAGCACACAG  
TGATAATGTATTATCATCATTTGGATGAGTGCAC TGTGTACACACCAGTGCTTTCCCTGCACTTCTCCGATAACTACCG  
TGTTGTTGTCTGGTTAAATACTGCAAGGGGCCCTTATCGGTGGAGGTTACTTCAACACTTCACTGGACTCTCTTCTTTGTCA  
ATTCAAACTGCGGTGATCTAACTGGATCACCAGCGATCACCATCATCTATCGTCTCTCGAGGCAC TATGCCTAGAAGA  
CGAACATATGGAAGAACTGCCAAAATGGATGGGTGAGCTCAGATCACTACACAGTCTGGAAATAAGGTGGAGCAATGTTG  
TAACAGAGTTAAATGAGACAATGAGGAAACTCACAATGCTGCA

## CHR. 2H

BPB-8511

TGCAGCGAAGAAGATGTAGCATAGAGTCATGCAGTTCGCTGGAAGTGTGTTGAAGCCATCCACACCCAATATCGCCATGT  
TTCGGCACACAATGGCATATGGTGCTGGGTATTCGGTGCCGCTTGTACCGATGTTATGTATATCGAATCTGATTAGTTAT  
TATGGACGAACAATGCATATTAGAGCCAATGTAAATTCAGTGAAAGCAAGTAGATTATAAGTACAATGAAATTTGT CACA  
TGCTCATGCAATCAAATGGTAGAGCAACAAC TAGTCCACTAATCACAAGTAATAGACATAACTTATTTAAAAAGGTCAGT  
TCTTCCTTCCTAACACCAAAACCCCTTTGACCGAGCATATGCATTATAGTAAATGTAACCTTCTTCCTCGCTGCCAAAAAT  
TTGACTGATCACCATGTCATATTCGCAATGTTCTCGAGGGTGGCACTCCCATATTCATGTCAAACCC TGCAATTA AAA  
AGAATCTAATCTAAGTTATTTGAATTCACCCATGAAACTAAAACACGTATCAGTAACAATGCTTGTGTACATAATCAA  
CAGAAACATTAGATATACTGCA

BPB-7930

TGCAGCATGTTGGCATGGGCCGGCATACTAGCGTGCTGCCCACTTTTATTCAATTTGTTATTTTCTTGTGTT CATCCAGT  
AGAAAAAATCGCAGATTTTTTATTTGTTACGAAAATAAAAAATATGAAATAAAAAAAGGTTTACGAATTTAAATAAAAAG  
GTTTCATCCATTTGAAAAAATACTTAAAAGGTT CATCAATTTTAAAAAAGTTTCATCAATTTAAAAGAAAAAATCAT TG  
AAACTGGAAAAAAGTCAACTGACGCTTAGATGGGCCAGCTCATTTACGAACACCACACGAGTTAACAAAAATGCACGATA  
ACTGAATAGGAAATGCCACAGGACGGCCTGCA

BPB-6894

TGCAGTCCATGGGCGATAACCCCTCCACCGGCAGGTGCTCGCCCCGGTTCGATCATCCTCCAAACCTCGTT CATCGCCACC  
GTGGTCTGCGTCGTCTGGGTACGTAGTTTGCATTAATTGTTTCAGCCAGTACATATATAGAACATTCGGTTTAAAGTGAT  
ATATATCAATCGAATTACACAGATAGAATATATAACATTCAGTTCAAGTGAATTATAATCACATGCATATACCGTGC GTA  
CCGGATTGTTGGCGAACATGCCGGCGTCAATTAGGTTAAACTCCTCCAATTCGAAATTTAGTGGACACAAGTTTATAATG  
TAGAACTTGTGGGCGAGGAAGAATGTTGGCGCGGCAGTTGCGGCGATGCAAATGTCCGAGAGGTTGGGGTT CATCACCCG  
ATCCTGTTGCGCCTGTCAATGGTTTCAGCAGCTCGATCAGTACATCCGATGACGATCAGTTGGTT CAGAAGCAGCGCAGTA  
ATTAAATAAGTAGCTAGCTTAGCTAGGGTACCTTAGAGGTGGAGAAGACCACAAGCTGATTGCGCTTGATGTCGAACGTGG  
GCACGATGACGTTGGTGACGGTTTCCTTAAGCTTGCGGTGCGCGAGTTTCCCTCTGACCACCTTGCGGAGCCCC TCGCCG  
TCGTACTTGGGGCGGAGCAGCGGTACCTGACGAAATCCGGGTTTCAGCAGCGTCATGCGCAGGCCCTCCACGAAC TCTT  
GATGCACTCATCGAAAGGCGTCGAGTCCAGCGCCAGACCCTGCGCACGGCACATCGCCTGCA

BPB-7793

TGCAGTAAGAAAAGTTGCATCTTTCAGGCAACACAAACACACTGTCCACTTCTCTGT CAGTTTATTGCAATTTGCGTTCTT  
CAATCTTCAGTGATAACATCCCTCTGAACAGAGATCATCATAATCTGCGTGTTACTCCCTACGGGTTTTGGTTAAATC  
ACTCTTCTAGTTTGACCTTTGGATAAAATCTGCATATTCCTACTAGTTTGGCCTTTGGACAAGTCTGCATATTCCTATTAG  
TCTGCGGGTAGTACTAAATTTGTTTCTGCTTAAATCACTCTTCTATGGTGTGGTTCTGTTGGTGCAAATCAGGAAGTGCT  
TACTGGAGTATATCTAATGTTTCTCTTTGATTATGTATACAAGCATGTTTACTGATACGTGTTT TAGTTTCATGCGTGGA  
ATTCAAATAACTTAGATTTGATTCTTTATAATTCAGGGTTTGACATGGAATATGGGAGTGCCACCCCTCGAGAACATTGT  
AGAATATGACATGGTGATCAGTCAAATTTTTGGCAGCGAGGAAGAAGGTTACAATTACTATAATGCATATGCTCGGTCAA

AGGGTTTTGGTGTTAGGAAGGAAGAACCGACCAGGAAGTCGGGCACGAACATATCTTTTCGTCGCCTTTATGTCTATTGT  
AAAGAAGGATATCGGGCGAGGAAGCACTTCAAAAAAAGTGAACGAGTGTGAACCTCCTAGGCCGCTGTCACGTTGTGNATG  
TGGCGCCCGGATGGAGATCGAGCTTCGTATGGATAATGGTGAATGGTTTGTAAANATTTTGTGGACNAACATAACCATC  
CACTCGCTAAGCCTGACCAGACAGCTTTCATAANATCACATCGCGGACTGAGTGATGTGCAAAAGNNNNNNNNNNNNNN  
NNNNNNNNNNNNNNNNNNNNNNNNNNNNNNNNNNNNNNNNNNNNCAAGTACAAGAAGAAAAAATGTTTAGCACAAGTGATGCATCTC  
CTGGAAGTTTTTTTTTGGTTGCATTGTGTGACAGAACATTTAGTATGCTTAACAAGATGACTTTTCAGAAAAATATATATGC  
AGTACANNATGAAACACAAGGAGTACTAGTTAATAAAATNGCAACCTTTTTAAATAAGTTATGTNTATTACTTGTGATTAC  
TGGACTAGTTGTTGCTCTACCATTGATTGCATGAGCATGTGACAAATTTTCATTGTACTTATAATCTACTTGGCTTTTACT  
GAATTTACATTGGCTCTAATATGCATTGTTTCGTCCATAATGACTAATCAGATTCGATATATATAACATCGGTACAAGCGG  
CACCGAATACCCAGCACCCTATGCCATTGTGTACCAAAACATGGCGATATTGGGTGTGGATGGCTTCAACACGCTTCCAG  
CGAACTGCATGACTCTGTGCTACATCTTCTTCGCTGCA

BPB-3119

BPB-6199

TGCAGCGGTTTACGAGCGCAAACCTCTCGTTGTTCCCTCTCGGTCTCTCCTGATCCACCCATCACAACAGCAACAGTATATG  
CTTATATATATATGGGATGTGTGCTGGTGTGTGCATGAGCAACTGAAATTTTCTAATAAGTTACATGGATAAGTTGAGTATG  
TTGTAAATGCATTAACCACTGAAAGATTGGATAAACATGTGCACCACATAAACNAGCATGCTATAAATTTCCCATCCNAT  
TACCTTTGAATGCTGAAGGAAGGAAAGCTTCAAAAGCTGAGTAATGTACATCTCGCCGAGCTCCCAAGCGGTGCATGTTG  
GTGTTGCCCAATAAAAGAAAGAGAAATCCACTGGTGAATTAGATCACTTTGTAGATATCCTGTATCCTTTTGGAAAGATT  
GCCCCAATAGGCAAAGCAGAGCTTCAAATACCGAGGCATAANAGTATAGCTTAACTTCNAGGATGCAAGCACCCTGTGTGC  
AGCTTTATCTTTGGGATCTGATGAAGAAGAAGATTCTTTCCNGATATCACTGTCTCTCANTTTCTTCCACTGATTATAGG  
TCATAGTTTCCAAAATGGGTCCNNTTGATTGAGCAGCTAANCCACACCTCCNCACTTCGCTGCNNNNNNNNNNNNNNNN  
NNNNNNNNNNNNNNNNNNNNNNNNNNNNNNNNNNNNNNNNNNNNCATTCGCTGTGGTTGCTATAACANCCACCTTGCCACCCCTTCCANCC  
TTAAGCATGNCAGTCAGACTACGCAGTTGGGAATCATCCTCTGCCACAAATCATCTAGAATAATAAGANCCCTTCTTATT  
GGCGAGTAGCTGTGCAAGTGATCTGTGTATCATCTGCGTTTTAGTGAGTACTCTCATTCTGTGACAGTTGACTTTATTA  
AAGAATTGCCAATTTTGTTCAAATCAAATGTCTCGGACACATAAAATCCACACACGGACGTATTCTTCAAATTTTGTATTA  
TTATTGTAAATCATCTCGCCAAGGTGCTTGGCCAAGGCCCTCCAATGCCGTGCATAGCAAGGACAACGAGGTCTTGGAC  
TGTGTTCTCAGATAAAGAAACCCATATTTTATTTTCCCTCTTCGGTCTTCCCAATGATTGAATCCTCAATGGTTGAATATG  
TTTCTCGCATTTGTATGAATTTTCTGCTCATCAGCATTAGTGCCCGGCACTAACATGAATTTCCCGATACTGATGTGTGATC  
CCCTGCA

BPB-5173

TGCAGTGGTTGGTTTGGAGCAAGCACTTTGAGTGGCGCATATGGGCTTCGCTGGTCCCGATAGTCGGGGGGATCCTCCTG  
ACCTCAATGACAGAGCTTAGTTTTCAACATTTTGGTTTTCTGTGCTGCCATGATAGGCTGCCTGGCCACGTCTACCAAGAC  
CATCTTGGCAGAGTCCCTGCTCCACGGATACAAATTTGACAGGTACATGCTTATCTCGTTGTGTAATATCTGATGCTTTA  
GCGACTGGTGTTGTATCGCATTTCTCAATTTTAAAGCATTTTATCTTCTTTCTTACTAAAATGATACTAGATCAAAAGATT  
TAGTTCTTACTGTAGTGCTACCGTCAGGTTTCTGAGTCCGTGAAGTTCTTGCCCTCGGTGAGTATTTATTAAGTATTTCTG  
TTTCTGCACTGGATCCATTCAGGGGCAATTTCTGCAGATATCCATCACACTGGCGGCAGCTCGAGCATGCATCTAGAGGG  
CCCAATTCGCCCCTATAGTGAGTCGTATTACAATTTCACTGGCCGTGCTTTTACAACGTCGTGA

BPB-9683

BPB-9320

BPB-5363

BPB-2300

BPB-7445

TGCAGGTAGCACCATGTCTCTGCATCAATCCATTTTCGATCTGACTGTAATTTCTGTTCCATTCCCTTGCTTTGCATGTGTG  
TGTGTGCGTGCGTGATCCTGCTGCATCTGTTTGCAGGTGGCCGTCAAGTGCAGGCCGCTGACCGACAACGAGAGCTGGCG  
CTCGCGGCACATCATACAAGTCATTGACGATAAGGTAAACATTCAGAGCCTTGGCTTGATCCTGCTTGATTTGGCTGGTG  
GTTTGTGTATGGGTGGTTACAATTTTGCCATGGATGATAATGGACTAATGGTATGGTAGCAAGGTAGTAATAATGTTGT  
GCTTGTATGTTTCTCCAGAATGTGGCCGTGTTGGACCTGATGTCTCCAAGGACCGCCTTTTGTAAATGATAACAGCTGTA  
ATCAGCAATTGATTGAGCATCAGTTGGAAAAATAAGCAGGGATATGTTCATTAATAAGATTACAGTTTGTGAAGCTTAGG  
CGCTTTGCAACATCAGATTCGAGTTGATGTAGATATGCCATGCTTACTATTTGACATGAATACTTTGTGTTGTGCTTCTT  
AGCTCTAATAGTACTTTGTGTTTACTTATGTAAATTAAGGCCAACCTTGTAATTGGAAGGCTAGCTTGGATGGTGCTGA

TGAGTTCCTTGGATCATGATCGATGGCCAACTCCACCAGCCTCTGCA

BPB-7418

TGCAGAGCAGAGCGGGCAGTAGGGGTAGTAGCGATAGGACTTCCTCTGTGCGCATCAGTAGAGTAGAGGCCTTGCTCTGGG  
GAGCATCGCAGCGTCGTCTCTGTTGTAGGAGGAGAGAGGGGTACCCAAAAGGGAAACCCCTCCTCTTTGTCAAGTCTCG  
TAGAGTAGCGCAGTGGTTTGCATGTGATGTGCTAATCAGGCGGTCTGTGGGTTCGAGACCCACGGCGCCAACCCCTTT  
TTCGTGTTTTGTTTCGCAGAGTAGCATAAGCAACAACAGAGACAATTTATCCTGTTAGCCATCCATGTTCTGTGCGAGCAT  
ATGGACAGTAGCAGAGTGGTGGCTTGTTTCGTTGGTGAAACACGGGGTCTTGGGTTCGAATCCCTTCCCCATCCTTTTATT  
TCTTTTGCCTTTTCTTTTACTGTTTTGAATATGTTTGCCTGTATAGTTACTGCA

BPB-9870

TGCAGTGACTAGTGCGGATCACTCGCTGCTGCTGCCTGCTATGGGAGGTGCTTCTTAATTTTTATATAGCGGTGCCATTG  
CGCGCGGCGTGTGGTGTGGCGAGCACCTCGTTGTGGGCGGACCCTGACAAGGTACAACGCGTAGGCGTAGCATTATA  
TTTGTATGCTGTATATAATAACCTTTATATGCACAAGCAATGCATGCTCCGCGTGTGAAATCTGAGACCCTTTTTCA  
ACAACCAACCATGGATCGCTAGCTTATTCCAAAGTTCAGCTCAAAGGTCTTGATCGATGGCCATTTTTTAATCCTCCG  
TTCATACAGGCTTCTTTAATCACCCTAGTTCAACCGACAGGCTCCTCAATTTGTGCCATTTGCTTTTCTCTTTGCACA  
ACAATAGTAACGCTTTTTACTTGATTCTTTGCAGGTCTTTTTGTTGGGGGGGGGGGNCNNNNNNNNNNNNNNNNNN  
NNNNNNNNNNNNNNNNNNNNNNNNNNNNNNNNNNNNNNNNNNNNNNNNNNNNNNNNNNNNNNNNNNNNNNNNNN  
ATTAATTTTACCCGTCAAAAATTGCCAGAGTCAATTACACCCGACAGGTCTGTGAACTTTACAAGAAAAATCAGTTTGA  
TGCTAGAACTTACGGCATAACATGAACCGTAATAAACTTGACTCGGGCATGCATCTATGATTCTAATCATGTTTTGTA  
TACATGTAACATAACGAAAAGGCACACCAACACGGCGTGGGACCCAATGTAAGTGACGGATGGCGGTGTCGTGCGTGTGG  
CATGATTTTTTGCAAAAAGAACCTGATATTTACCTGTTTACACAAAAAAGCATATCAATTGTTTTTCTTAAGTAAC  
CTTGAAACATAACTTTGACAATTGGGCCCCACCCACCAGAACACAATAACAAGGAAAACGAGGACGCAAAATTAATC  
ACTGCCAAGTTCAAACACACGACCTTAAACGTGAGTGGGAAAGGCTAGCCACCAGCCGACCCACCATATATCACTTTG  
TATAAATGGGAGCTCTATCCGTAATGACCTACAGACAAGAAGGCACATAGGCCTTAAATGGCCTGCA

BPB-0205

TGCAGAGGAGAAGCTTGCAAGGATGCTGGCAAAGAACAAGAAGGGAGACGACGAGTGGGGTTTAGGTAAAAGTAGAACTC  
GTCTGGTCTCAGACGGTGCTAATATGCTCTGGAGCTGCTCAAGGCTGATGGTTTGAAGATGCCGAACTTTTGGAGCTC  
GTCTTCAAGATTTGGGTGGATAAGCTGTTGTATGCAGCCACCCGATGCAACAGAGAATCCCATGCGAGGCAACTCGGCCG  
TGGCGGTGACCTAATTACCATCGTATGGATTATGGTAGAGCATGTTGGCCCGTTTGAGATTGGCAAAGAAGGTCCAGATG  
AAAAAGAGGAATCCAGTGATACAGAAGATCCGGGCGATGGAACCTGGTGATTGGATCAATGACAATGAACACCCCTCATCA  
GCGGAAGACTTAGAATCACAAGGGGGGGCTGGGGGTGGGGGTGGCCACATCCACCATCATGGTTGCTACCGCCGGCAAT  
GCCCCAACCTATGCAACCACAATGGTGCCCTCCCCAGCCGATGCATCCGCCATGTGATGGTGGACATATGTTCCCGTGGC  
CGTGGCTTCAAGCGCCATGGGATCATCCGACGACATACTTGCCAACACTCGGAGACGGCGGACATATTATGCCATCGCGA  
CCAGTTGCGGGGGCTCCACCCCTTCCCCCTCCCGGTGCCCCCTCGTCTCTGCA

BPB-6897

TGCAGGTTACAAAGTCTTGGAGGTGGTGGCTCGGAGGAGGTGTACGACAAGATCATATTTGGTGTCTCATGCACCTGATG  
TTCTGAGAATACTAGGGGATGAAGCAACACACGAGGAGTTGAGAATCTGGGTGCTTTCCAATATGTCCATAGGTATGAA  
ATTTGTGTCTGCTATAAAATTTAATTTACTCAATTGATAAGTGGCGTACGTGTGGCACCAACACTTTAGTCCCTCAAGAC  
AATGTTTTAAATAGCGGGCTATGACAAACTAGCGGCAGGCCTTAAATCAGCTGTAGCAGGCTATAACGACATATTTGCA  
TACGATACCATTTGACGGCACCCGTGTTGAAATGGTTATAGCGGGGCTTCAGCCGGTTATTTAAACCTACGGAAGGTGCC  
ATAGCACCCGGGTCTCCCGACACCCGTTTATCTGGTGCCTCAGTTTTTTTTGAAGATTCGAGCTGAGGACTAGACAACAG  
CAGGTCATTTGCGTCTGCATGTTAATTAATAAGTTATTTTACATAGCAGAACATGGTCCGTGCTAGGCTGCACGAGACAG  
AGTAGGTGTGACAGCACCGTGCTGCA

BPB-0715

TGCTCGAGCGGCCGCCAGTGTGATGGATATCTGCAGAATTCGCCCTTGATGGAGCCAGTGCAGGTTACAAAGTCTTGGAG  
GTCGGTGGCTCGGAGGAGGTGTACGACAAGATCATATTTGGTGTCTCATGCACCTGATGTTCTGAGAATACTAGGGGATGA  
AGCAACACACGAGGAGTTGAGAATTTGGGTGCTTTCCAATATGTCCATAGGTATGAAATTTGTGTCTGCTATAAAATTT  
AATTTACTCAATTGATAAGTGCCGTACGTGTGGCACCAACACTTTAATCCTCAAGACAATGTTTTAAATAGCGGGCTAT  
GGCAAACCTAGCGGCAGGCCTTAAATCAGCTATAGCAGGCTATAACGGCATATTTGCATACGATATCATTTGACGACACC  
CTGTTGAAATGGCTATAACGGGGCTTCAGCCGGTTATTTAAACCTACGGAAGATGCCATAGCACCCGGGTCTCCCGACA  
CCCGTTTATCTGGTGCCTCAGTTTTTTTTGAAGATTCGAGCTGAGGACTAGACAACAACAGGTCATTTGCGTCTGCATGT  
TAATTAATAAGTTATTTTACATAGCAGAACATGGTCCGTGCTAGGCTGCACGAGACAGAGTAGGTGTGACAGCACCGTGC  
TGCA



BPB-2243

TGCAGGAGATCGAATAAAAAATAAGAAAAAATGGCAACGAAGCGGCAGCCACCAATTGCGCACACGCGCACAAAGAGAGCA  
AACAGGAGAGAGAACGTTGGATGGACGGTACCTCTCACACTTATACCACCCCTCTACAGTTGGAAATGCAGACTATGGACT  
AAGAATAGAACAAAAGTGAATCAAAAAATATTAGCTTAATCTCGATGAATATAGATCTTGATGCCTTTTGAAGGCCAACT  
ACTAAGGTAGTAGTGACACCATGGTTCCTATGGCTTTTTCAAAAGGAACGCAACACTATAATAGCGAAAACCTGATGTA  
TATAAGCTACAGAAAACAATATAGATAGAAGAACCAAGCATGTCCCTTTTCATGAGAATACAGTAGGGTGGCTGTTTCTGCA  
CATGAAAAATAAAATCCACCAAAAAGGGAGAAAAGAGTAAAACCATAGCTGGTAACTTTGGACACACATCANATATAGTA  
CTGGTATAATTTAAAGCATAGTAAAGCTTGATAAATTTAAAAATAGAACTTTGCAAACAACATGTAGATTGAAGTATCATT  
TAAATGAGTGAACATATTCATAGATACGTACTTTGTAGGTACAAATATCTTTCTCGAAAATACATTCCATCAAAG

BPB-9131

TGCAGTCCCTGAAGGTAGAGGATACACGATCTTTACTATATTTTTATGGGTGTCTACATTGTTGTACACACTTTGATGGAA  
TGTATTTTCGAGAAAGATATTTGTACCTACAAAGTACGTATCTATGAATAGTTCACCTCATTTTAAATGATACCTCAATCT  
ACATGTTGTTTGCAGGTTCTATTTTAAATTTATCAAGCTTTACTATGCTTTAAATTATACCAGTACTATATTTGATGTG  
TGTCCAAGTTACCAGCTATGGTTTTACTCTTCTTTCTCCTTTTTTGGTGGATTTTATTTTCATGTGCAGAAACAGCCACC  
CTACTGTATTCTCATGAAAGGGACATGCTTGGTTCTTCTATCTATATTGTTTCTGTAGCTTATATACATCAGGTTTTTCGC  
TATTATAGTGTTGCGTTCCTTTTTGAAAAAGCCATGGGAACCATGGTGTGCACACTACTACCTTAGTAGTTGGCCTTCAAAAG  
GCATCAAGATCTATATTCATCGAGATTAAAGCTAATATTTTTTGATTCACTTTTGTTCTATTCTTAGTCCATAGACTGCAT  
TTCCAACGTGTAGAGGGTGGTATAAGTGTGAGAGGTACCGTCCATCCAACGTTCTCTCTCCTGTTTGCTCTCTTTGTGCGC  
GTGTGCGCAATTGGTGGCTGCCGCTTCGTTGCCATTTTTTCTTATTTTTATTCGATCTCCTGCA

BPB-7011

TGCAGAAAAATAAATAAATAAACAGCAATGGATGACAGTATGCTTAGGCGTGAACACCATGATCTGTGTGGCACCTAGCT  
TCCTCACCTTCCCTAGCAAATTTTCTGATCAATTGGCACGCGATGGACGAACCCCGGGTGTGTCCAACAAGGACTTGAA  
CGTCGCGTTTCAGCGCCGAACGTGTGCGTCCGACAGGCTAGCGCCTTTGACGAAGTATCTTGTTCCCTGCATCACACTGGTTC  
TGTTTTCTAGCATACATCTCTATCATAGAAACCATTGTTGAACTCTTCATGGTCACTCCACCATTATTCATCTCTTTTCACT  
ATCTTATCCGCATCGGTGATCATCCCACTTTTGCAGCAAACCTCCATTACAGTCATGCAGAGGGCCTCATCAACCTGGAT  
ATCTTCTTTTCTCATGTTTCAAGTGAACGCACCTTGCCCTTCTCTAGCTGGCCTAGCTTGAAATACAATCTCAGTAGGTCTAT  
TGCAGCAGAACACATCAGGGAGGCCATATTTGCACAGAGCTCTGAAGGCCTCTTCAGCTGCA

BPB-9832

BPB-1967

TGCAGATGCCGGAGGAATATAATCTTTTCAGGAAAAATCTCTGTCAAATTTACATTATTTCTGAGTGTACGATCGAACAC  
CATAACTCAACTAGGACCTGATGAGCAACTAACATCAGTAACAGCCTGTTCCCTATGTTGCAGAAAGGCGGATAATTCAAGA  
ACAAAGAAAGAAAAATAACACAATGCAGGAATCAGAAAGGCAGGTAACCTCTACATACAAGAAAGCAGATGGCACAACACATC  
TGATAGAGAAAAATGCATCTGACAAAGTTAGGAAAGTAGTTCTACAAGAGTAGCAGGAGGATTGAGAAAACCTCTCTATG  
CATTTATTAAGCTGGTAAGCAAATGGCTAATTTATGCAGAAAGAATATTTATTTACAGCTAGCGTAGCTGCTTTGAAAACCTCT  
AGGGTATGCAGATAGCATATTTAATGTTCGCAAGATCGGCACATGACTATTTCAAGAAACCTTTGGTAAATTTAGCAAGAAC  
ATTCACCTACTGTTGAAATCAGTGCCCGAAAGCATCAGAAGGGATAGGAGTAAAAGCAGACAACTGTTATGATAGAGAA  
TAAGAAGGGAATTGACCACACTTTTGATTGAGCCATAGGCAGAGAATATAAGTACAGGTTGGAGCCACTCCTAGCCTAGTG  
GAGATCATGGGTTGCCCACTACTCTCGGACGCGTGCANGGTTACAACTGCACTGGATCCNTCAAAGGGCGAAATTTCTGC  
AGNATNTCCATCACACTGGCGGCCGCTCGAGCATGC

BPB-8033

BPB-23426

TGCAGGAGCATAGAAATAATGGGATGGAATCTCGCACAGGACCAAAGGTTGTTGTTTTTATTTAGCTGAAGTATTTGTTT  
TTTCACAACTATTTTAAATGTGTATAGAATAATTTAGCTTGTCCTCTGTTTTGTCAGGAACCACCGGAGAATGCTGTTATA  
ACAACATGCTGCCATATTTTCTGCTATGAATGTGCACAAGAGAGCTTAAGTGAAGAGGAAGTCTGCCCTGTTTGCAAACA  
GAAATTATGTTCTGAATTGCTTTTTTTCACGCCAGTACTAAGGCTCTGTATCTCTGATGAGTTGGAGTCATATGCAACAG  
CAGCAGGAGATAGTTCTGCA

BPB-8050

TGCAGGAGCATAGAAATAATGGGATGGAATCTCGCACAGGACCAAAGGTTGTTGTTTTTATTTAGCTGAAGTATTTGTTT  
TTTCACAACTATTTTAAATGTGTATAGAATAATTTAGCTTGTCCTCTGTTTTGTCAGGAACCACCGGAGAATGCTGTTATA  
ACAACATGCTGCCATATTTTCTGCTATGAATGTGCACAAGAGAGCTTAAGTGAAGAGGAAGTCTGCCCTGTTTGCAAACA  
GAAATTATGTTCTGAATTGCTTTTTTTCACGCCAGTACTAAGGCTCTGTATCTCTGATGAGTTGGAGTCATATGCAACAG

CAGCAGGAGATAGTTCTGCA

BPB-8851

BPB-8721

CATGCGCTCCTTTGTTGCTCTTGTGCAATAAAACAAAATCAATCTACTACTGTATTACGAGTAACTTATTATACGGCGG  
CGCACAAAGTAACCATGCGGTACTCCTTGCCAAACATTTGAGCAGTAGAAGTACCTTCATCGATCCGGATACGCAGTCTAC  
GAAAGGGCGAATTCTGCAGATATCCATCANNNTGGCGGCCGCTCGAGCATGCATCTAGAGGGCCCAATTCGCCCTATAGTG  
AGTCGTATTACAATTCACTGGCCGTCGTTTTACAACGTCGTGATNGGAAAANNNGGCGAGTGAATTGTAATACGACTTA  
CTATAGGGCGAATTGGGCCCCNAGATGCATGCTCGAGCGGCCGCCAGTGTGATGGATATCTGCAGAATTGCCCTTTTCG  
TAGACTGCGTATCCGGATCGATGAAGGTACTTCTACTGCTCAAATGTTTGGCAAGGAGTACCGCATGGTTACTTGTGCGC  
CGCCGTATAATAAGTTACTCGTAATACAGTAGTAGATTGATTTTGTGTTTATTGCAACAAGAGCAACAAAGGAGCGCATG

BPB-7874

TGCAGGACCCTGCCATTGGCGTTCTGCTCTCCGGCATCCGCCATGGCTCTGAAATTCCTTTNCAAATCTCTGNCTTTTC  
TCTAAAGATTGTAGCCTATATGTGGGTNGGCAAGACTGAGATGATTGAGCGGATAACAATNNCACACAGGAAACAGNTAT  
NCNANNCAAGGCCAAGCTNNCNCNCGAGCTCGGATCCCTTAGTAACCTGCCGCCAGTGTGCTGGAATTGCCCTTGAGTAGT  
GCCAGAACGGTCCATGTAGTTTGTGGTGTAATTGCCCTAGTTGGTCACTAAATCTGCACTGGATCCGGATACGCAGTCTA  
CGAAGGGCGAATTCTGCAGATATCCATCACACTGGCGGCCGCTCGAGCATGCATCTAGAGGGCCCAATTCGCCCTATAGT  
GAGTCGTATTACAATTCACTGGCCGTCGTTTTACAACGTCGTGACTGGGAAAACAATCAT

BPB-46599

BPB-6881

BPB-3056

BPB-6438

BPB-7991

BPB-3563

TGCAGGCGCACCTTTAGGGGAACATTGTTCTGTGGAATGCAGGTGTACCTTCAAGTTGCCCTTATGCGCAATATGTGCGTCA  
ACCATGTTATATTATGTTCCCTTAGAGTTGGGTACGCGCTCATTTGTTTTAGGGCATAAATACGTATGTGTGACTACCC  
TAAACAGAACAAAAATGGAAAGGGGTCAAGGGACCTTTGCTTGGTTTGATTAAATTCACGTGTTAAGATTGAAGTGTGATC  
TTGCATTGATGTTCTACAAAGTGATTGCTAGGAAAGAGTGAATTACAGAAAGATACAAGTTTAATATATGATATATCGC  
TAAACTACAGATTGAAGAACAGATATTTACAACATATTGATTCAAGTGAACAACATGTAGTTTGTGGTGTAATTGCCCTAG  
TTGGTCACTAAATCTGCA

BPB-6194

TGCAGATTTAGTGACCAACTAGGCAATTACACCACAAAACCTACATGTTGTTCACTTGAATCAATAGTTGTAAATATCTGT  
TCTTCAATCTGTAGTTTAGCGATATATCATATATTAACTTGTATCTTTCTGTAATTCACCTCTTCCCTAGCAAATCACTT  
TGTAAGACATCAATGCAAGATCACACTTCAATCTTAACACGTGAATTAATCAAACCAAGCAAAGGTCCCTTGACCCCTTT  
CCATTTTTGTTCTGTTTAGGGTAGTCACACATACGTATTTATGCCCTAAAACAAATGAGCGCGTGACCCAACTCTAAGGG  
AACATAATATAACATGGTTGACACACATATTGCGCATAAGGCAACTTGAAGGTACACCTGCATTCCACAGAACAATGTTT  
CCCTAAAGTGCGCCTGCA

BPB-4184

TGCAGTGCAAAACCACGGGTGTACAATGATCCTTTCAACAATCCGTTAGTCAAGATCGATGAAGGTACTTCTACTGCTCA  
AATGTTTGGCAAGGAGTACCGCATGGCTCCTGTCCGGCTTACAAATGAACAACAGACAATGCATCAGAAAAGGCGATCAC  
ATGCATATCAGTGGAAAAGGCCACCGTGTCTTAAAGAAGGTGATCCCTGCCACCAGATGTCGATCCAGAGACAGTT  
AGATGGATTCCAGTAAACCACCCATTTGCTGCTGGTTCAAGTAGATGAGGAGGCTGCCAAAAGGAATGTTTATCA  
AAAGGATGGTGTCCCGTCCCGTGTAAAGCCGAACATGAAGCTTTGAGGGCAAGGCTAGAGGCTTCTAATGATGTGAGTT  
TTTGCAATAAACATGATACTCTGAACCGGCCAAATGCTACAATGCAGAAAGACTTGTGCTGCTACTTATTTTTAAATGTA  
GTTCTATATATGCTGTTTGCAGACCTCTCTGCA

BPB-8949

TGCAGGCGGGCTAATGGGAACCATCCCGAAAATCAGACTATAGACCAATCCAAGGTACGTAACAGATAAGTACTTCCCGAT  
TCCCGATTTCCTACAATTGCCCTTGCTTTTTTTCAGGTCCCAAACAGGCCATTTGCGTATTCCTGAACATTGATTGTTTTCCAT  
CAAGCGTGCAGCTCGTCTCCCTGTCTCGGAATTGTACACTCTTATAGCCTTGTCGAATTCCCTCCATCTCTGGACAGTTG  
GCGCATAGATCTATGCACATAGATCTGGTAAAGTAAATGCAAGATGGATTTTGTATTTTTTACTTATTTTTTGTGTTTCAT  
ATGTTGTAGGTTGCCATTGTACGTTCTGTATATATATATCTTTTCCACTTTGGATATAGGTAATTCAGCCCAAACAAAT  
TCATGACACCTTTTTCTATGTGAATTTATAGTTACCTATTTATTTTATTTTGTCTGACAAAAATTCACCAATTCCTCTTAAT  
TTAAATCACTGCTCTTGAGTGCATAATTTTTGTACCAGTATAAATGATCAGCACTCCAAATAGTGTGTTTCTAGCAGAA  
TAATACGCAGAAGTGATTTTTTCCCGCCTGTGCAACATTATCCTTGTTAGAGCTTATCTTGTTTTCTTTTTGGCATAGC  
ACATGACTAGTTCTTGTTTTCCATATATTAGATGGCGCCTCATGCACAGATAACTTTATTGATAACCTCTAACTAGTCCAC  
TACTATGATTTTAGTTTTTCTTTTTCTTTCTATCCCTAGCCATATGATGTATTCACCATTTGTTTTGGCATGATCTG  
CA

BPB-3131

BPB-5755

TGCAGCAGCCATGGAAGTCCATGCTGTTACACGGAACAGCAACGTCGGGATTTATTGCCATATAGCCGTGCAGTTTGAAT  
AGTAGTACAGTATGAAGCTGTGCATTATTTGTGGGCAAGCGGTCCGGCTTTTCTGATAATTGGTGCAGTTTCTCTTGACG  
GAGGTTTGGTTTCCGTGAATCAATGCCCTTAATTCGGCAAGCTGCAACCAATCCGATCTCATGAGTTTAGAGTATATACT  
TCTGCCAACAAGATCGGAGAGAGTTCCTTTTGCAGGCTGTCAGTTAGGCTGTCGAGCACTGGCAGCTGTTCCATTGTGCT  
GGAAATAAGTTTCGGGTATTTTTCTGCA

BPB-4228

TGCAGTACAGCAGTTGCTAGTAACGAATCAAACAGTGTTCAGAACCCTAAAACACTGCCTCCTCATAGAGTATTGGATC  
ACTCTATTCACTTCGTACTTGATGGTATGCCGTCAATTGCAGACCATATAGATACTCTCATGTGTAGAAGGATGAAATA  
GAGAGACAGGTGGCAGAAATGTTGAAATCTGGTCTGATTACACCCAGTGTGAGTCCTTTTGCTTCTCCTGTTTTACTGGT  
CAATAAAAAAGATGGAACATAGAGGTTTTGTGTGGACTACAGAAGAATAAATGCTTTAACCATTAAAAAAATCCTATGCC  
AGAGATTGATGACTTGCTTGATGAATTACGGGACACTAAGTGGTTTTCCGAACCTGGTCCCTAGAGCTGGATATCATCAA  
TCAAATGAGGGAAGAAGATGAATTTAAGACTGCTTTTAAAACACACCATGGACACCTTCAGTTCAGGGTTGTTCCATTT  
GGTCTGACCACAACCCGAAACACTTTTCAATGTGTGATGAATTTTGTGTTTGCAGGGCCAAACAGAAAATATGTGTTGGT  
TTTCATGGATGACACATTGGTTTTCAATCAAACATTTGAGGAACATTTAGAACACCTGCA

BPB-4093

-----  
**CHR. 3H**

BPB-8547

NNGTGTGCTGGAATTGCGCCCTTGATGGATCCNNTGCAGGCGTGAGGATTGCCTCATACACGACAAGGAAGAAGATCGTGT  
CTGGTATGGCGAGGAGGTGAAGCGCATTTGATGGTGAGGAGCTGAAGCTCATACTCCATGCAGGTTTCGGAGAGCAGCACAT  
GACGCCAACCACATGCGATTGCTTTCTGGCCCATTTGGAGCTACCAATGTTTCATGTGAGTTGCTAACGACACCATCAGCGGT  
CAGTGGGTTTACCCCTCATAGTTGGTTTCGACTCTTTTACACCACCTCATATTGGAATGCGCCAAGAATATTTGTTTTCACTT  
CAACATCTCATAAAGTACTTTTTGGGAGTATTAACCTACTGTCCGAATGTATTGCTACTAACTAGTCCCGGACGGACTGCA  
TAGATATAGCTGATTAATTTACTACACTTGCAGCTGCA

BPB-0634

TGCAGTGGAGTGGGACATTGCTGCTCGCCACGAGCCAAGTATAGCGGTGCTGCAATGGAGCGGGCGCTGGTTCCGACGGT  
GCGACCAGGGCGCTTCAATGGCATGAGCGTTGCCGTGCTCGGCACGACAAGTCAAGAGCGACAGTGTGCTGCCGGTAGC  
GTTGTAATGGAACGAGCGATGGCGCTGTTGCCATTGGATCATTTGGTGTGCAATGGAGTATTTGCGCATGGTGGTGCCCTG  
CGCGACGATGAAGCTTCAATGCATGGCTGGTGTGCTATGGAGCATCGCCGGTGTGCTATGGAGCATTCGGGAGAATCA  
CCGGTGTGTGCTATGTAGCATCCTCGGCCGTGGGGGCATCATCAATGCTGGAATGAGGCATCCCGGAGAGTTGCCGGTGT  
GCGCTAGAGTGTGTGCGGGCCGCCGAGCATCACTGGTGTTCATGGGATGATCGCAAGCCTGCA

BPB-6797

TGCAGTAGCTGCTAATTTTTTTTTGATGGTGGAGGGGCACGTCCATCTTTGATGGTTGCCTGTGATTTTAGGTTCTAAGTG  
ATATCTGATTTGACATAGTACTGATCCTAGTTCCCCCTATGTGTTTTTATATAGGCGTTCTGCAAAGAGTATAGACAGGT  
TGCTCCTCCTGTTTCAGTCGAGGTGTCTTTTTGGATCCAGAGATGGCTGGCAAGTAGACAGACAAGGAGCGCAATGACCT  
TTTTAAATTTTGTGTCATTACTTGTATCAGTTTCGTTTTTTTTTTTTTTTGTCT

BPB-6884

TGCAGAATGGTGCCGTAACCTTTTTGATGCAGAGGCCGGTGGCTGTGTTCCCTCCTTTAAAAAAAGGGTGTCAAACTTTT

TATTTGCTCCCTACATTCCTTATAGTTGTTTCGCTATGACCAAGGAGGAGCTTCGCGCGAGGGAGGTGTACGGGTAGTT  
 CAATAACTTCCCAGTGATGGGATAAGCACCCGTGGATGTGTAATTAACGAGTGGGGCAGAAATCAGCAACTCGGGTGCAA  
 AATGATAAATGGGACTTAGAATTCGAAAATTTGCTAAATACAATACCTTAAAGAATGGAATGGAAGCAGTAACGTTAAGT  
 GAACTTTAGCGACAAACGCAAAGGTGAATTCAGGAGAAGTCGCGAGCAAATGAAATCAAATGCATGAATGGAGAGGTGG  
 CTAACCTTTGATTTTCNNGCCTTTTCTTGATACGCTTTGACAAAAGTTTATGATAACTTATCCGACTGAAAAAGTATT  
 TAATTTTCTTATGAATTCGACAACTCATCTCCGGACCACCTCACTGTGGGTCTTTTCCCTTCTTCTTTTCTTAGCAGTT  
 GGTTTCACTAGAGTGTCCACTGAGTTGCTAGGTGGCTTCTTCGCGTCTCTCGAACGAAGAATCCTGACCTGAGTCTTCTG  
 GATAACGTTNTTGGTCTGAGTAACGTCCTTAACAGAGGCAGAATTATTTCTATTGTNNNTCGGCGCGAGAAAATATATT  
 ATTGTAGGAAAAAC

BPB-2018

TGCAGAGTTACCGAGATCTATTACAGGCACCGTGTGCATCAACATCATCCCACTTGTGGAACCATCAACTCAGTGCCCATTT  
 TCAGAAAGCTCATCTCAGCAAACTTAGCAACTGATGTGTACAAACAACCTCAATCATCACAACAAGTTATGACCATGGTAC  
 GTTGTTCAGAGATTTTACACCAGTAGATCAATACCGTATAGTAGGCCCAGCCTCTTGTGTGAGTAACAACGCTAGCCAA  
 TTCTGGTATATGGCGGTATCTTATGCATACATATCTGATCTTCCACGAGACTGCATGGCTGTTTCTAAAGGCATCCCCGT  
 ACCCTTCACTTATGATAATCATGGCCCCAATATGATTACACCTTNNAGGCAAATACAGTCCCTCAACTCTGGAGAGACAA

BPB-44917

TGCAGCTGTACTGGTACTCGGAAGAACAGATACGGCAGGAGGTCAAATTCCTTAGCTTGTAGTTTTATGCTGGCCTTCCAA  
 GTCATTTGAATGTTATTTTCACTTTTTTTCGAAAGCATCTGAATGTTATTTATATGGCTAAAATTAACGCAGATTAAATGGG  
 AATGCCGTAGCAATTTGTTCTCGGTCTACAAGTCGTTTTGACGTTTACATGTCTGGAATTTATGCTGTAGAAATTCGGAT  
 GACAGATACTGAACTTTTCTTGCCCTGAGAGCGACGTTGCTGCTGCTGTCAGTTATTTATAGTGGTTCATATGAGGCAG  
 AGGACTCGTCGTCCTTGCACTGCTTGTCAATCACACTCTTAATTGCAGGAACGCATACGGCAGGAGGTTGCATTCTTGGC  
 TTGTACAGTAGTTTTCTGCTGAACTTCAAAGTCATTTGGATGATTTTTATACGGTTGAAACTGCCGACGATTAAATCGGA  
 ATGCGTGTGACAGCAAAAAATCAGCTTAATCTTTCTCACCTGAGCTGACGGTGAGGTTGCTGCTCCTGTCCACTAGTTT  
 GGTCCATATGCAACAATGGACTGCA

BPB-7235

TGCAGCTATTCATCAATGCAATCAAACCCATTTACATATGACCTAGCTGTCCACCATAAAGGCTTCAGGAATCCTCCGG  
 TGGGAAAGTTGCCAAGAGCATGGTTAATAGTATAGCCAACTGCTGGCTATAAGCAGTCTTATAGTTTCATCTTATAGCTA  
 GTTTGTATAATAGTTAGCTATAAAAAAATACAACATTTGTGCATATATGGCCACCTTTTCATTCTCACAAAACACCTAGG  
 AACACGTGCTAGAGCTGGCTCTTTCACGAAGAGTCCGCTTCCCTTCTCTCTCCTCTTCTCTCACATTCAACTCAGCAAAAA  
 TATAGTATTTTAATTCCTTATAACCTGCTGACTGTACCTTACTGTACTTGCTCTAAAAAAACGTCTCGTTTCACGAGGAG  
 TCCATCAGATTGGGTGCTGCTCTCTTCTTGTACTGCTCCTGACTCGCACGCGTCATCCTCACCTTGAAGCCCCATGT  
 GCGTCTCTGCA

BPB-42312

TGCAGTCCGTTGTGTTATAATAGGGCTAAGCTGGCTCTGTTATGGAGGAGATGCTTTCTCTACCACAGAAACCTTTTATA  
 CTCATAGGCCCTCTTGGAGGCTCTAGCAGCAGCGTAAGGGATGGCTGCTGGGGGTGATTTTGTCTTCTTAAAAAGCAAAT  
 ACAACATGTTCCCTCATATATCTTCACTTGTACAATGTACTTGATATGTGACATAAGGAACTCAAAATCAAATATATAT  
 GCTTACTTTTGTGGGGCAGCTATTCTTTTGGGACTTCAATACCAATATTTATCACATGTTGGTGGGTGATCAGTATAAT  
 CATATGACAGTTTTCACTTTGTCACTCACCTGCAATCACATTTATATAAATATCTTACTACCTTGCTGCA

BPB-1114

TGCAGCAAGGTAGTAAGATAATTATATAAATGTGATTGCAGGTGAGGTGACAAAGTGAAACTGTCATATGATTATACTG  
 ATGACCCACCAACATGTGATAATATGGTATTTGAAGTCCCAAAAAGAATAGCTGCCCCAGCAAAAGTAAGCATATAATAG  
 TTTGATTTTGTAGTTCCCTTATGTACATATCAAGTACATTTGTACAAGTGAAGATATATGAGGAACATGTTGTATTTGCTTT  
 TTAGAAGAAACAAAATCACCCCCAGCAGCCATCCCTTACGCTGCTGCTAGAGCCTCCAAGAGGCCATGAGTATAAAAGG  
 TTTCTGTGGTAGAGAAAGCATCTCCTCCATAACAGAGCCAGCTTAGCCCTATTATAACACAACGGACTGCA

BPB-2744

TGCAGAAGTTACAATTGGGACAATGGTGTGTTGGAGACGACCATGACCCTACGTGCGTGGCAAACGGGGAAGAGGAGCA  
 TGGACCTCCACTACGTGCATACACCGGTGGCGTGCCCCGGGATTTAGACGGGAGGGAGAGGGGCAGAACATGGCCGGGT  
 ATGGTCTTGCACCAAGCCCACACAGCGCCACACTTACTTACATGGAAGCTTCATAACTTAATAATGTAATTAATACTTG  
 ACGGATCATTTGTTTCTGGATTTTTCTTTTTCAGCGTACGTACCAAGTAAATAAATTTGTAACCTTAGAACAGTACTGCCTACC  
 TTTTTCATGAGTATACTAGATATTGCTTCCCTTCGTTTAAAGTATTTGTGCATAGAAATGAATGTATCTAGATGTATTTTA  
 GTTTTAATTAATTTTATTTCTATACATTTGCGTGACAGGTAATTCGGGACGGAGGGGGTATTTTTTTTAGCAAAGTATAGT

AAGTGTGTTGTTTGTTTAACTGAAGGTCGTTTTTGC GATTTGTCCTCTTTGTAACCGACTGCA

BPB-7965

TGCAGCCACAGCGTTTCCAAGGCCCTCGGTACAGACCCCAGCAGCTCATCAGCCCCAAGGCCACGTTTCATGTCACCAAGA  
ACGAGCTTGTCTGTGGCGTCGTCGGGTTCCCTCGCGGCATGTTTCCCTCCTCTCTCTGCTGATCGTCATCGCAAAGAAGGCG  
AGGAATGGGGCGCGCCGGCGACCGATCCGGAGCCGCGAGACGATGAAGATACCGTGCTGAAGGTTGCTGAGCGGTGCCCT  
CGGCTGCTTCTTTAAACTTCTGTTATGCGCGTGATGGGCTCGGTCGATTGTTAGCAGTGCAATTTACCTTGTTGTTGGAT  
TGTATCATTGTACGCACTGCTACTGTAGCAGTGGTCTGGTACACTGCCCCTTTTATTCTTTTACCTTGTTGTTGTTAGTAT  
CGCTTTATAATCCTTGAGCTTACACCTCGGAGAAATCTGTAACCTGTGGTTGTTGTTGAATAAATCTTACTGCACTGGCAA  
TACTACTAATATTGTTTCTATATTAATCGTATTTGCAGCTTGTGCTTTTTCTTGGTGTAACAGTCGTGCACTGTCCTACT  
GTTTGCATCGCTTTTATCTCTATATAGCCTATGCTAATTTCCACGTTATCTTCCATAAAATTTACTCGTATCTGGGATTCT  
ATTACACTGTGGAGATCCAGACTCCTTAACCATGTTACCAACCCGTATCAAATCCTGAATTTGTCTGTCCTTCATCACT  
ACAATAATCTTATTGTTTTTGGATGTAAAAGCAACTCTTAACTTTTTCTTAATTAATAAATGAGGTAAATCTTTTTGCCTC  
CGTTTTTTTTTAAAGCTGTTATTGTGCGCTGCTAAGCCTTAGCACCGGGCGCCCGGTGCTGCTCTGTGTTTCTGACCGGTG  
GCCGGTGCTAGCG

BPB-1264

TTGGGCCCTCTAGATGCATGCTCGAGCGGCCNCCAGTGTGATGGATATCTGCAGAANTCGCCCTTGATGGNNCCAGTGCA  
GTCCATTGTTGCATATGGACCAAACCTAGTGGACAGGAGCAGCAACCTCACCGTCAGCTCAGGGTAAGAAAGATTAAAGCTG  
ATTTTTTGTCTGTACACGCATTTCCGATTTAATCGTCGGCAGTTTCAACCGTATAAAAAATCATCCAAATGACTTTGAAGTT  
CAGCAGAAAACCTACTGTACAAGCCAAGAATGCAACCTCCTGCCGTATGCGTTCCTGCAATTAAGAGTGTGATTGACAAGC  
ACTGCAAGGACGACGAGTCCCTCTGCCCTCATATGAACCACTATAAATAACTGGACAGCAGCAGCAACGTCGCTCTCAGGGC  
AAGAAAAGTCCAGTATCTGTATCCTCGAATTTCTACAGCAATAATTTCCAGACATGTAAATGTCAAAACGACTTGTAGAC  
CGAGAACAAATTGCTACGGCATTTCCATTTAATCTGCGTTAATTTTAGCCATATAAATAACATTCAGATGCTTTTCGCAAA  
AAATGAAATAACATTCAAATGACTTGGAAGGCCAGCATAAACCTACAAGCTAAGAAATTTGACCTCCTGCCGTATGTGTTCT  
TTCCGAGTACCAGTACAGCTGCA

BPB-44182

TGCAGGAAATACTGATACAGAGATAAATCACCAGAAAATCAGAATAAGGTAACCAACAGATTGCTGTATTTTTAACTATT  
ATTACAATCCAAGTAAAGTTTAATGTGATTCTGATTACAAATATCTAGTACTAGTATTACATGGCGCCGGATCATTTATTC  
ATACATCAGATGATCATGTAGTGGAAAGACCGAAATATATTGCATGCTAGTGATATGCATTGATGTGCAACAGATGGACG  
GAGCAGTACATGCCCCCAGTATTTACTAAATTTGTGGCAGCATGTTTTCCATGATTTACACCACAGGGTAATTTTCAGATG  
TGATGAATGGCTTTGGGGGCATCTGTAGATTCTGCAACCTCGCGGTTAACATGTTTACCACCTTTGTCAATTGATGGCTGA  
TTCTTCGGGTTCCACTGGATACACCATAGTCCCACAATGGCAAGTTGTCTGACCTTTTCTTGCTCTTCCCTGTGCCCAGTC  
CAAAGTAACTACTAAGTCCCTGCCACTGCTTACTTTCTGATAGATCCACTCCGGGAGATACACATCGTTCTGGCTACCAA  
CACTTGGGTCCGAGTTCCCTCTTCTACTCACCATTTCTAACACTAGCATGCCAAAACCTGTATACATCAGATTTGTATGAT  
ACTCCCCCAAAGTTCCGTGAGTATAGCTCCAGGGCAATGTAGCCCATCGTGCTCTTTGCTGCA

BPB-3689

TGCAGAGCTTTTTCACAGAGTGGAAGGTACATGTAATTAAGGGTCGGCTGGCAAAGGGCACGGTATACCGACCCGACATAG  
AAGAGCCCGAAGAGGGTAGGTGGCATGCCACAACACTCGCTGACCAAGCTAATGTTTCCCTTGGCGCCAAGTGTTCGTTTG  
GATCAGGATGTTCTAATTGCCATAGTGGGCCGCTAAGACAACCAAAAGCATCGGATATGGGGAAATCCCGAAAATGGACA  
GGAATTCAGCGTGCGATGAGTTTTGATCGAGCCACGTGTCAAGCCAGAAGAGGGTACCGACAACATCACGTATGAAGAAA  
GTGATACCCAAGTGAATCCCATTTGTTGATCGACTGGGGAAATTTCTAGAACCGATACCCCTCCACGGATCACATGCCAG  
AAGAGGGAGACCCTGTGGGTATTTGGCTTTTATAAGCTGCA

BPB-7624

BPB-3025

BPB-2891

BPB-1799

BPB-2531

BPB-5977

BPB-8515

TGCAGTACAACGGTAGGGACGCTGACGGTAAGATTGATGAAGAATTTCGAAGATAAACCGATAAAATAATTTTTATATAGAA  
CAAAGCTAATCTAGGGTTAATATGTACTCCCTCCATGACAAAAATATAAGAGCAGTTAGATCACTAAAGTAGGGATCTAG  
ACGCTCTTATATTTTTGTACACGGGGAGTAGTAGAATCCTACGACCAGTCAAGGACTATGTATCGTATTACCTTATTTAT  
TCATTCTATCCGTGTCACTAAATTATTTCTGTTTTGGTAGATGCAACATCGTTAAATTTGTGAACAGAAAGTAGATGGGT  
GTTGGGCCCTTCTGCTCTTTTTGGCACTAGAAAAATGTAATATTAAATATTTGTTTGCTGTGCTTGGATATCTATTGCTCTT  
GTCATCCTTCTTGTAATTTTTGTATTAATGCCCTTATATATATAAAAGGACACACCCCTCTCCGAAAATGGCGTTTGGTGG  
CCGAGCACCCCTGCA

BPB-3649

TGCAGAAACGAAACGATTAACCTGGGTGACAATGCTCATAACTTTTTAACATAAAATAAGATGGCGAAAACAGAATATACTAC  
ATAACAAGAAGATAGGTTAGTGCTACACATTTTATTATTTTTATCAGCTACCATAGGTATTACCCCTACAGAAGAACTCT  
CTTGGCACGTAGAACTACATTTCAATGATAGTTTCAATGTTTTTCACTTGCTCAAGTTTAAAGACAAGTCAATATGAAT  
ATGTACATATAATAATTTGATAAAAAAAAAGTGACATATACTTAGTGCAATTTACCTGATAGATCTCAGTCGTCAAGTGT  
TCGAAACAGATGGTGCAGTCAAGGGTCTCCTTCAATATTCTGACATCCATCCNAGTGTCTCCCTCTCTGATAGCTTCAGC  
ACTTCTTTTTGTTGGAGCTGCTGCCGTTTCATCGCCNAAAAAATCAAGGGTACCAGAACTAANTTGCTGGCTGTGTGCTGC  
TGGTACTACNGACCGAAACCAAGATCCNAACCTCTTGATCCACACAACCTCACCGCTCCNTTCTCCGCCCTGTACCACAA  
GAGCACATGANATACTGATAAAATTC

BPB-8441

GATCCAGTGCAGCGCAAACATTTGCGTTAGATTTACCAAAAAATCATTGGAAAAAGTGCTAGAAAATCCAAAAATTTGAG  
TGCAACGCTAAAGAAATCATGCGGATACGCAGTCTACGAAAGGGCGAATTCAGCACACTGGCGGCCGTTACTAGTGGAT  
CCGAGCTCGGTACCAAGCTTGGCGTAATCATGGTTCATAGCTGTTTCCCTGTGTGAAATTTGTATCCGCTCAA

BPB-0945

TGCAGCGAGTGACCATCCCAACCGCCCGGATCTTCGTATCCGATACATCGAAAAAGGTACACAACCTGCACCTCCACGCAT  
CAAATCATGCGCTTCCCTCCATTCCCTGTGATCCACCACGTGGAAAAATTCATGCTCATTCCCTCTGATCCTCTCTCTATTT  
CTCAATTTAGGCAAAAAGAACTTGCAGGCGCTGAGGTTTGCTTCTTGTGCATGGGATTCCCTCTGTTCTACACGCATTGTT  
TTGTTTGCCGCCGATTGTTTCAGATTTTCTTTTCATCAAGCAAGTGTTTAGCATTCAACTTCCTTTTCTTTCAATTTCA  
GATCAAGGGCTCGAGTTATCGAAATTATCCTGCA

BPB-1852

BPB-6322

CATGGATGTAGAAGCACTACAAATCCATGGCACACGGCGACAACCATACAGGATTGATGTCACTGCCAAGAAGCTGCACT  
GGATCCGGATACGCAGTCTACGAAGGGCGAATTCAGCACACTGGCGGCAGTTACTAGTGGATCCGAGCTCGGTACCAAG  
CTTGGCGTAATCATGGTCATAGCTGTTTCCCTGTGTGAAATTG

BPB-6127

TGCAGAAACGAAACGATTAACCTGGGTGACAATGCTCATAACTTTTTAACATAAAATAAGATGGCGAAAACAGAATATACTAC  
ATAACAAGAAGATAGGTTAGTGCTACACATTTTATTATTTTATCAGCTACCATAGGTATTACCCCTACAGAAGAACTCT  
CTTGGCACGTAGAACTACATTTCAATGATAGTTTCAATGTTTTTCACTTGCTCAAGTTTAAAGACAAGTCAATATGAAT  
ATGTACATATAATAATTTGATAAAAAAAAAGTGACATATACTTAGTGCAATTTACCTGATAGATCTCAGTCGTCAAGTGT  
TCGAAACAGATGGTGCAGTCAAGGGTCTCCTTCAATATTCTGACATCCATCCAAGTGTCTCCCTCTCTGATAGCTTCAGC  
ACTTCTTTTTGTTGGAGCTGCTGCCGTTTCATCGCCAAAAAATCAAGGGTACCAGAACTAAATTGCTGGCTGTGTGCTGC  
TGGTACTACAGACCGAAACCAAGATCCAAACCTCTTGATCCACACAACCTCACCGCTCCTTTCTCCGCCCTGTACCACAA  
GAGCACATGATATACTGATAAAATTCATGGATTGGAAGTGACACTGCACTG

BPB-7199

CTTCCAAATCCATGAATTTTATCAGTATATCATGTGCTCTTGTGGTACAGGGCGGGGAAAGGGGCGGTGAGGTTGTGTGG  
ATCAGGAGGTTTGGATCTTGGTTTCGGTCTGTAGTACCAGCAGCACACAGCCAGCAATTTAGTTCTGGTACCCTTGAGTT  
TTTTTGGCGATGAACGGCAGCAGCTCCAACAAAAGAAGTGCTGAAGCTATCAGAGAGGGAGACACTTGGATGGATGTCAG  
AATATTGAAGGAGACCCTTGACTGCACCATCTGTTTCGAACACTTGACGACTGAGATCTATCAGGTAAATGCACATAAGTA  
TATGTACACTTTTTTTTTTATCAAATTATTATATGTACATATTATATTGACTTGTCTTTAACTTGAGCAAGTGAAAAAC  
TTTGATGAACTATCATTTGAATGTAGTTCTACGTGCCAAGAGAGTTTCTTCTGTAGGGGTAATACCTATGGTAGCTGATAA  
AATAATGAAATGTGTAGCACTAACCTATCTTCTTGTATGTAGTATATCTGTTTTTCGCCATCTTATTTATGTTAAAGT  
TATGAGCATTTGTGACCCAGTTAATCGTTTCGTTTCTGCACTGGATCCNTCAAGGGCNAATTTCTGCANATATCCNTCACAN  
CTGGCGGCNGCTCGAGCATGCATCTNGAGGGCCCAATTCGCCCTATAGTGA

BPB-7448

BPB-6978

BPB-6468

TGCAGCACGACACATGTTGTCAAACCATCTCTTCTTTAGTTTCTGTAACAAGACTCATGTTGCACAACCTTGTTCATA  
ATTTTCTACGACAACGGTGTGTGTGCAAAATTTACAATAACATCTCCATTAAATCTAATTTTGTGTAACAAGATCCATGT  
TACAAAAATTACAACATTATTTTTCAGCTGCCCACGCAGTTGCGTAGTCGTCGTTTCGGTGTTCATCATTTCTGTAACAACATC  
GTTGTTACAAAGATAAGATGAGAGAGAGATATGTGGTCCAATAGGACACATGTCAAGCAACGCAGGCGGTGGATGCCACA  
TTTTTGATCGGCCGGTTGATCATAATCATTTTCTCATATTTTTATTGATCTGATGTATGACCAGCATAAAACCATTTTCCCT  
GAAAATGTTTCATCAATATCGTTGCGTGATGGTCTAGCATAACCCATCATGTGCCCATTTCTATAACAGGCAATAAATTTGGT  
CATCGTCTGTCCCTCTGTGCGCCGTCCATGCATGATGATGTACCATTTTTAATCCTTTTTATGGACCTACTGCTGCGCCATAC  
GCGAGAACGAACTAGAAGTTGAGAATTAGTGGTCCTAGTATGGATGCTCATCAGTCATCAGCGGCACGATCGACCATATT  
CCAGCAGCTCATGAGTCATGAGAAGCTCCTGTCCCTACTCCCAGCCAATATATAGTTGAATGCATACGCATGACATCTCT  
CGACTCTAGTTGATTTCGCCCTCTGTGAATCATCACGGTTCGGTAAAGTTCACCTGAATTTACGGGACCAGCGTGTCCGCT  
ACGGCCGGTGTTCATCACTCACGGCGAGTCCGGAGCTGGCGAGGAACCTAACTGTGCAATCTTCCACCGACCTGATCGAT  
CAGTCAGTCACACCGGTTCTTCTGTGGTTTCAGATGCGCCTTCGCTCTGCA

BPB-48285

TGCAGCTCGTGTCCACAGGAAGTAAGGAAACCACTAGGATGCGTCTCCAGCACCTCACCTGCCCCGATCCCTCTCGTATGC  
ATTGCGCTCGGATGACCAGCATCACCAAATCAGTGGCTGAGCTATTGGTGGGTGGCGCGCTATGCTCGTATCTCCGGTGG  
TTCACAGAGGAGGACGTCAACTCCCAAATTTCTTCTCTGCATAAGCAGGTGCGCTTTAGTTTTCGCGCCTTGGGGACACGA  
CAGCGCAATGTTCTTGGTAACAGTGCCTTGGGATCCTCCCGTTATGATTGACAGCATGAGCAAAGAGTAGTACGTTGTGA  
TGCCCGCATAATAACTGAATGCCTTTTTTTTTAGACAAATAACTGCATGCTTAAAAACCCCTCATATGCCACCACCACCTCTT  
GAAACCAAGTGGCGGATGCGAGGCACAATTTCCCTGGTGTGGCGGAGGTAAC TAGCATATGTGTCTCAGCTCAAATCATCAAT  
GAAGAATCATGTAGACCTAGCATAACATGACACGAGTTAGGTATGGCAGCAGCCAAAGCTTGCCAGATTGCTGGCTTCGCC  
ACTGCTTGAAACTCCCAATGTGGAAGTTGTGCTTATAACACCATTTATAGTTTTTTAGTTGAAGTTTGGGGATAGGGGATG  
CAATGATTGGTAATCCACCCTGACTGGACTGAGTCCTTAAAACTGCA

BPB-7350

TGCAGTTACCAAGGTTGGGCCTGAATTTGTTGGTTGTAAGAAGGGTGATCCTGTATGTAATGAGTTGGTTGCTTTTCCCA  
AACTTGAACGGTTGATTTTTCATTGATATGCCCAACTGGGAGGCGTGGTCCTTTTTTGAGGAAGAAGTTGTTGCTGCTGAT  
GCAAGGGGAGAGGATGGAGCCGCTGAGATTCAAATGAGGATGCCCAATCTCCAAGGTTGCAACTGCTGCCTCGTTTGGT  
ACTGTTGACACTCGATGGTTGCCCGAAGCTGAGGGCTCTCCCGCGACAACCTTGGAAGGACACCACCCGCTGAAGGAGC  
TCAAATTAATTGGTACAAACAGCTTGAAGGCCGTGGAGGACCTCCCGTTGCTCTCTGAACTCCTTAACATTTCAGAAATGT  
GAAGGCCTGCA

BPB-8172

TGCAGTCGCAAATCTTACCATGACTTCGAGGCATATGCTTTTTCAGCAATCTGGAGGTACTCATCCCACAAATCTATAGTCA  
TGACATAGTCAAGCATCCTTACAGGAGGCGTGCACTTCCCATAACTAGAGAACACAATGTTTCCAATAACATCCCGCTTG  
ATGCAATCAACGTAGGCCCTGACACCTTGATATATGCGTTAGAACACATGTTCTCGCATCTAAACGACGGTGGAATAGG  
GTTCAAACAACACATCAGGGTAAAAGTAGTCGTCGTACAACATAATACGGCCATGTGTCATCTGTGCGTTGAACCAAGTGT  
AGTTGGGAACATGCTCCGCCACACGTTCCACATCTGCA

BPB-1814

TGCAGGGAAGGAACAGAGAAGCAGCCGCCAAACTAAGTACGCCACGGGCTTCTGAAGGTGAAGAGGAAGGTGAAGGTATG  
AGGAAGTATCGATCACCCCTTCTTGCAATTGTTACTTATAGAACACAATATCCATGTATGCAGTTTCATCATGACTGGAGT  
GTGTGCTTTTGGTGTCTCTGAGATTTACTACTTACTTATTTGGGTGGCATGCGAATGAAATGTTTAAATGCAGCCGAGCAT  
GTTTCTGGGGACAACCACATACAGATTGGAAGCGGGCTGCTTGAGATCCAGAACAAAGAAGGTCAAGGTATAAAGAAGTA  
TTGATCACACAAACCTTGTTGCAATTGCTACTTATAGAACACATTTTCCATGTATGCACCTTTCATCATGAGTAGAATGTG  
TGCCCTCATTATCTGTGATTTATTTGTTACATTTTCGAGCAATGTGCAAGTGAAATGTTCAAATGCAGACAAGTATGTTTCT  
GCGGACAAGTATGTTTCAGATTGGAGGCTGGGAGCAAGGAAGGAAGAGGAAAGCAACTGTGAGTGTGACACCGAACGGAGT  
GCAACCAATTGGAATTGAAATCCAGAACAAAACAAGTCACGGTATAGAAAAAATAATCAGTCTCTTAGTACCCGCACA  
TTTCAAATAACACAATGAGTTTCTTGATAATCTTTTGTATTATTGCAGGTGAGTGTCTGAGAGCTGAGAATCAGATGGTG  
AGGCTGCACTGGNTCCATCAAGGGCGAATTCCAGCACACTGG

BPB-2548

TTTTCCAGTCACGACGTTGTAAAACGACGGCCAGTGAATTGTAATACGACTCACTATAGGGCGAATTGGGCCCTCTAGA

## Supplementary Material

TGCATGCTCGAGCGGCCGCCAGTGTGATGGATATCTGCAGAATTTCGCCCTTGATGGATNCAGTGCAGGGAAGGAACAGAG  
AAGCAGCCGCCAACTAAGTACGCCATGGGCATCTGAAGGTGAAGGTATGAGGAAGTATCGATCACCCCTTCTTGCAATT  
GTTACTTATAGAACACAGTATCCATGTATGCAGTTCATCATGGCTAGAGTGTGTGCTTTGGTGTCTCTGAGATTTACTAC  
TTAGTTATTTGGGTGGCATGCGAATGAAATGTTTAAATGCAGCCGAGCATGTTTCTGGGGACAACCACATACAGATTGGA  
AGCGGGCTGCTTGAGATCCAGAACAAAGAAGGTCAAGGTATAAAGAAGTATTGATCACACAAACCTTGTTGCAATTGCTA  
CTTATAGAACACATTTTCCATGTATGCACCTTTCATCATGAGTAGAATGTGTACCTCATTATCTATGATTTATTTATTACA  
TTTCGAGTAATGTGCAAGTGAAATGTTCAAATGCAGACAAGTATGTTTCTGCGGACAACCTATGTTTCAGATTGGAGGCTGG  
GAGCAAGGAAGGAAGAGGAAAGCAACTGTGAGTGTGACACCGAACGGAGTGCAACCAATTGGAATTGAAATCCAGAACAA  
AACAAGTCACGGTATAGAAAAATAATCACTAGCTCTTAGTACCCGCACATTTCAAATACACAATGCGTTTCTTGATAA  
TCTTTTGTATTATTGTCAGGTGAGTGTCTGAGAGCTGAGAATCAGATGGTGAGGCTGCA

BPB-2965

TGCAGGGAAGGAACAGAGAAGCAGCCGCCAACTAAGTACGCCACGGGCTTCTGAAGGTGAAGAGGAAGGTGAAGGTATG  
AGGAAGTATCGATCACCCCTTCTTGCAATTGTTACTTATAGAACACAATATCCATGTATGCAGTTCATCATGACTGGAGT  
GTGTGCTTTGGTGTCTCTGAGATTTACTACTTACTTATTTGGGTGGCATGCGAATGAAATGTTTAAATGCAGCCGAGCAT  
GTTTCTGGGGACAACCACATACAGATTGGAAGCGGGCTGCTTGAGATCCAGAACAAAGAAGGTCAAGGTATAAAGAAGTA  
TTGATCACACAAACCTTGTTGCAATTGCTACTTATAGAACACATTTTCCATGTATGCACCTTTCATCATGAGTAGAATGTG  
TGCTCATTTATCTGTGATTTATTTGTTACATTTTCGAGTAATGTGCAAGTGAAATGTTCAAATGCAGACAAGTATGTTTCT  
GCGGACAAGTATGTTTCAGATTGGAGGCTGGGAGCAAGGAAGGAAGAGGAAAGCAACTGTGAGTGTGACACCGAACGGAGT  
GCGACCAATTGGAATTGAAATCCAGAACAAAACAAGTCACGGTATAGAAAAATAATCACTAGCTCTTAGTACCCGCACA  
TTTCAAATACACAATGAGTTTCTTGATAATCTTTTGTATTATTGTCAGGTGAGTGTCTGAGAGCTGAGAATCAGATGGTG  
AGGCTGCA

BPB-5487

TGCAGCCTCACCATCTGATTCTCAGCTCTCAGACACTCACCTGCAATAATACAAAAGATTATCAAGAAACGCATTGTGTA  
TTTTGAAATGTGCGGGTACTAAGAGCTAGTGATTATTTTTTCTATACCGTGACTTGTTTTGTTCTGGATTTCAATTCCAA  
TTGGTTGCACTCCGTTCCGTGTACACTCACAGTTGCTTTTCTCTTCCCTTGCTCCAGCCTCCAATCTGAACATAG  
TTGTCCGCAGAAACATACTTGTCTGCATTTGAACATTTCACTTGCACATTACTCGAAATGTAATAAATAAATCACAGATA  
ATGAGGCACACATTTCTACTCATGATGAAAGTGCATACATGGAATGTGTTCTATAAGTAGCAATTGCAACAAGGTTTGT  
GTGATCAATACTTCTTTATACCTTGACCTTCTTTGTTCTGGATCTCAAGCAGCCCGCTTCCAATCTGTATGTGGTTGTCC  
CCAGAAACATGCTCGGCTGCATTTAAACATTTTATTTCGCATGCCACCCAAATAAGTAAGTAGTAAATCTCAGAGACACCA  
AAGCACACACTCCAGTCATGATGAAGTGCATACGTGGATATTGTGTTCTATAAGTAACAATTGCAAGAAGGGGTGATCGA  
TACTTCTCATACCTTACCTTCCCTTTCACCTTCAGATGCCATGGCGTACTTAGTTTGGCGGCTGCTTCTCTGTTCCT  
TCCCTGCA

BPB-6825

TGCAGGGAAGGAACAGAGAAGCAGCCGCCAACTAAGTACGCCATGGGCATCTGAAGGTGAAGGTATGAGGAAGTATCGA  
TCACCCCTTCTTGCAATTGTTACTTATAGAACACAGTATCCATGTATGCAGTTCATCATGACTAGAGTGTGTGCTTTGGT  
GTCTCTGAGATTTACTACTTAGTTATTTGGGTGGCATGCGAATGAAATGTTTAAATGCAGCCGAGCATGTTTCTGGGGAC  
AACCACATACAGATTGGAAGCGGGCTGCTTGAGATCCAGAACAAAGAAGGTCAAGGTATAAAGAAGTATTGATCACACAA  
ACCTTGTTGCAATTGCTACTTATAGAACACATTTTCCATGTATGCACCTTTCATCATGAGTAGAATGTGTACCTCATTATC  
TATGATTTATTTATTACATTTTCGAGTAATGTGCAAGTGAAATGTTCAAATGCAGACAAGTATGTTTCTGCGGACAACCTAT  
GTTTCAGATTGGAGGCTGGGAGCAAGGAAGGAAGGTAAGCAACTGTGAGTGTGACACCGAACGGAGTGCAACCAATTGG  
AATTGAAATCCAGAACAAAACAAGTCACGGTATAGAAAAATAATCACTAGCTCTTAGTACCCGCACATTTCAAATACA  
CAATGCGTTTCTTGATAATCTTTTGTATTATTGTCAGGTGAGTGTCTGAGAGCTGAGAATCAGATGGTGAGGCTGCA

BPB-0527

BPB-7273

BPB-0158

TGCAGCTGGAGGATGGTCACCTGCTCCTCCGACGGCTACGTCTCCGCGCTGTACGTCTTCTCCCCGCCATCCTTGCTC  
ACGCCGGTCTCTCTCTCCGTCGAGGAGCGTCCGTGCTCGGTGTCTCTGCTTATTTCCGGACTAATCTTCTCATGTGATG  
GTCTGTGCTCACAGCGGTCTGCCCAGCCAAAGGCTCTCCGGTAAACTGTGCGCCGGCATCGGGAACCTCACGAGGCTGCA  
ATCTGTGTAAGCTCGTCGCTCAGATTTATCAGTACAGTTTCTTTGAAAAATGTATTGGACAGATGAGAGATTGCAAAGTG  
TTCAACTTCAACATCTCTCCTGTTCTTGGACAGGCTACTGCA



BPB-9746

TGCAGTTTTAGCCAAATTAAGTTTAACCACTCAGTTCTGCCTGCAGTTCATACGCATGTACAGTTGCAAGTGCTATCAAA  
CTTGGATCTGGGGGTAGAGAGAGGGGAACTCACTTGCACAAGAGGAGGGGAGTAGGAAGTAGCACTGGAAAGGCTCATC  
TGTCCTGACCACGTGAGGAGGACGCAGCCATCAGTCAGCTCGTCCATACACGTGCTCATCAGGATCACCCCTCTCTCCCA  
GCATGGCCTAGAACCCGACCCTCAGTATCTAGCTTGTCCACTGGGACGATTCAACAAAATGATTTTTCTACTATAATAAC  
GATTGTTGTAGCCATATTTTTTTTACTTTATATAAACTTTGCCCTTTTCATGAACAAACTTGCCCCCATATGCTTGCATG  
CTGGCTTCGTTCCCTGCCTTGTCATGCAAGAAGACTTGCACCAACTGTATTACAAAGTAATGATAATAAATATGCATATTT  
TGGCACGAGTATTTGCTAACTAATGAACCTCACATCTTTACTCTACTGATGACTATTCAAAAAGTGTGCATCTCCATCTACT  
GTATGAAAGCCTTATTTTTAATCTGTTGGAGGTTGAGACCGACTAACTCCGTGCCTGCCTACCAACCAAGCTTCAACCGAT  
CATTATAGTCAGTCAACTCTGATAATTTTGAGTCATCCGAAAGACCGAAATTGAACAAAAACGTGATTATTTTTACATGCA  
ATGGGATGCACAAACAGAGACACACCCAGTTGACTCGGGCCAATTTTAAGTCATCCGAAATTGAACAAAAACGTGTTGCT  
CACACGCACAGTTTGCTGCTTCAGTTTCAGTCATGGCATCCACAATTCCTTATGCATCCAAAACCTGAAGGTACAAATAGCA  
GGCAGGTGATATTCAGATCTACCTGCTGCACCTACAGAGGCGAGATGAGGTCCAAGAACCCGCAACAGCTTCTCCATTGC  
CTTCCTTGACACAACAGCAGGCACCTCACGCATCAGAGAAAGAAGAAAGCCAGAGGATGAAGAAAACAGAGGAAGAAAAG  
GTGAGGAGAGATCCATACCGAGGCTGGCTCTTCTTGGAAGGGATGCTGACCTGCGGCCCCATGGGTGGGGAGCAGTGGGG  
CTAGGGTTCCGGGCGGTGGTTGAGGTTGGAGGGGGTGAAGGTGGAGGAGGAGGAGAACTCCTCTGCCGATGCGTCGTGG  
TGGAGAAGGAAGGAGCTCCAGCCGAGCCGGCGGTGGCCTTCTGCTGGTGGCTGCA

BPB-6347

TGCAGTTTTAGCCAAATTAAGTTTAACCACTCAGTTCTGCCTGCAGTTCATACGCATGTACAGTTGCAAGTGCTATCAAA  
CTTGGATCTGGGGGTAGAGAGAGGGGAACTCACTTGCACAAGAGGAGGGGAGTAGGAAGTAGCACTGGAAAGGCTCATC  
TGTCCTGACCACGTGAGGAGGACGCAGCCATCAGTCAGCTCGTCCATACACGTGCTCATCAGGATCACCCCTCTCTCCCA  
GCATGGCCTAGAACCCGACCCTCAGTATCTAGCTTGTCCACTGGGACGATTCAACAAAATGATTTTTCTACTATAATAAC  
GATTGTTGTAGCCATATTTTTTTTACTTTATATAAACTTTGCCCTTTTCATGAACAAACTTGCCCCCATATGCTTGCATG  
CTGGCTTCGTTCCCTGCCTTGTCATGCAAGAAGACTTGCACCAACTGTATTACAAAGTAATGATAATAAATATGCATATTT  
TGGCACGAGTATTTGCTAACTAATGAACCTCACATCTTTACTCTACTGATGACTATTCAAAAAGTGTGCATCTCCATCTACT  
GTATGAAAGCCTTATTTTTAATCTGTTGGAGGTTGAGACCGACTAACTCCGTGCCTGCCTACCAACCAAGCTTCAACCGAT  
CATTATAGTCAGTCAACTCTGATAATTTTGAGTCATCCGAAAGACCGAAATTGAACAAAAACGTGATTATTTTTACATGCA  
ATGGATGCACAAACAGAGACACACCCAGTTGACTCGGGCCAATTTTAAGTCATCCGAAATTGAACAAAAACGTGTTGCTC  
ACACGCACAGTTTGCTGCTTCAGTTTCAGTCATGGCATCCACAATTCCTTATGCATCCAAAACCTGAAGGTACAAATAGCAG  
GCAGGTGATATTCAGATCTACCTGCTGCACCTACAGAGGCGAGATGAGGTCCAAGAACCCGCAACAGCTTCTCCATTGCC  
TTCTTTCAGACAACAGCAGGCACCTCACGCATCAGAGAAAGAAGAAAGCCAGAGGATGAAGAAAACAGAGGAAGAAAAGG  
TGAGGAGAGATCCATACCGAGGCTGGCTCTTCTTGGAAGGGATGCTGACCTGCGGCCCCATGGGTGGGGAGCAGTGGGGC  
TAGGGTTCCGGGCGGTGGTTGAGGTTGGAGGGGGTGAAGGTGGAGGAGGAGGAGAACTCCTCTGCCGATGCGTCGTGGT  
GGAGAAGGAAGGAGCTCCAGCCGAGCCGGCGGTGGCCTTCTGCTGGTGGCTGCA

BPB-6329

TGCAGGGGCCGGCAGGGCCGGGCAAGAAACAACATATGTGAACTGGGGATAAGCGCTGGAGAGACCCACGGCCACCATT  
GGCTGGCCGACGACTCCCTCAAGGGGGGAGTAACAAGATAATGAGGTTTTGTGGCGAGGAGAGCGACATGGGAGGCGTA  
TGATCGGAATCAAAACAAATAGTCACATGTGTGCTGTTATAAATTACGAGAGTTGATCCTGAATACAGAAAATAATTTATTT  
GTGACATTCAGTACGAACATTTGATATACATTTGTTGCTAAAGATCTGTGATCTCTGCA

BPB-1710

BPB-6914

CATGATTTGTTTTGTTCTGGATTTCAATTCCAATTGGTTGCACTCCGTTCCGGTGTACACTCACAGTTGCTTTCTCTTCT  
CTTTCTTGCTCCCAGCCTCCAATCTGAACATAGTTGTCCGCAAAAACATACTTGTCTGCATTTGAACATTTTACTTGCAC  
ATTACTTGAAATGTAATAAAATAAATCACAGATAATGAGGCACACATTCCTACTCATAATGAACTGCATACATGCGGATAC  
GCAGTCTACGAAAGGGCGAATTCAGCACACTGGCGGCCGTTACTAGTGGATCCGAGCTCGGTACCAAGCTTGGCGTAAT  
CATGGTCATAGCTGTTTCTGTGTGAAATTGTTNTCCGCTCA

BPB-3317

TGCAGATATACGTGGACGGTTGCGCTGTGTGCTGCCTGCGAGTCCCACATCGGCTGGCTGTTTCAGGGCTGACAAAAGGAA  
CCTTCTTCCGATATCCTTCTGGGGGATCCGCATTTCCCAAACCTCAGACGGTACACAATCGGCTCAGGACCGACGTTCCG  
TGTAAGGCAGCGGCCGCGGTTCTTGCGCGATTCCTCGTCATCCTTCAGCAGACCCGTGACCTATCTTCGGTGGCCTGCTC  
GTTGTAGACCTTGCTGGATTTGGCCCCGACGGTTTCTGCTCGTTGTAGACCATGCTGGATTTGGCCTGACGGTTTCATCT  
AGTATTTCCCACTGCA

BPB-9130

AGTGTGATGGATATCTGCAGAATTTCGCCCTTGACCCAGTGCAGTATGTAGGTGCAGAACTGATTGCATGAATGGACCGCA  
 AAGAGATAAAACATGCCGCAAATTTGTTCTGAAGCACAAGAGTAAACAAATTCGACTTCGAAATTCGGTTGTTCCGTTT  
 AACAAAAGGAAAAATATGCATGGAACCATCAAAAGAACTCAACAGGTGCCGCCGACGTGAACAGCAAAAGCACTTATTTA  
 TCCAACATACTCCTACACAACCTTGGCTCAAATTTGCGCACATCTATCATCAAAGATGCACAGGAAAGATAACAACGAATA  
 GTGGTTATATTCATGGAAGAAATTTCTGATATGAATCAAGTTTTCTGTATCTATGCAGATATGAATGAAAGAAATTCAGAT  
 ATCAATCTGTTTGGAGGTCGACAAAAATTTCTGACACCAAAGATCTCCATCCAATCTACTCTAAGATTATCTGTCTGTTGT  
 ATCATCCGCTGGCTCTCTTTGGCATGGATGTGCCTGAGCTTCACTCCAGACTCCAGAGTCTCGGGTGATAGTGTAGCTCC  
 TCTGCGCTACATCATGGTGATGTCTGTGAAATGAAACAGCAAATTTAAATCCAATTAGTGACAATATCACAGCCATTAAC  
 TGATTAAAGATTTCGAAGGATGCAGGTACGGATAACAAGAACAATCAAAGGCTGCA

BPB-2646

TGCAGCCACCAGCAGAAGGCCACCGCCGGCTCGGCTGGAGCTCCTTCCTTCTCCACCACGACGCATCGGCAGAGGAGTTC  
 TCCTCCTCCTCCACCTTCCACCCCTCCAACCTCAACCACCGCCCGGAACCTAGCCCCACTGCTCCCCACCCATGGGGC  
 CGCAGGTGAGCATCCCTTCCAAGAAGAGCCAGCCTCGGTATGGATCTCTCCTCACCTTTTCTTCTCTGGTTTTCTTCAT  
 CCTCTGGCTTTCTTCTTCTCTGATGCGTGAGTGCCGTGCTGTTGTGTCAAGGAAGGCAATGGAGAAGCTGTTGCGGGTTC  
 TTGGACCTCATCTCGCCTCTGTAGATGCAGCAGGTAGATCTGAATATCACCTGCCTGCTATTTGTACCTTCAGTTTTGGA  
 TGCATAAGAATTGTGGATGCCATGACTGAAACTGAAGCAGCAAACCTGTGCGTGTGAGCAACACGTTTTTGTTCATTTTCG  
 GATGACTTAAAAATTGGCCCCGAGTCAACTGGGTGTGTCTCTGTTTGTGCATCCATTGCATGTAATAATACACGTTTTTGT  
 TCAATTTTCGGTCTTTTCGGATGACTCAAAATTTATCAGAGTTGACTGACTATAATGATCGGTTGAAGCTTGGTTGGTAGGCA  
 GGCACGGAGTTAGTCGGTCTCAACCTCCAACAGATTTAAATAAGGCTTTCATACAGTAGATGGAGATGCACACTTTTGAA  
 TAGTCATCAGTAGAGTAAAGATGTGAGTTTATAGTTAGCAAATACTCGTGCCAAAATATGCATATTTATTTATCATTTACT  
 TTGTAATACAGTTGGTGCAAGTCTTCTTGCATGGACAAGCAGGAACGAAGCCAGCATGCAAGCATATGGGGGCAAGTTTG  
 TTCATGAAAGGGGCAAGTTTATATAAAGTAAAAAAATATGGCTACAACAATCGTTATTTATAGTAGAAAAATCATTTTG  
 TTGAATCGTCCCAGTGGACAAGCTAGATACTGAGGGTTCGGGTTCAGGCCATGCTGGGAGAGGAGGGTGATCCTGATGAG  
 CACGTGTATGGACGAGCTGACTGATGGCTGCGTCCCTCCTCACGTGGTCAGGACAGATGAGCCTTTCCAGTGCTACTTCTC  
 ACTCCCCCTCCTCTTGTGCAAGTGAGTTTCCCCCTCTCTCTACCCCCAGATCCAAGTTTGATAGCACTTGCAACTGTACATG  
 CGTATGAACTGCAAGCAGAAGTGAAGTTTAACTTTAATTTGGCTAAAACTGCA

BPB-3113

BPB-3278

TGCAGAGGCGAAGGCGCATCTGAACCACAAAAGAACCAGGTGTGACTGACTGATCGATCAGGTTCGGTGGAAGATTGCGACA  
 GTTAGGTTCCCTCGCCAGCTCCGGACTCGCCGTGAGTGATGACACCGGCCGTAGCGGACACGCTGGTCCCGTGAAATTCAG  
 GTGAACTTTACCGACCGTGATGATTCACAGAGGGCGAATCAACTAGAGTCGAGAGATGTCATGCGTATGCATTCAACTAT  
 ATATTGGCTCGGGAGTAGGACAGGAGCTTCTCATGACTCATGAGCTGCTGGAATATGGTCGATCGTGCCGCTGATGACTG  
 ATGAGCATCCATACTAGGACCACTAATTTCTCAACTTCTAGTTCTGTTCTCGCGTATGGCGCAGCAGTAGGTCTATAAAAGG  
 ATTTAAATGGTACATCATCATGCATGGTCGGCGCACAGAGGACAGACGATGACCAATTTATTTGCTGTTATAGAATGGGC  
 ACATGATGGTGTATGCTAGACCATCACGCAACGATATTGATGAACATTTTCAGGAAAATGGTTTTATGCTGGTCATACAT  
 CAGATCAATAAAAAATATGAGAAATGATTATGATCAACCGGCCGATCAAAAAAGTGGCATCCACCGCCTGCGTTGCTTGAC  
 ATGTGTCTTATTTGGACCACATATCTCTCTCATCTTATCTTTGTAAACAACGATGTTGTTACAGAATGATGACACCGAAC  
 GACGACTACGCAAGTGCGTGGGCAGCTGAAAATAATGTTGTAATTTTTGTAAACATGGATTTTGTACACAAAATTAGATT  
 TAATGGAGATGTTATTTGTAATTTTGTCAACAACACCGTTGTGCTAGAAAAATTATGGAACAAGGTTGTGCAACATGAGTCT  
 TGTACAGAAAACATAAAGAAGAGGTGGTTTGACAACATGTGTGCTGCTGCA

BPB-2406

TGCAGAGGCGAAGGCGCATCTGAACCACAAAAGAACCAGGTGTGACTGACTGATCGATCAGGTTCGGTGGAAGATTGCGACA  
 GTTAGGTTCCCTCGCCAGCTCCGGACTCGCCGTGAGTGATGACACCGGCCGTAGCGGACACGCTGGTCCCGTGAAATTCAG  
 GTGAACTTTACCGACCGTGATGATTCACAGAGGGCGAATCAACTAGAGTCGAGAGATGTCATGCGTATGCATTCAACTAT  
 ATATTGGCTCGGGAGTAGGACAGGAGCTTCTCATGACTCATGAGCTGCTGGAATATGGTCGATCGTGCCGCTGATGACTG  
 ATGAGCATCCATACTAGGACCACTAATTTCTCAACTTCTAGTTCTGTTCTCGCGTATGGCGCAGCAGTAGGTCTATAAAAGG  
 ATTTAAATGGTACATCATCATGCATGGTCGGCGCACAGAGGACAGACGATGACCAATTTATTTGCTGTTATAGAATGGGC  
 ACATGATGGTGTATGCTAGACCATCACGCAACGATATTGATGAACATTTTCAGGAAAATGGTTTTATGCTGGTCATACAT  
 CAGATCAATAAAAAATATGAGAAATGATTATGATCAACCGGCCGATCAAAAAAGTGGCATCCACCGCCTGCGTTGCTTGAC  
 ATGTGTCTTATTTGGACCACATATCTCTCTCATCTTATCTTTGTAAACAACGATGTTGTTACAGAATGATGACACCGAAC  
 GACGACTACGCAAGTGCGTGGGCAGCTGAAAATAATGTTGTAATTTTTGTAAACATGGATTTTGTACACAAAATTAGATT  
 TAATGGAGATGTTATTTGTAATTTTGTCAACAACACCGTTGTGCTAGAAAAATTATGGAACAAGGTTGTGCAACATGAGTCT  
 TGTACAGAAAACATAAAGAAGAGGTGGTTTGACAACATGTGTGCTGCTGCA

BPB-2630

TGCAGAGGCGAAGGCGCATCTGAACCACAGAAGAACC GG TGTGACTGACTGATCGATCAGGTCGGTGGAAGATTGCGACA  
GTTAGGTTCCCTCGCCAGCTCCGGACTCGCCGTGAGTGATGACACCGGCCGTAGCGGACACGCTGGTCCCGTGAAATT CAG  
GTGAACTTTACCGACCGTGATGATTACAGAGGGCGAATCAACTAGAGTCGAGAGATGTCATGCGTATGCATTCAACTAT  
ATATTGGCTCGGGAGTAGGACAGGAGCTTCTCATGACTCATGAGCTGCTGGAATATGGTCGATCGTGCCGCTGATGACTG  
ATGAGCATCCATACTAGGACCACATAATTCTCAACTTCTAGTTCGTTCTCGCGTATGGCGCAGCAGTAGGTCCATAAAAGG  
ATTAAATGGTACATCACCATGCATGGACGGCGCACAGAGGACAGACGATGACCAATTTATTGCCCTGTTATAGAATGGGC  
ACATGATGGTGTATGCTAGACCATCACGCAACGATATTGATGAACATTTTCAGGAAAATGGTTTTATGCTGGTCATACAT  
CAGATCAATAAAAAATATGAGAAATGATTATGATCAACCGGCCGATCAAAAATGTGGCATCCACCGCCTGCGTTGCTTGAC  
ATGTGTCCCTATTGGACCACATATCTCTCTCATCTTATCTTTGTAACAACGATGTTGTTACAGAATGATGACACCGAAC  
GACGACTACGCAACTGCGTGGGCAGCTGAAAATAATGTTGTAATTTTGTAAACATGGATCTTGTACACAAAATTAGATT  
TAATGGAGATGTTATTGTAAATTTTGAACAACACCGTTGTCGTAGAAAATTATGGAACAAGGTTGTGCAACATGAGTCT  
TGTTACAGAAAAC TAAAGAAGAGATGGTTTGACAACATGTGTCTGCTGCA

BPB-9336

TGCAGATGGCGATGTGTATTCCTTTGGAGGCAACCAGTTCGGGCAGCTGGGGATTGGTTCTGATCAAGCTGAGGTGGGAA  
CTTTGAGTCCTTTTCCATTCTTATTACATAACATAATCCGATT CAGGGATACTAAGTGTGTAGCTGTCTCTTCACTTG C  
CCAAATACATAAGAATGTTACTTCTGTTTTGATGCAGACTATAACAAAAC TGGTGGATGCCCCAGCTTGGAAAATAAGA  
ATGCAAGATCAGTGTCTGTGGAGCTCGTCATAGTGCAATAATAACAGGTATAGCGGTCGTATTTTCTTCTGGAAGTAAT  
GTTTTATTTTATTTCTTGATTCTAACATTTTTTTTACGAAATTTCTGCA

BPB-18973

TGCAGATTCAGTGGCTGTTGCGAGGGAATGAGCTCGCAGTGGTGATGGCGCTCGGTGTATTTTGTGAAAAGGAGATGGAA  
GTGTGTGGGTGGGTGTGAGCTAAAAGTGACGGCGAGTCAGCAAGTGTGGCCGAGAATCCAGAGCAATTGATTGGCGTCGT  
GTCACGGTCAGTACTGTACTTAGCTAGTAATGCGGGGTGGACGGGAATTTAATAAGCACACGCTTAAGTTTGCCGGTCA  
AAGAGGGTTTTGATGAATCCGGATGCAGAGATGGCTGCGGAAGCATCGTGAACCAGATTAATTCCCCATCTGTGTGGACTG  
ATGCTGCA

BPB-0619

TGCAGATTCAGTGGCTGTTGCGAGGGAATGAGCTCGCAGTGGTGATGGCGCTCGGTGTATTTTGTGAAAAGGAGATGGAA  
GTGTGTGGGTGGGTGTGAGCTAAAAGTGACGGCGAGTCAGCAAGTGTGGCCGAGAATCCAGAGCAATTGATTGGCGTCGT  
GTCACGGTCAGTACTGTACTTAGCTAGTAATGCGGGGTGGACGGGAATTTAATAAGCACACGCTTAAGTTTGCCGGTCA  
AAGAGGGTTTTGATGAATCCGGATGCAGAGATGGCTGCGGAAGCATCGTGAACCAGATTAATTCCCCATCTGTGTGGACTG  
ATGCTGCA

BPB-2137

BPB-5396

BPB-5298

BPB-4156

TGCAGTTACACAATGTCGACAAGTATGCTCCGCTGCACCTTGTGTTCTGGAAC TGATTGTGCAACCGTGCCGGGCAGTTT  
CTTCTGATGGATGCGACTTCTCAGGTTTGGTTGGGGATAGGATAGAGATTACCCATGTTTCGTTTCGTACAGCTCCTATTG  
TTTTTGTGTCGAGTCGCGGGATGGTCATTTATTTGTATTAGCTTTGACGCACCTTCTTCTGCTTGTATCTTATTAGTGCGA  
ACATGGTTTAGCATGCAGCAAAAGTATCAGGTTATTCAGAATTT CAGAGCCCATATATTTATTGTTCTCATTTTGTTCCTA  
GAAGTGGAACCATGTTGTTTCATGTATATACTGCTATTTTTGTGTCAGTCATGCACCCATCTTGCAAATCAGCTCAAAACAT  
TTTCAAACCGATCTCATTTGATTGTGGGAGTGACAGACAATGAATATCATGGAAGGAAACCTCAGTCAGGGGTGACAGGT  
GAGCAAAGAAAACAGAAGTACTCCCTCCGTCC TACAATATAAAAGCATTTTTGACAGTATAGTAGTGTCAAAAACGCTCT  
TATATTATGGGATGGATGGACTGTTTTGTACTGGAGAATGCTTCACATTACCAAACGAACATTTACAGAGCATCTTCCAG  
TCCAGCGTGGTGGTGTATCCCATCTCTGAATGCAGAAACAATGAAGCAGAGAGGGGAGTGACAGGCTGCGTGCGTGGTG  
CTACTATGATAATACATAACTTCTTTACATGGGTTTCACTGGGCGCTGTGTCTTCTTCGCTCGTCCGACAGACCGGGCTG  
CTGTTGCTGCA

BPB-2420

TGCAGTACAACGGTAGGGACGCTGACGGTAAGATTGATGAAGAATT CGAAGATAAACCGATAAATAATTTTTATATAGAA  
CAAAGCTAATCTAGGGTTAATATGTACTCCCTCCATGACAAAAATATAAGAGCAGTTAGATCACTAAAGTAGGGATCTAG  
ACGCTCTTATATTTTTGTACACGGGGAGTAGTAGAATCCTACGACCAGTCAAGGACTATGTATCGTATTACCTTATTTAT

TCATTCTATCCGTGTCACATAAATTATTCTGTTTTTGGTAGATGCAACATCGTTAAATTTGTGAACAGAAAGTAGATGGGT  
GTTGGGCCTTCTGCTCTTTTTTGGCACTAGAAAATGTAATATTAAATATTTGTTTGTCTGTGCTTGGATATCTATTGCTCTT  
GTC

BPB-8021

BPB-8557

TGCAGATTAGCAAGAACTCTGCTTTCTGTACTTCAACTATTACTCTGTTTTCTAACATTCAAGGGAGGAATTGACATGC  
CTGTACTTCCACATGGCATTGTACTTGCCTGAACTCTTGTTCGTTTGCAGCATTTAACTGAACCACCTTGTATGAATGT  
GCTTCCACATGGCATGCTAGGTAGCAGGAGTGAAACACATTTCACTGATATGGAATAGATCGATCGTGCGAGAGCTCACA  
GTTCCCTCTGCCGCTTCCATTGCAACCAAGACGGTCAAGAATACTGTATTTCTCCGATGCCGTTTGATCGTCTTACTCCT  
GCA

BPB-5374

TGCAGAGACATACACAAAGCGCCCGCTTGCTCGACATGGAACAACACAAAGACCAGCCATAATCTTGTTCATGCATGCTCC  
CGCAGCCATTAACGCACCTGTCTAACATCACTATATGGTTTTTAAATGACTCGTCCCAGTTTTTAGTAAATGCAAATACCA  
TGAAATTAATGAAGCACCATAAAAATGATGAGATGCTCTTGTACAAGATGATAGACGTTTCTATAAAATTTGTAGATACTGG  
ATGGACAGCTAATGCATTACCAACCTTTTCATTGTGTAAACCTGACCCGCATTATAAAAGGGTGCCTACCTTGTATTTT  
CTTCTTGGACTAGGGCACAAACTAGAAAGAGGCGTGGGTGGAATGGGACAGTTCATTATGAATGAGAGACATACGGGAA  
CACCTCATCCATTATTCCTGACATGGATGTAGAAGCACTACAAATCAATGGCACACGGCGACAACCATAACAGGATTGATG  
TCACTGCCAAGAAGCTGCA

BPB-7689

TGCAGAGACATACACAAAGCGCCCACTTGCTCGACATGGAACAACACAAAGGCCAGCCATAATCTTGTTCATGCATGCTCC  
CGCAGCCATTAACGCACCTGTCTAACATCACTATATCGTTTTTAAATGACTCGTCCCAGTTTTTAGTAAATGCAAATACCA  
TGAAATTAATGAAGCACCATAAAAATGATGAGATGCTCTTGTACAAGATGATAGACGTTTCTATAAAATTTGTAGATACTGG  
ATGGACAGCTAATGCATTACCAACCTTTTCATTGTGTAAACCTGACCCGCATTATAAAAGGGTGCCTACCTTGTATTTT  
CTTCTTGGACTAGGGCACAAACTAGAAAGAGACGTGGGTGGAATGGGACAGTTCATTATGAATGAGAGACATACGGGAA  
CACCTCATCCATTATTCCTGACATGGATGTAGAAGCACTACAAATCAATGGCACACGGCGACAACCATAACAGGATTGATG  
TCACTGCCAAGAAGCTGCCTGGATCCNTCAAGGGGCNAATTCTGCAGATATCCATCACACTGGCNGNNGCTCGAGCATG  
CATCTAGAGGGCCCAATTTCGCCCTATAGTGAGTCGNANTACAATTCACTGGCCGTCGTTTTTACAACGTC

BPB-3623

TGCAGTGTGCTCCTCGGCTCTGACCTACTCATGTGCTGACTGGGCCAAATAGGCCCTCCTCTTTGCGTTGTACGGTCCAG  
CTATGCTCGGGCTGAAAATGTTGTGCAATGTTGCAGCTTCTTGGCAGTGACATCAATCCTGTATGGTTGTGCGCGTGTGC  
CATTTGATTTGTAGTGCTTCTACATCCATGTCAGGAATAATGGATGAGGTGTTCCCGTATGTCTCTCATTCATAATGAACT  
GTCCCATTTCCNACCCACGTCTCTTCTAGTTTGTGCCCTAGTCCAAGAAGAAAAATACNAGGTAGTGCACCCTTTTATAAT  
GCGGGTCAGGGTTACACAATGAAAGTTGGTGAATGCATTAGCTGTCCATCCNGTATCTACNNTTTATANAACGCTCTAT  
NATCTTNTACAAGAGAATCTCATCATTTTATGGTGCCTTCAATTAATTCATGGTATTTGCATTTACTAAAACTGGGGACG  
AGTTATTTAAAAATGATATAGTGATGTTAGACAGTGCGTTAATGGCTGCGGCAGCATGCATGANAAGATTATGGCTGGTC  
TTGTAGTTGTTCCATGTCGAGCAAGCGGGCGCTTTGTGTATGTCTCTGCACTGGATCCNTC

BPB-7827

TGCAGCAGAGCATGATGCCAAGATTTCCCGCATGATGAGGAAGGAAGGAAAGGAGACAAGTGCATGCAAGACCGTCCAGA  
GCTGGGGATCCCTGTCTGTCTGGTTCAACCACGGCAAGAACCACAAAGCCCAACATCAAACGCCATGCCTATGGCGTTG  
GAGTAAGCAGCGGAAACGCCAGTCCCTTATAGCGTTTCTTGTCTTTGACAGAGACGAGATTGTTAGGCGTATAAGCGTGGAG  
CAGAAACATCAAGGTAAATTGATGTTTTTACATGCAGCAGCAACGCCATGGGCTGTGGCGTTTCTAAAAAGGTCAGATCG  
TGAAATACTTTTCAACCGACTTCATTCTGTGTATTTCTTTTCGTCTCGTGGGTGAGAACAGTGATTTTATCCGCAGGAGTT  
AAACACATTTTCAATGATATGGAATAGATCGATCATGTGAGAGCTCACAGTTCCTCTGCCGCTTCCATTGCAACCAAGAC  
GGTCAAGAATACTGTATTTCTCCGGTGCCGTTAGATCATCTTACTCCTGCA

BPB-5312

TGCAGAGAGAAAGATAGAGAGAGAGAATCGTGCGGTTTTAAACGGGATCACCTGCGCTGTTAATTAATGAGAGAGAGATAG  
ACTACCGGTTTTGAGATGATCACCTTGTGTATTTATTTGTTTGGCGGTTATTTCTTTCTGTTAATTTTGTTTGACAGCATG  
GCAGAGAGAGAGCGAGGGAGATGAGTTAGCAGTTTTTTTTTTTTTTTTTGGAGCGGAGCAGTTGTGTACATGGAAAGTTGG  
AAACAAATCTTGACGGAATATGATCGATATTTCTTGACCAACAAGATAGTATCTTATTTGGAGGCAATGGAAAGCTAATTA  
AAACAGCGAAGATAGTAAAGACAGAGAGAAACCAACATTCATTAATAAACTTCATGAAAGAAATAACATGTACTCCCTCC

ATAAATTAATATGGCGCGTGCTACCAATCAGCCGACTGATCCATGTGTGGGATCAGCCGGCTCGGCGGCCGTTAGATCCG  
TCCGTTAGATGCGGTCTGTAGACTTGCCCATGTCGTTATCACCTAGCCTTTTCCAGCCCCACCACAGTTACTTCTCCCT  
GTACACTATTCTATATGACCTACGAGCAACACTGCA

77164

TGCAGTAGCTGCTAATTTTTTTTGGATGGTGGAGGGGCACGTCCATCTTTGATGGTTGCCTGTGATTTTAGGTTCTAAGTG  
ATATCTGATTTGACATAGTACTGATCCTAGTTCCCCCTATGTGTTTTTATATAGGCGTTTTGCAAAGAGTATAGACAGGT  
TGCTCCTCCTGTTTCAGTCGAGGTGTCTTTTTGGATCCCGAGATGGCTGGCAAGTAGACAGACAAGGAGCGCGAATGACCT  
TTTTAAATTTTGTGTGCTTACTTGTATCAGTTTGTTTTTTTTTTTTTTGCATGGACTGCTGTAATGTTTTTCAGGAATTT  
CTGGACCTAATTGTCTGATGCAATGTTCCATGAAATTGAAATCACGTTGAAGCTATGCTGAGTTTGTGACCTTATAAAC  
ATTTGGAGTACAGTCTCACACTGGCTGGAACGCTGATTCATTTTTCTCTTCTTTTTTCCTTTTGAGACTGATGAAACC  
GAGTTGAGGCTGCA

BPB-3130

GATGGTCGCTTAGTGGTTACAGCGTACTATCTCGCAGCATAGCGTTGCAAGTTCGAGTCCCGTACCCGCTGCACTTTTTT  
GATGATTTCTAGATCCGAAAAATATS

-----

#### CHR. 4H

BPB-42695

BPB-7645

TGCAGCTACCCTAGTGTGTGTGCGTGTCTGTGTGTGGCTGAGTTTGCCGTTTCTTGGATGGATCTGGCCCTCTCCCATGG  
CCATGACTCCTCCTCTCTTCTTGCCTTACTTTGCTTTGCTGTCACTCAACTTTTCTCCGTGTTTCCTTTGTGTTTTGTCTG  
TGCCGATGATCTCCGCGTTCAATTTGAGGCACCTTTGTGTTGTTTCCCTGCGTTTCACGGGGTGCCGGTGATGGTTTTCTTC  
ATGCATACNTACATAGGTTCCATCTTCCATGTGATGGTTCAACCGCATTATTTACCAGAGGCGCTACTCGTGTTTACTGC  
GTGCATTTGCTCTTGTGTACGGAGGGTTGTCTGATTTTTTACAAGGCACGGCCGGTGATGAAACAACGATGGCTTTTTGAG  
ATGTGCTATGCATGCATATGCATCCACAGATGACAAGACCGAATCAATTTCTTCAAAGCATCTGAGGCCAGCTAGCCAGA  
TCTTTTACTGCGTTTGTGTGATGAACCTGTGGGTGTAGTCTCTCCCTGTCTTGGATCTGTCTCTTCTTTGCATCCTC  
TTTTTGACGTGCACGTGCCGATGATCCGCGGTAGTCGTTTCTTGGATCTGGTCCCTCTCGATCCCATGCATGCATGGCCAT  
GAATATAATCCTTTGATCTTGGCTTTGCTTTGCTGTGATGAACGTCTCTCCATGTGTGGAGGTCTGTTTTAGTTGGCCG  
CATGCAAAGGGTTATGATGAACTTTTGCTGTACCACAAATTTCTTGTGTAAGAAGGGTTGTTTGATTTTTACGAGGCCGG  
TGACGAGACATCATTTGGCTTTGAGATGTGCTACATATGCATGCACAGATGACATGAGCGAATCAATTTCTTCAAAGTAT  
CCGAGGCCTCCCAATCCCAAGCACGACGATTTACTTTGGCTTTGGTTCCATCCTGCA

BPB-14836

TGCAGCACTAGCACTTACTAATTGCAAGATTAGAGGCCAGACATTGCCAATTTTCAGTAGCACCTAGCAGGTTAATACCA  
CACCCTTCAGAAAATAAACCCAAGTAGGCAAGTACCACCGCTACCACGCTTGGCGGCAGCACCATTTCTCACCACCTAAT  
TAAAGGAATCTCTCGTCTATGAGCTAATTGATTAACAGGTCAAGAGACGCAGCGCGCACCTGATTCGGTGGCCAACACC  
ATCGCCGCTGTGGCCGTCCGAGAAAGTGGCACTAGGCACAGCGGATTCCAAACCTGCTCTGCTCCCTCTGGATCCCACT  
ATGGTGATGGCGAAAGAGAACACCATTAATATTAACCTCCTCTTCTTATTGAGACAACACACAAGCCTTTGCACGTGCC  
CGAAGAAAAATGCCAAGAATAAACTGTCACAAACTGCA

BPB-9672

CGTCGCGGGAGGAAGATTTGGACGCTGGACATACCTTGATCCCGGATACGCAGTCTACGAAAGGGCGAATTTCTGCAGATA  
TCCATCACACTGGCGGCAGCTCGAGCATGCATCTAGAGGGCCCAATTCGCCCTATAGTGAGTCGTATTACAATTCACTGG  
CCGTCGTTTTACA

BPB-2909

BPB-40823

TGCAGTGGAGATGAAGCTTAGCATCAACAGGATGATGCCAGCAGGAAGAGACCCCTCCATGGCGACACGGAGTCAGGACA  
CCATCACTTGCTACGAGCTGGAACAACCTTCTGCCGCTAGTATGTAATAAGGCGCCTTGTAATATCATATGAATGGACCA  
GCCATATGTTATTTCTTTAGAATAACCAGCTGAACCTCCCTTGCCCCGCTGGATATTATTGTACAATCCACTTGGACCTCT  
TTATAGTTCCCTACTAGAGATGAAGCACGTATAATTTTCCATGTGGGTTTGCCCTTGATTTGACAAACATGCAAGTTTCTA  
AAATGCATTTTCTCCAGTATTTACCAGAATTCATGCGTTTTTCTTATTTCTGTCAAACATGTAAGTTTACAAAATTCCTA  
TATTTTCTAAAAGAAGTCTCTGTTTTGCACTTGTATGTCTATCATATTTCTGTGTCTGTCCCTTCCATGCTTTTCAGAA  
TCCCGTGTACCAAAGAGGCCCTTTTGATTGGAACAGAGACCGGTTTACATTACAATTTCAATCAACAAGCTTAATGAT

TTCTAATTAGTCTGAAGATCATCATCCACTGACGGTGTGCCCCGTCTCCAGTCATTTCAGAGCTGCA

BPB-1469

TGCAGTAGATTAGTGCAATGTCACCTAGCATTTGTGCCCTGATCCACGGCCATCCATCCATTATTGGTGCCTAAAGTCTAT  
TCCTCTGTCGTGCATTGCATGCTTGATGGTCCTGATCAGAAGAAACACCATCCACTGATCTGTATAAGAAAAGTACGCGT  
GCCAACACAAACACAGAGAGTTGGACCTTGTCTATCTTATAAGTATGATGATTCACCTTGTGGTTCGTGGCAAACCTGATTG  
TTCTGTACCTTATTCCAATTCAGAGGTTATACTTTTTGTGCATGAAATACATATTTACCGTTTGATTTTAGAGGTTTTGT  
ATCACATCTCCTCTGGAGTTAATTTCTTCCTGACAAAATGAAGACACAGTTATACGCAGCCTAGTTACATACTCTGTGAA  
AAACAAATCCGGCACAGCCAAGGAAATAGCTGATATAAGTGATCTCCAGAATTGCCTGACATAACTCATCATGTGGAAAT  
TACTCCTTTTTCTGTTCCCTTTAGTCAGTCTTTTTTGATAGAAATGATGGTGTCTGATCCACGGCCATCCATTTATTGGT  
GCCTGATTTTTTGAGATCCTCCTTTTTTCCGGTGCCGTGCATTGCATGGTTGGCTGTCCCAATCACAAGAACTTCCAGCC  
ACAGCTTCTGTGTAGGAAAAATATGTACGCCAAGACCGAGACCAAGACTTGAAAAATACCGTAGACCATACACAATAATA  
TTGTGCTTACGAGTGAAGTCAGGATGAACACTCTCTCCATTCCATTGTTGTTCTCATCCTGTAGCTAGCTGCTCTCTTC  
CTCGTGGTACCAATATGGCTGCCGAGCTTGGGCATCTCGCCCGAGCAGCTGCA

BPB-8569

CAGTGAGTAGATTAGTGCAATGTCACCTAGCATTTGTGCCCTGATCCACGGCCATCCATCCATTATTGGTGCCTAAAGTC  
TATTCCTCTGTCGTGCATTGCATGCTTGATGGTCCTAATCAGAAGAAACACCATCCACTGATCTGTATAAGAAAAGTACG  
CGTGCCAACACAAACACAGAGAGTTGGACCTTGTCTATCTTATAAGTATGATGATTCACCTTGTGGTTCGTGGCAAACCTGA  
TTGTTCTGTACCTTATTCCAATTCAGAGGTTATACTTTTTGTGCATGAAATACATATTTACCGTTTGATTTTAGAGGTTTT  
TGTATCACATCTCCTCTGGAGTTAATTTCTTCCTGACAAAATGAAGACACAGTTATACGCAGCCTAGTTACATACTCTGT  
GAAAAACAAATCCGGCACAGCCAAGGAAATAGCTGATATAAGTGATCTCCAGAATTGCCTGACATAACTCATCATGTGGA  
AATTACTCCTTTTTCTGTTCCCTTTAGTCAGTCTTTTTTGATAGAAATGATGGTGTCTGATCCACGGCCATCCATTTATT  
GGTGCCCTGATTTTTTGAGATCCTCCTTTTTTCCGGTGCCGTGCATTGCATGGTTGGCTGTCCCAATCACAAGAACTTCCA  
GCCACAGCTTCTGTGTAGGAAAAATATGTACGCCAAGACCGAGACCAAGACTTGAAAAATACCGTAGACCATACACAATA  
ATATTGTGCTTACGAGTGAAGTCAGGATGAACACTCTCTCCATTCCATTGTTGTTCTCATCCTGTAGCTAGCTGCTCTC  
TTCTCTGTGGTACCAATATGGCTGCCGAGCTTGGGCATCTCGCCCGAGCAGCTGCA

BPB-2837

TGCAGATTTGTGACAGTTTATTCTTGGCATTTTTCTTCGGGCGACGTGCAAAGGCTTGTGTGTTGTCTCAATAAGAAGAG  
GAGGTTAATATTAATGGTGTCTCTTTTCGCCATCACCATAGTGGGATCCAGAGGGAGCAGAGCAGGGTTTGGAATCCGCC  
TGTGCCCTAGTGCCACTTCTCCGACGGCCACAGCGGCGATGGTGTGGCCACCGGAATCAGGTGCGCGCTGCGTCTCTTGA  
CCTGTTAATCAATTAGCTCATGAGCGAGAGATTCCTTTAATTAGTTGGTGAGAAATGGTGCTGCCGCCAAGCGTGGTAGC  
GGTGGTACTTGCCACTTGGGTTTTATTTCTGAAGGGTGTGGTATTAACCTGCTAGGTGCTACTGAAAATTGGCAATGTC  
TGGCCTCCAATCTTGCAATTAGTAAGTGCTAGTGCTGCACTGAATCCATCAAGGGCGAATCTGTCAGATATCCATCACAC  
TGGCGGCCGCTCGAGCATGCATCTAGAGGGCCCAATTCGCCCTATAGTGAGTTCGTATTACAATTCCTGGCCGTGCTTTT  
ACAACGTCN

BPB-7275

TGCAGATTTGTGACAGTTTATTCTTGGCATTTTTCTTCGGGCGACGTGCAAAGGCTTGTGTGTTGTCTCAATAAGAAGAG  
GAGGTTAATATTAATGGTGTCTCTTTTCGCCATCACCATAGTGGGATCCAGAGGGAGCAGAGCAGGGTTTGGAATCCGCC  
TGTGCCCTAGTGCCACTTCTCCGACGGCCACAGCGGCGATGGTGTGGCCACCGGAATCAGGTGCGCGCTGCGTCTCTTGA  
CCTGTTAATCAATTAGCTCATGAGCGAGAGATTCCTTTAATTAGTTGGTGAGAAATGGTGCTGCCGCCAAGCGTGGTAGC  
GGTGGTACTTGCCACTTGGGTTTTATTTCTGAAGGGTGTGGTATTAACCTGCTAGGTGCTACTGAAAATTGGCAATGTC  
TGGCCTCTAATCTTGCAATTAGTAAGTGCTAGTGCTGCA

BPB-9204

TGCAGTTTCGGCGGTGACCATCAGGGATTTCAGGGGCCTTCCCTTCATCTATCTTTCTGTCTCGCTATATTTGCTTTCTAGC  
TTCATGTGATTAGGCCCATGTTCTACCCTTCTTCTGTGATTGTTTATAGTCACCGGCAGATTTGTATTACTACGGTTGAT  
TTATGAAGCACTGTTTTAAGGTTTCATGTCTCCCAATGTCATCCAATCAAAGTCAAAAAGTCAGAAAATTGGACTAACAA  
TAGTGTTTTCCGTGAAAATACATAAAGTGAAGAAATTCATAGCCGACCTAACATCGTGAAAGGAATCTTTCCCTA  
ATAATAAAGTACACATCGCTTCTGTCTGCTGCTCGGTCAATTTTACATAAAAAACCTTGCGTTTTTTCCAAATCAACCC  
GTAGCCCGGATATAAGTGACAAGAACGAACCGCTTTTTGTAGTTTTTGCAAATAGGCCCTTCTGTTTTTCATGGAATCAACC  
CGCAATCCGTTTTGTCCGCATTTTATAGAAAAAACCTTAACCTTTTACGATAAATAACCTGCA

BPB-10678

TGCAGTTCTCTGGGCTCCACCTTCTCCAAAAATGTAAGACTTCTCACCACACTTTGGGCACTTGAAGCAACTCATGTTCT

CTACTAAGCCTAGAATCTGCCAAAATATACAGCTGAGTAATGCTGGGAAGAGTGGAAGACTTTGTGAAATATTGGATAGT  
GGCACATGCTAGAAATTTAAGCTAATTATTTTTCACCTCGTGAAATGAATATGCCCTACTGCGATTGAATTTCTCATGAATAG  
ATATGTGACAGTAATAAACTAACAAATAGTAACTGATGCTGGTTGGCAATAACATTAACAAATAAACAGGGAAATGAACGG  
TGTGATAGGAATTAGAATTTCTATCTGAATTAATGTTTAATATCTAATACACGCCAACGGCTAGAACTAAGAAAGAAGTA  
CAGATATCACAAAACAGAAGTTACATAGAACATACAGGAACCTTGGACTTTACGAAACATATTTGCTCCTCTTCTAGCATC  
AATTAGAGCAATATCTTGAGGAGTAGAAACAATTAAAGCACCTGCA

BPB-6145

AATTCGCCCTTGATGGATCCATGCAGGTGCTTTAATTGTTTTCTACTCCTCAAGATATTGCTCTAATTGATGCTAGAAGAG  
GAGCAAACATGTTTTCGTAAAGTCCAAGTTCCTGTATGTTCTATGTAACCTTCTGTTTTGTGATATCTGTACTTCTTTCTTA  
GTTTTCTAGCCGTTTGTGTGATTAGATATTAAACATTAATTCAGATAGAATTCTAATTCCTATCACACCGTTTCATTTCCC  
TGTTTTATCTGTTAATGTTATTGCCAACCCAGCATCAGTTACTATTGTTAGTCTATTACTGTACATATCTATTTCATGAGAA  
TTCAATCGCAGTAGGCATATTCATTTTCATGAGTGAAAAATAATTAGCTTAAATTTCTAGCATGTGCCACTATCCAATATT  
TCACAAAGTCTTCCACTCTTCCCAGCATTACTCAGCTGTATATTTTGGCAGATTCTAGGCTTAGTAGAGAACATGAGTTG  
CTTCAAGTGCCCAAAGTGTGGTGAGAAGTCTTACATTTTTGGAGAAGGTGGAGCCAGAGAACTGCCTGGATCCNTCAA  
GGGCGAATTCTGCAGATATCCNTCNNNNNGGCGGNGCTCGAGCATGCATCTAGAGGGCCCAATTTCGCCCTATAGTGAGT  
CGTATTACA

BPB-1999

TGCAGGCAGCAGTTAGCGTGCATTTTGTAACTGACGCGTGCAGCGTTCTTAAATGTACCGGCCAGTGTAAGCGCCGGGT  
CACAAAAATTTTCTTCGAAATTCATATACTTTTAAATTTTTTGATAAAATTTTGCCAAATTTTCGACGAACATGTTTTAA  
ATTAATGGAAGTTTCTCCGAAAATCGGTACACCTTTAAATTCATGAACTTTCTCGAATATTGACGAGCTATTTTTAAAA  
TGATGAACATTTTCAGAAAAATGGAAGATCTTTTTTAAAAATGATTAAACTTTTTTAAAAATGTAAAAACAATTCAGTTCAA  
TGAACTTTTTTTTGAAAAATACATGAACATTTTTTGAATTTCTATGAACTTTTTTCAAATTAAATGACCTTTTTTAAAAATTT  
AATAAACTTTTTTAAAAATGATGAACCTTTTTTCAAGATATGAACTTTTTTTTGAAATGAATGAACCTCGTTTTTAAATCT  
GGAAACCCTTATTTTATTTTCATGTTTTTATTTTTCATAAAAAATAGAAAATGTAGACGGTTTTTTTTCTCTACTGTATCAACAGA  
GAACAAAAAAGAAAAAAACTGAGCTGCTCACCAGCGTGCTAGTAGGCCGGCCCAAGCCAGCTACTCTAATGGCGCCGG  
ATTGTTAACGGGTGCTGCCTGNATCCATCAAGGGCGAATTCAGCACACTGGCGGCCCGTTACTAGTGGATCCGAGCTC  
GGTA

-----  
**CHR. 5H**

BPB-0170

TGCAGATAGAGGAAAGAAGTAATAGTTCCAGCAATTCTTGAATCTACATTTAACTTCATAAGAAAGAAACCCCGAAAATA  
GTGTATTTCAAATATCTCTCTGCGAAAGGCAAAAAAGGAAATGTATGTACACCTGATTTCGATTTTACTAGGCTTTTAAACT  
TCCGTTCTATGTGGATAGTGGTTAATTTAAGCATTTAATGTCTCAGCCCAGTTGTATTACTTTTTGAGACAGAAACAAGGA  
TGGCCTTCAGGATAAACTACTTCAGATGAGTAGTATACCTATGATGATGGACCTCAGTGTAAAGGGCGGGTGTACCCCTAC  
TTTCTAACAAAGAAGTATAGCTTTGATAGGCAACACACAAGATTTACAGTACATCAAGATGGATGTAATTTTGGACCTTC  
CCATATCCATTGAGACAAATTTAACGGAATTATAAAGAAATCTCAGTCCACCCCTCCAATCACAGCAACACTTAGGTTG  
ATATAGTATTACCCGTTTGTGTTGGATTTGAAATTACACTTAGGTTACCTTTTGAAGAACTCTTTGATTTTCGATGTATGC  
TGCACTGTGACTTTGGCCAAGCATATTATCTCAAAGAACTCTTTGGTTTACGGTGTATATATGCAACATTGTTAATTTCA  
GGACGGCAAAAACAGTATGAAGGAGAGACGCAGCAACAGTGAAGGAGAGACGGCAAAAATGTTAAACATGCATACAAA  
AACATATTGCCGTATACGAAAAATATAGACATCAAAAAATATTTCTAAAAAAACCTAATTGTGTATTCAAAAAAATGAA  
AATGTATAAAATAATACTGGGGAAAACGATACAAACAACACACAGAACAATAAACAATAAATAAAGGATCTAAAC  
CAAAGAAAAAAGAAAACCCATACAAAACGATATAAAACAACACTTAGAACACAAAAAATTAATTCATAAAGTCATAGAA  
AAGTGGTGAAAAAGAAAATTAATGAAGAAGACGGTGAAAGTGAAGAAAAATGAAGGAAATTAAGAAGAAAAAGAAAAA  
CAGAGAAGCCAATAAAGAAAAAAGAAAAAAGTGAACCTGCGGGCTCTACAGGCAAGTGGAGCTATCATCTCGCT  
ATGAGCGAGATATAGCTCCACGATGGTACCGGGTGGCGAAGCGTGCACAAACCTAACCAAGTGGGCCTGCA

BPB-7676

BPB-2591

TGCAGCTGCTAACTAAGCAATATACTATATGCATACATATACAGAGAAGAAAATTGCTTTGACAGAACACCGACAAGCAC  
ATGGGAACAGATATACAAACAGGAAATGGTAAAAAGTACACTGGAATTTCTTTTGAATTTTATTTGAATACATAAGTTTAT  
TTGAATTTTTTCTGTACTCCTTAAAAATCAGAATCCGGATTCTTAGATCATGATTTCATCTCATCAAGATATTACAATTTGG  
ACAGGACAATGGAAGAACTTGGAGCCAACGTTTTTTTTCTGCGATTGTCAGAGCTATCACTATATTTATTTTGGAGGCAAA  
GATGTCCTGTACTAAGGAGAGCAAGCTTGAATACATAAGAACACCTTCAAGCTTTATATTGAATCCCTGATTTGTTGCA  
ACTACCAAATTGCTAGTTCTGAATTTCCAATTAGATAGCTGCATAGTCCAGCTAGCTACACTAGAAGCTAGATCAAGCTAA

TTTCGTGGCACACATGGCTGATGCAACCAATTGGGACTAATAAACAGAAGAGTAATCAAACCACTCTCCTAACCAATTGA  
AATACCAATGGTTCTTTGCTTCAGGCAACCACCAAATAGAGCACTTCATGTACAGCTTGTCTGGCAGATAACAGGGAGAG  
CAGTAGGAGATATAGAGGACGGAGGGAGATGGATATTGGGAAGTGGGATTAATTTGATGCCCCAACTTTTGTTTAGTTTA  
TTTTGGGACTTATTAGCGGGAAGTGAAGGAGAAAGGTTTGGTTGCTCTTTTGATCAGTGAGTCAGAACAAGAACGAGATG  
CAACATTTAGAAATTGACCATTAGTATTTAATGCATCTTTATGCTTTTCTTCTTCTATGCATGCGCTCCTGCA

BPB-1084

BPB-2460

TGCAGAGTGAACAAACAAAAACGGCCCACTACAGCAACAACAAATAACGGGCTGCAAACAAAACAGAGAAGTGGTTCAA  
ACCCATGAATCGCGGCGCAAATGATCGAACGGTTGAGATGGTGACTGAGACCAAACCTGAATCTCAGCTAGCTGAGTTT  
CAGCAATCCCGAATGATATTACCCGGGACTGATGCTGATCCAACGGCCAGAAACACATGGCATATAAGTCTTCAAAAATG  
TATTGAATATATCCGTTCAAACATTTGACTCACATGTAGTGCATTGTACACTGCCCCAAGCATACATGAGGTGTCCAAGT  
TTGGATTCTAGAACCATATTGCATGCTGCCAAATACGACCGTGGAAAAACGCATGCAACCTAACTATATTGTGGCTATAA  
ATACCTCCACCGCGAGAGCTGCA

BPB-8072

TGCAGAGTGAACAAACAAAAACGGCCCACTACAGCAACAACAAATAACGGGCTGCAAACAAAACAGAGAAGTGGTTCAA  
ACCCATGAATCGCGGCGCAAATGATCGAACGGTTGAGATGGTGACTGAGACCAAACCTGAATCTCAGCTAGCTGAGTTT  
CAGCAATCCCGAATGATATTACCCGGGACTGATGCTGATCCAACGGCCAGAAACACATGGCATATAAGTCTTCAAAAATG  
TATTGAATATATCCGTTCAAACATTTGACTCACATGTAGTGCATTGTACACTGCCCCAAGCATACATGAGGTGTCCAAGT  
TTGGATTCTAGAACCATATTGCATGCTGCCAAATACGACCGTGGAAAAACGCATGCAACCTAACTATATTGTGGCTATAA  
ATACCTCCACCGCGAGAGCTGCA

BPB-8866

BPB-33276

TGCAGGAGCGCATGCATAGAAGAAGAAAAGCATAAAGATGCATTAAAGACTAATGGTCAATTTCTAAATGTTGCATCTCG  
TTCTTGTCTGACTCACTGATCAAAGAGCAACCAAACCTTTCTCCTTCACTCCCCGCTAGTAAGTCCCCAAATAAACTA  
AACAAAAGTTTGGGCATCAAATTAATCCCACTTCCCAATATCCATCTCCCTCCGTCTTCTATATCTCCTACTGCTCTCCC  
TGTTATCTGACAGACAAGCTGTACATGAAGTGCTCTATTTGGTGGTTGCCTGAAGCAAAGAACCATTGGTATTTCAATTG  
GATAGGAGAGTGGTTTGATTACTCTTCTGTTTATTAGTCCCAATTGGTTGCATCCGCCATGTGTGCCACGAAATTAGCTT  
GATCTAGCTTCTAGTGTAGCTAGCTGGACTATGCAGCTATCTAATTGGAATTGAGAACAGCAATTTGGTAGTTGCAACA  
AATCAGGGATTGAGTATAAAGCTTGAAGGTGTTCTTATGTATTCAAGCTTGCCTCTCCTTAGTACAGGGACATCTTTGCCCT  
CCAAAATAATATAGTGATAGCTCTGCAAATCGCAGAAAAAAAACGTTGGCTCCAAGTTCTTCCATTGTCTGTCCAAATT  
GTAATATCTTGTATGAGATGAATCATGATCTAAGAATCCGGATTCTGATTTGAAGGAGTACAGAAAAAAATCAAATAAACT  
TATGTATTCAAATAAAATTCAAAGAAATTCAGTGTAATTTTTTACCATTTCCTGTTGTATATCTGTTCCCATGTGTTTG  
CCGGTGTCTGTCAAAGCAATTTTCTTCTCTGTATATGTATGCATATAGTATATAGCTTAGTTAGCAGCTGCA

BPB-47406

BPB-1807

TGCAGCGTCATGATATTCCTTTCTGAAGCTCAAGGTTGTTGTGATATAATTATTCAGCATGCAAGGAGTTAAATGAAGTT  
AGACAATGTCAACCATGTGTTTTGGCTCTCCTTTACAACAATGTGTATCTTATTTTTTCAGAAAAGGAATAGCTTTACTAC  
ACTATAGACTCTGCATCCCAAGCACATAAGTGATACATCTTTGACTTAGTGGAATGTAAATACGCTCCTTTGTTTAGTGA  
GATATCAATAAGTTAATTTTCGAACATATGGATCCATTTGGAACATATGCAGGAAGGTGAACACTATTTAGGACGTTTTTC  
ATGGGTATACCTTGAACTGTCATTTCAACACCCCTTAGCACATTTTTTAAAGAGGTTGTGCCCTGTATATGTCTAGACCAAAGG  
AATACAGTAAAGAGCATATACGGATAATATGAAAGCTTGTCTTTAGATACGGTGTGAGTTGGTTTTGAGTTCCGAATATTG  
GAAGTGTAGTTTCAATTTATTTTACTTTGGTGGTTTTAGTTTTTGGAACTAATGAAGAAAGGCGATGCTACTTACAATTGATT  
TCATGGGCTTACTCAAACCTGTATTGAACAACCTTATCACGGGACCGGAGCAGAGCAACATTGACATCATCAGTGCAAG  
TCTCCGCCCTTGGCTACTCGCTTATCGCCACCCCTTCTACCAGCACGTCTCTGGAGCAATACTAGCTCCCTTACCTTCC  
CAGCCCTGCA

BPB-0091

TGCAGCGTCATGATATTCCTTTCTGAAGCTCAAGGTTGTTGTGATATAATTATTCAGCATGCAAGGAGTTAAATGAAGTT  
AGATAATGTCAACCATGTGTTTTGGCTCTCCTTTACAACAATGTGTNTCTTATTTTTTCAGAAAAGGAATATCTTTACTAC  
ACTATAGACTCTGCATCCCAAGCACATAAGTGATACATCTTTGACTTAATGGAATGTAAATACGCTCCTTTGTTTAGTGA



GATATCAATAAGTTAATTTTCGAACTATGGATCCATTTGGAAC TAATGCAGGAAGGTGAACACTATTTAGGACGTTTTTC  
ATGGGTATAC TTGAACTGTCA TTCAACACCC TTAGCACATTTTTAAAGAGGT TGTGCC TGTATATGTCTAGACCAAAGG  
AATACAGTAAAGAGCATATACGGATAATATGAAAGCTTGTCTTAGATACGGTGTGAGTTGGTTTGAGTTCGGAATATTG  
GAAGTGTAGTTTCA TTTATTTTACTTTTGGTGGTTTTAGTTTTGGAAC TAATGAAGAAAGGCGATGCTACTTACAATTGATT  
TCATGGGCTTACTCAAAACCTGTATTGAACAACCTTATCACGGGACCGGAGCAGAGCAACATTGACATCATCAGTGAAG  
TCTCCGCCCCCTTGGCTACTCGCTTATCGCCACCCCTTCTACCAGCACGTCTCTGGAGCAATACTAGCTCCCTTACCTTCC  
CAGCCCTGCA

BPB-0351

BPB-8592

BPB-3436

CATGCGTTAGCTAAGGTAGGAGTGTCTACTGATTTTATGTAAGGTTTGGTTGCATGCGGATACGCAGTCTACGAAGGGCGA  
ATTCTGCAGATATCCATCACACTGGCGGCAGCTCGAGCATGCATCTAGAGGGCCCAATTTCGCCCTATAGTGAGTCGTATT  
ACAATTCACTGGCCGTCGTTTTACAACGTCGTGNNGGGAAAANNNGGNCAGTGAATTGTAATACGACTCACTATAGGGC  
GAATTGGGCCCTCTAGATGCATGCTCGAGCGGCCGCGAGTGTGATGGATATCTGCAGAATTTCGCCCTTCGTAGACTGCGT  
ATCCGCATGCAACCAAACCTTACATAAATCAGTAGACACTCCTACCTTAGCTAACGCATG

BPB-1820

TGCAGGACCTCCTCGAGCCTCCTGATGGCCCTGATCAAGCTGCCTTTGAGCACTTGGGTCATCTCCTATTGAGAGATACC  
TAACAATCCCCCTCCGCGAAGAGGCAAAGATCAGCAAGCTTCAAACCCAAGAATGCAACCACACGTTAGTTGCCTTCAGTAC  
ATGAACAAAGCAAGTGAAAGCAGATTCTGAAGCAACTGAAGGGTGACACCTTCAGAATTTAGGGAAGGAGGTACTACCGCT  
ATGATCAACCACTAGTTCTTCCACACTTACTCTATGGATCAGGAATCACAACCGTACATAAAAAATCCCCCTGTTATGGA  
ATTTGACTGCTCTTGATTTATCTATTGCTTAACCATATAGTAGAACTCTGCA

BPB-7320

BPB-3892

TGCAGCATCATCAAACCTAGGGAGGATCCCGACGGCGGGGTGAGCATAACGTAGTACTTGCTATTTT CAGCTCAACACAGA  
GGTTACCACCTGCGGCAGACTCAACGCTGTATATTTTCGGGATCGGACTGAAATGCACACAAGACTTGCGAGAAAACATC  
AGACCCTACAGCGCCGGCATGGAGAGAATACTGTATAGCTAGTTACGAGCTTCTGATGCTTGAAGCTGGATACATAGAAC  
TACGCACATGATAGCTCTAGGTACGATTACATACGGTCATATCTTGATTACCCTAGAGACATCGTGCATTTACGCTGGGCC  
GGTGACAGTTTTTCATCAAGGTTTAAATCGCGGACACTGCA

BPB-5075

BPB-0949

TGCAGAGTTTCACTATCCAGCAAACCTCAGTTGGAGACCAGTCAATACTATACAATCAAATTAAGAAGGCTGAACTTCAGA  
GGTCGCTAGACCCCTCCGCCGTTTGACAAGCGGGGGTTCTCCGACTCGACCTCGGAACGTCAGTGGACCTGTGGCAGCTTTT  
GGTTACAGTGCAACACAACCTAGCACTAACACACGCACACAACATAAGTCATAGTTTACATGCTATAATAATGAGCAATAT  
TAGTTACAGTTAAGTTTTACTGCACACTCAGAATAACAAGTTCTGAACTCGGAGCTTCAGATTAGCCATCAGTTATAGTT  
GGTTTGACTTTTGAGCTCACACTTGGAAATCACAATTTATAATTTGGCATTTT CAGATTAGTCATCTGAACTAATGCACAAA  
ACAGCGGACAAATTTTACAGGCCATAACTATGAGCAACATTAGTTGCAGTGAGGTTTTACTTTCACAGTTAGAATCACAAG  
TTTTAAACTTGGCACTTCAGATTAGGCATCTGATATACCAGCATGCGTGCACAACAGACTAACAATTTTACTAGAAAACGG  
TGTCAATTCCTAAGAAAGTACTCTACGAAACATTGTCAGCTAGACAAGTAGTAGTATCACTTTTGATCACAGTTTCACTA  
ACTCTCTCCGTACCTAAATATAAGTCTGTTTAGAGATTTCATTAGATAAATACATATAGAGTAAAATGAGTAAACATACA  
ATCTAAAATATGTATACATCCATCCGTATGTAGTCACCTAGTGAAACCTCTAGAAAAACTTATATTTAGAAACAGAGGAA  
GTACTGTATTAGGGGGAGGCAGCACAAATAGTTAACATCGCGGGCCTGCA

BPB-0786

BPB-6824

NTGCTGGAATTCGCCCTTGATGGANCCAGTGCAGGTGATTCAATCCATCGCTAACGCTTTAGCAACTACTCCCTACGTCC  
AAAAATAAGTATCTCAAACCTTAATATGATTTATATTTAACATTTAATACAAAGTTAAGATACTTATTTTTCAGACGAAGGAAG  
TATAATATCCGCTCATACGTGATTTTCTTTTACAAGAAATTTGAAACATCACTGATTTTGA AAAAGTTT CATAAACACGCAAA  
AAAGTTCATGAACCCATTTAGAAAACATTTGATAAAAAATAGTTT CAGAAAAATTTGAAAAAGATCATCAATTTTGTAAAAAA  
GGTCATCCATTTTGA AAAATAGATAACAAATTTCAAGAAAAATTCATCATTTTGA AAAACAAATCATAAATTTTGTAAAAA  
GTTTCATCACTTTTAAAAATAGTCATCGAATTTGAAAAAAATCATCAAAATTTTGGAGAAGATCTCCGAATTTGTTTGA AAAA

GTTCTGCAATTTGGAAGAAAGTCCATGAACAATGGAAAAGAAGATTCATTTGATTTTGAAAAAATACGCGAATTCAA  
 AAACAAATCCGTGCATTTAGAAAGAAAACAAAAAAGGAAGAGAAGAAAAATCGAATAAAAAATGTCACCGACCAAGTGCAC  
 TGGGAAAAACAAACGTGAATAGTAGAAAAGAAATTAAGGAAAAACAAGATCATTTGTTGCAAAACCGTTTGACATACACAGT  
 GGTGCAAGTTCAAACATGGCGGCTGCA

BPB-8924

TGCAGACTTCAGGAATCCAACACCTCCAAAACAACAGAGCAAGAAGCAAGAAAAATAGGAACGGTAACACGAATCAGCGAT  
 TGTGAGCCCGTCATCAAATTAATTACATGGGACTTCTTTACGGTACCAATGGAAAATCAAGCATTTTACTCTGTTTTGAT  
 CTATCTGCTATTCTATTCTGAGAACAGCAAAGCATTTGTGACCTTCAAAATTCTTAAAAGGTAGCTATCGAAGCCCTTTC  
 TCATAGTCAAGCAAAGAACAAAAACCATTTATCAAGTTTCACATCACGCCATGCAACTAAGAACAAAATCTGTATCACCAT  
 TCGCCACCACACTATGTCACCTACCTCATCAGCAAACGCCCTACCTCATCAACAAACGCCACGTTCTCTCCTAAGTAAAAG  
 AAGTTACTTCTTCAGATCCGAGGGCTCAGCCTGTATTTTCATTATCAAGAACCACACCGTATACAAAGCTCATACGGACA  
 AGGAAACACATAAAGCACAGAAGTAATCCATACAGACTCCTAACAGAATCTGATGTAAAGATCAACAAAGGACGGGAGC  
 AATATGTAGTCGGAACCTGCA

BPB-5207

TGCAGCAAATGCATGCATGCTCCTCGCTTCCGTAGACGTCAGCGTCTCCGCGTTGTGTGGCCATAACTTTACCGCTGTGA  
 TTCTTGCCTGATGAGGGTTGCCAATGCTGCATAGTTTATCTGCTGGACTGTTTCACGCTGTTGTCCCTTCTTCACTGTT  
 GTGGTCACGCCATCATCAACGCAAATGTTCCGGTAGAGTCTATGTGCTGATAACGTGTTAAATGTAAAAAGTAAAGATCGA  
 GGAGAGGTGAATGAAAAATGATTCATTAGTCTTTATTTGATGATAGCAATGGGGTATTTATACCCGGGCGGAAGTACACAT  
 GTTGCTTGGGAGTCAAGTAACGTGAAGTTACTTAAGGGCCAAGTTATTACATAGTTTCTTGGAGTCAAGGAAGTGCAT  
 GATTGCTTGGAGACTAAGTAACCTATCTAAGAATTAACCTAATCCTAATCAGCTTAATTAATAAGCAACTAATCTATTCT  
 TAACAGTTTTTAAAGTTGAGGCTTGTATATTAGACAATTTTGTAGTTTCAGGGTTGTGTTTTAGACTTCGGTGGTAGTTCA  
 AAGTTGGAATATTCTCTTTTACTCCATCCGTAAACCTTTTATAAGACGTTCTAGATCACTAATTTCGTTAGTCAGTTTCTT  
 GGCCCTTGCCACTTTTTTGGATCATTCTCTGCA

BPB-4418

BPB-8637

BPB-8803

TGCAGCAACGAGAACAATCCATCCATGAGATTCTTGCAAACACATGTACCTAAAACAGTTCTGGCCTCTAATAATATAAA  
 TATGGTCTTTAGATTGATGTGAGTTGGTTTGTCCCTCCGATAGTAGTAACATCAAGCACGGCGGTCAATATATTTGCTGAA  
 ATCAGACAAGTAATCTGGTTCGTTCTACCCATTTGCTTCGAATCTATTCCCTCTGTTCCCTAAATATAAGTTTAAAAA  
 TTACACTACAGACTACATATAAATGTATATAGAGTTATAGACATACTTTAAAGTATAGATTTCATTTCATATTGCTCCATAG  
 GTAGTCCGTAGTGGAATCTCTAGAAAGACTTATATTAGGAACGGAGTGAGTAGTATGGGCCCCCTTACACAACTGCAAGA  
 AAGCTGTGAGCAAGTACCCTTTCAAAGCCCATCCCAACCAGCTTAAGCTCTTCATCAAATGTACTGTCTAGTCTGCA

BPB-5271

TGCAGGATTTCAATTTTTGATAGATTTTCGGCCTTTTTCGTCCTAATTTCTGTTTGTTTTTCGTTCAAAAATTCAAATTTT  
 AGGTTAGTCTTTTCGTCTGAATTTTTCCAAAAAATCCGAAATTTCTGAATTTTTCCCATTTTGTGTTGGAGGCGATAAA  
 ATTTGCAAAACGAAATCCAAATTGCTGTGAGAGGCACCATAGATATGTGTGGCGGGCGATATACCTTACCTGCCAATGCT  
 AACTTTTGAAAAATTTGTGGCGTGCAAGGATTTGGCCAGCAAACTGCTGCTTGAAAAATTAGTAGCGACCAAGATGTGCG  
 CTGCCACTGCA

BPB-6805

TGCAGAGATGGAAAAACAAAGAAGGCTGCTGAGAAGAGAAGGATTCAGAGGAAAAGAAAATGATTACAAATAAAAAAT  
 ACCAGCAGGAGGAGGCAGCTTTTCTAATACATCAAGTAGAGGAGTTTGAGAGGCACGAGAGTTGGAGAAAATTCAGGAG  
 GATGAGGAGGCTGCAAGGCAAAATGCTTGGGAGCAACAGAACAATCAACAAGACACGACAGGGAATGAAGAATGGGAGCT  
 GAGAAAGAGGAGAGCTGAAGAAACAAACAAGAAAGCAATGGATGACAATATGGCAGGTCAAGCAAGGAAGCAAGCTGCGT  
 TGGAGGAACAAATAAAACAAAGAGCTGCAGCAACTAGTTCAAGGGCCGAGGAGGCAAGATTTAATCCATGCCCTATTCAA  
 GGAAACAATACAAAGAAAAATCTGCACCTACCAATCAGAACATGACATGTTTTAAGAAACCTAGAAAGGTTAACATGTT  
 CGATGAATTTAGGTAAAGGGACGTGAAGTTTGGAAACAATCCTCATCTCTTTTTTGTGTTTCTGCTTATGATCAGGCGCAA  
 AACTTGTAATGGCAATATTTTTTTTAGGATCATTTGCGTTGATCATGAAGTGGAAGAGCTGCTTTTTATTAGGAAACAACT  
 ATTACAGACTTTGTGTTATTTGTACTGTGCAACTTAATTGACCAGATTTGTTCAAGTGCAAATATAATGCTTATGTGTGCT  
 TAATTTGTGCAAATCTGATGGCCGGCAACATGCGTGGCAGCTACATGAGTGGCAGAGCTGATGGAGGGATTTGGGTGCTG  
 CA

BPB-2988

TGCAGGATGAGCAATACCAGTATTACAAGAAGCTTGGATGATGAAAAGAAGTATCTCTTGGTGCTTATGTTGGGTGATTTCC  
CAAGATGCCATGGTAACCCATATTACCTATCTGTGTTTTTTGAAGATGAATGATGTTTGTACGAGTATCTAGTACTTTAGT  
TCCGTTAATTGCAGTCAATTTCTTGACGGGCAGACTATTACAGTTAGTGTACGAAAAATCCACATGGTTTTGGGGGCAAT  
TACAAGTAAGGTCCAGAGCCATTTTCCAGTCTAACATGGTCCCTCTCATAATCTCATTAAGACCATGTTAAATTTGCTCG  
TTTCTTAAAGACTAGGAATGCTAAGAGTCAGATATCAGAAAGGCAAAGTCGAGATATACCTTGATTATAACTGTTGTCAT  
TTGGTTGCGCATAAACTATCCGTAGAAGAAGTCTTATATCTGTCTGCA

BPB-8809

BPB-9733

NGCCAGTGTGCTGGAATTCGCCCTTGATGGATNCAGTGCAGCTTGATTTTTGTCCCTCGTGCTTGCCATAGCATGTCTGAC  
GAGGTTGGTGTGTTCTGTGCCAGCTGCAAAGATGGGGAGGATACCGTCCCTGAAGAACTTCAATGCGTTCCCGCACGCC  
GAAGACCACCTGCTGAAGAAGACTTACTCGGGTGCTATAGGTACATAGATACATAATATGCTGCCCTCGTGAAGTGTTC  
TGCTAATGGATGCTTATATCTTGAGATTTGTGTCTAATACGCGCCATCGTTGGTATGTTGGCAGTGACGATTCCTCGGGC  
TAATTGTTATGGTAACACTTTTCGCGCATGAGCTCACGTTTTACCTTACAACCTATACGATGCATCAGGTACGTTTTGTT  
CTTGTTACCTTTTCATGTAGTTTGGCTAGCATATGTAGCTTATTGTGATGTCTATGTTGTTCTGTCCATTCTTACCCAA  
CTTTTATGACTCTAGTTTGTGTTGGGAATATGCCTGTAGATGATTCAAATTTCTCCTGTTTAAAGTTTATTCACTATGACT  
TACGAAACCAATCTGGCCAAGGAATCTGCATGATGACAAAGGAACATGAAAGAGAGCAGTTAGTTACATTTATATAAAA  
TTGTGTGCCCTTTGATAGTCTCATTTGTTGTTAATATCTGCTAGTTGTTGTTTTCATATTAGTGAAAACCAACTTGGACGT  
TGTGGTTCTATTTCCCTTGTTTCGGAATGCCATCTCAAGTTTTTCTTCAATATCTGCA

BPB-5529

TGCAGATTTCGATCGGTCTCGACGAAGTCCACAAAAATAATCCATGGACATGCATACATTTCGTAAAAGAGGAAAACATGCAT  
CAGGAGATTGTTCAATTTGTCTTTGTTTTCTTGCAATCAATCTAAGATCTAATAACTACTTGTATTTTGGGAATCGCAAA  
CAAGAAGTACAGGAGGAAGAAGTGTGTATTTCCCTTATCAAGAACAGATAAAAAATCAAGAAGAATGAATCAGGAAGCAT  
AAATCGAATAAGAAAAAAGGGGAGTCAACTCACGAAGTAGTAGCATACCTCACACACGAAGTACACAGATCAAAACTCTT  
GAACCTTAATTGCTACAACATGAGTTGATCCTAATCCAATTTTTCTTGTCTCACACACGAATACTAACCTGCTGGACAA  
GGCCAACGGCGACGTAACGCTGTCCAGCGCAACCATGGCCATCGGCCCTTCTCGGAGGCGGCCGGCGGCCATAGAAACCTC  
CAGGCACTGCA

BPB-5379

TGCAGTGTCTGGAGGTTTCTATGGCCGCCGGCCGCCCTCCGCGAAGGCCGATGGCCATGGTTGCGCTGGACAGCGTTACGT  
CGCCGTTGGCCTTGTCAGCAGGTTAGTATTTCGTGTGTGAGAACAAGAAAAATTTGGATTAGGATCAACTCATGATGTAGC  
AATTAAGGTTCAAGAGTTTTGATCTGTGTACTTCGTGTGTGAAGTACGGAATCTGATTTGATGCTACTAGTTTCGTGACTT  
GACTCCCCTTTTTCTTATTTCGATTTATGCTTCCCTGATTCATGTTCTTCTTGGTTTTTCTCTGTTCTTCATAAGGAAATA  
CACAGTTCTTCCCTCTATACCTTCTTGTTTTGGCATTCCTCAAAATACAAGTAGTTATTAGATCTTAGATTGATTGCAAGAA  
AACAAAGACAAATGAACAATCTCCTGCTACAGTTTTCTCTTTTTACGAATGTATGCATGTCCATGGATTATTTCTGTGG  
ACTTCGTCGAGACCATCGAATCTGCA

BPB-8822

TGCAGAAAAGGTAGCACCAGAAAACGTGCTACACTGGTGGATTCTACTAATCACCATGGCAATATATTGAATGCAACAAA  
TAAACTTAATTTGGACACGGTTCAGTTGTCTCAGAAACCCTATCCCATTACCATGGTCAGAATGGTACTGTGTTTATA  
TTTTCAGGAGGCACGGCCAAGTTTGCCATTTCGGTACAGGAGTAAGAAAAAGAAAAAAGAAACAGGCGTGTACTTGATTGTG  
ACCAAACATAAATTACAGAAATGGATCCATGGAGATATCCGGACTTTTAAAGTGCAGGAATGGGCAACTGCCACCAGCCCA  
ACATAAGTTGACTCTCACACAGCATATAGACTTGGTACTTGTACAGTTAACACAGAGACTAGGTATGACTTTAACCGTTAAA  
GGATAATGGCAACCCCAACCATCCATTAGTATTACCATGGATTGCGGTTTACAGTTCTCCACTGAATAGTGACATAGCACA  
AAGTAGATGCAACATCAAAGTACAAGAAGATTTACATACCTTCCCTTCGGTTTTCGGATTACGTGTTGAAGCATGCTCTACA  
GCGGGTGATTTTCTCTCAACCATTTCTGCTGTCCACCAATAGCTGCA

BPB-1821

BPB-4012

TGCAGGCGGGTCCAAGGAACGCTGGAGCAAACCTGAAAAAAAACAAACAGAATGATATATACAGATGCCTCGTATGTTCCA  
TTTCCGAACCGTTCGATTTCTACGACGCCACAAAATTGTACATATAATACCAATCATAAATTGTAAAACACTGTTTACAGG  
TACGCGATTATGCTCGCTGCCATATATGTGGAACACGATAATGCCGAAGAGCAGGGTGAAGCTATTGTGGGGAAGAACCC  
ACAATAGAATGATAGGAACCTGGAAATAATAGAATGATAGCACTAGCAGATGCCTCGTATGTTCCATTTCCAAAACGTTAA  
TTTCTATGACGCCACAAAACCTGAACATATAATACCAATCATAAATTGTAAAACCAACCGTTACAGGTACACGATTATGCTC

CATGTCGTACATGTGGAACACGATAATGCCCAAGAGCAGGGTGAAGCTATTGTGGGGAAGAACCCGCAATTTCTATTGGC  
TTACATGAGCAGTCAGATCGGCATCATGCCATCTGAACTTGTCTCTTTTAGGCAAAAAATACACTGTCATGGTTACTC  
CAAGCAGCAAATCGCTTGGCGGCAATCACAAATTTATTTCCCAAATGAAAAAGGCTAAGCCTTTACGGGAGATGTCATCATC  
AGTCTTTTGGAGCTCAGTACTTCTTCGGTGGCTAAAGAAGATGCCAGTGTCTTTCTCAAGAACTTTGTCAGCTGGCATA  
CCATAGAGTAGCCTTAACGCATCGCCCCACCTGCCAGCTCGAGCTCAAAATAAATAATATTCCAAATGTACTAGTACTAG  
CTATGAACCTTTTAGTTTTTCATTGTTGCCATTTTCATGCATTCAAGCAGAGGGTCAAAAAGATTTGAAGAAGAAAGAAAG  
CAAAACAACCAAGGGCTTCTCGCATGGGTGAATAAAGATGCAGTCTGCTAAGAATGACAGACAGTATTTCTTAGTCTAGA  
CCGTGGACGTTGTGGGTCAAGGTCAATGTAGTTTAGATCATGTAGTCCATGTCATGATTCTGTGCGCTGTATCTAAAGAC  
ATGGTCACTGTTACTCCTTATTAGAATGACTACTGAATTATAATCGACACGTCAGTGTATATTGTGCAAACTCTTTCCC  
ATTTTTTAATGTTTTTCGCTTCTGCA

BPB-3316

BPB-5182

BPB-2425

TGCAGAAAAGGTAGCACCAGAAAACGTGCTACACTGGTGGATTCTACTAATCACCATGGCAATATATTGAATGCAACAAA  
TAAACTTAAATTTGGACACGGTTCAGTTGTCTCAGAAACCACTATCCCATTACCATGGTCAGAAATGGTACTGTGTTTATA  
TTTCAGGAGGCACGGCCAAGTTTGCCATTCGGTACAGGAGTAAGAAAAAGAAAAAGAAACAGGCGTGTACTTGATTGTG  
ACCAAACATAAAATTACAGAAATGGATCCATGGAGATATCCGGACTTTTAAAGTGCAGGAATGGGCAACTGCCACCAGCCCCA  
ACATAAGTTGACTCTCACCAGCATATAGACTTGGTACTTGTACAGTTAACCAGAGACTAGGTATGACTTTAACCGTTAAA  
GGATAATGGCAACCCCAACATCCATTAGTATTACCATGGATTGCGGTTTATAGTTCTCCACTGAATAGTGACATAGCACA  
AAGTAGATGCAACATCAAAGTACAAGAAGATTTACATACCTTCCTTCGGTTTCGGATTACGTGTTGAAGCATGCTCTACA  
GCGGGTGATTTTCTCTCAACCATTCTGCTGTCCACCAATAGCTGCA

BPB-8101

TGCAGAAAAGGTAGCACCAGAAAACGTGCTACACTGGTGGATTCTACTAATCACCATGGCAATATATTGAATGCAACAAA  
TAAACTTAAATTTGGACACGGTTCAGTTGTCTCAGAAACCACTATCCCATTACCATGGTCAGAAATGGTACTGTGTTTATA  
TTTCAGGAGGCACGGCCAAGTTTGCCATTCGGTACAGGAGTAAGAAAAAGAAAAAGAAACAGGCGTGTACTTGATTGTG  
ACCAAACATAAAATTACAGAAATGGATCCATGGAGATATCCGGACTTTTAAAGTGCAGGAATGGGCAACTGCCACCAGCCCCA  
ACATAAGTTGACTCTCACCAGCATATAGACTTGGTACTTGTACAGTTAACCAGAGACTAGGTATGACTTTAACCGTTAAA  
GGATAATGGCAACCCCAACATCCATTAGTATTACCATGGATTGCGGTTTATAGTTCTCCACTGAATAGTGACATAGCACA  
AAGTAGATGCAACATCAAAGTACAAGAAGATTTACATACCTTCCTTCGGTTTCGGATTACGTGTTGAAGCATGCTCTACA  
GCGGGTGATTTTCTCTCAACCATTCTGCTGTCCACCAATAGCTGCA

BPB-1241

TGCAGAAACGCGCACGTGACGCATAAAGCCCACCAGAGACATGCCGTTGTGCAAAAGGGCAGCAACTTGACGCACAACGC  
GTGGAACCTCCCTCGCTGGGTGGCTTCGCCAGCAGTTGTAATTTCTTAAAAATGTTAAACAACCTTTCTTTCTCTTTTTTCC  
TTTCTGTTTTTATTTAAAGAAATGTTTTTATTTTCAAAAAATGTTCTTCAAATTTCTTTTTTTGCTTTTTAAATAATTG  
TTCTGGATTTTCAAAAAGTGTTCTTGATTTTCAAAGAAAATATCTGGATTGGAATAATGTTTGAGAAATGGAAAAGGTG  
TTCCAGTATTTGAAGAAATGTCCGGATTTTCAAAAACATGTTTCGGGAATTTGAACTTTTTTTTTTCGGAATTTTGAATAAA  
TGTTTCGGAATTAGATAAAAATGTTCCGAAATTTTAGAAAAATGTTTGGAAATTTTTATCTAAATGTTTCTGATTTTTTCAA  
GAAATGTTCCGAAATTTTACAAAATGTTCCATAATTTGAAAACATGTAGAATTTTCGAAATCGTGAAAACCGTTCTGGAA  
TATAGAAATAAGTTTTGAGAACATGAACATTTGTTTCAATTTGTGAATAAATTTTCAATATCGCTAACAGTTTCAAGCATC  
AGACGAAACTGCA

BPB-8022

TGCAGTTTTCGTCTGATGCTTCGAACTGTTAGCGATACTGAAATTTATTCACAAATTGAAACAAATGTTTCATGTTCTCAAA  
ACTTATTTCTATATTCAGAACGGTTTTTACGATTTTCGAAAATTTTACATGTTTTCAAATTTATGGAACATTTTGTAAAAT  
TTCCGGAACATTTCTTTGAAAAATCAGAAACATTTAGATAAAAATTTCCAAAACATTTTCTAAAATTTTCGGAACATTTTATC  
TAATTTCCGAAACATTTATTCAAAATTTCCGAAAAAAAATTTCAAATTTCCCGAAACATGTTTTTGAATAATCCGGACATTTCT  
TCAAATACCTGGAACACCTTTTCCAAATTTCTCAAACATTTTTCCAAATCCAGATATTTTTTTTTGAAAAATCAAGAACACTTTT  
TGAAAAATCCAGAACAAATTTTAAAAAGCAAAAAAAGAAATTTGAAGAACATTTTTTGAATAAAAAACATTTCTTTTA  
ATAAAAACAGAAAGGAAAAAAGAAAGAAAGAAAGTTGTTTAAACATTTTAAAGAATTACAACCTGCTGGCGAAGCCACCCAGC  
GAGGGAGTTCCACGCGTTGTGCGTCAAGTTGCTGCCCTTTTGCACAACGGCATGTCTCTGGTGGGCTTTATGCGTCACGT  
GCGCGTTTTCTGCA

BPB-7395

BPB-6579

TGCAGAAATTATTGACTGTCCTATATGGTTCTACACATTAACATAGTTATATTGACTGCACATGGCAACCCACATGTTCATGAAC TAGAGGACTGGTAAATGTAGCCAACTTTGCTGATGTATAACCATCTGGGAGCTGTGATATTTTCTAGTGG GGTGGTGTGGATGCAGTGGTGCTCCTCACTTAGCATAGTAAAAACAGTAATTATAAATAGTGATAAGAGNNATGAACTAAT GATAGTATCTGCTTAACTTTTCCCTTGA

BPB-0882

TGCAGAAATTATTGACTGTCCTATATGGTTCTACACATTAACATAGTTATATTGACTGCACATGGCAACCCACATGTTCATGAAC TAGAGGACTGGTAAATGTAGCCAACTTTGCTGATGTATAACCATCTGGGAGCTGTGATATTTTCTAGTGG GGTGGTGTGGATGCAGTGGTGCTCCTCACTTAGCATAATAAAAACAGTAATTATAAATAGTGATAAGAGTCATGAACTAAT GATAGTATCTGCTTAACTTTTCCCTTGAACAAATGACTTAAAGTTTCTCATGGGAGTGTTTTTTTTCTTTTGAGAAAACGC AAGAAGCCTTTGCGTTTCATTGTATAGAAAAGAGGGGGGGGGGTACATCCTCCTAAAAGGCTGCA

BPB-3879

AGTGCAGCTAGCTACAGACAATGTGATGAATGATTTTGGGTGAGTGATCAGACATTGCGCCAACCTCAGGCAACTTGCAAG CTGCTGTATTTTCCAGTGGGCATTGCAGATTCACAATTAACATGGGGTCCCTCGTGCCAGACCGGTGAGTATGGCAATCTC CAAGCCAAGCTCCATCACACACCAAACACTTGCTCCAGCACAAATTTGTGGCTGCTCATGGTCTTGTCTCCTGCACATGGCA GGCTGAGATATAAAAACCATGGCTAAGTATCTCTAAGCACCATCGCTCCATCCACAGGACAAAGCATTTCCAAGCTCGAGC TGACAGAACAAATCTCTTCAGTTTTTCAGAAACACAAGAAGCTACCATGGTGAGTGCCACGAGACTTGCTCAGCTGGCCAAG AAATGGCAGAGAATGGCGGTCCCTCGGAAGGAAGAGGCTCACTTGGTCATCGGCGGTGCTCGAAAAAGCAATCGAAGGACC GTGCAGCGCTCGTATTCGGTGGTGGCTGGCAAGGGCCACTGCGTTGTGTATACGGCTGACGGTGTACGGTTCGAGGTGC CGCTGGCGTTCCCTAGGCACGGTGGTCTTTGGCGAGCTCCTAAGGTTGTGTCAAGAGGAGTTTGGCTTCGCAGGTGGTGAC GGCAAGATCACACTTCCCTGCGATGCAGCGTTGATGGAGTACGCCATGTGCTTGATTAGGAGAAGCGCCTCCGTGGAGAT GGAGGTAGCGTTCCCTCGGCTCCATGGCAATGACATTAACATGCCACTATGATGCAAGTTGTGTGGTTTTACAGTGTGGGAG TTGCCCAGCATGTTGCTCTCTGCA

BPB-6126

TGCAGGCATCATCTTCTCTTGCTTTACCTTATCGTTTGCTGGTGTGGGTGAAAGAGGAGCAGTGCTTTTTAGCTTTGCAT CTTTCCCTTTGCTTTGCCCTTGCGTGGCTTCCCTGAATCATATGCATTCATCGTGAGGTATAAGGTATCAGTGGAGGATC GACACGGATTTTGTGCGATCAGCCTATCAATTCAACTTTTCATGGCGCGAGCAGATGAGTTGACAAGAGATGAATTATC AACAAATCAAGAACAAGGAAGCACAGAAGACAAAATATCAGGATCAAGGAGTGATTGTTAGAAGTAATATTGTCTAGCCT GAGTTAGTTCGTAGTACTAGTGGCAAATTCCTAAATATACTACTCCCCCGTTTCAAAATATAAGTCTTTTTTAAAGATTCA ACTAGATGATTACATACGGAGCAAAATGAACGAATTTACATCTTAAATGTGTCTATATACATTTCGTGTGTAGTATTCTA GTGAAACTTCTATGTAGTGCCCTTGACAGTCACTGTGTTCTAGTAATACAAGTTGTAATCAGGTTTGGTGTACGGTGGCG TGCAGGTACAGGTTCCGGTCCCTGCTGCATCATCAGCTCGGCCAGCCTGAAGCCTGAAATCTGCAATGTTTTTTTTTTCAGG TCATGGTTGCACGCACCATGATATTCTTCCCTGCTAAAACAAATACCTTGGATGATTAGCAAAACAAAAGCACGGCCTGT GTTCGAGTTTTTTAAACCAACGAACCTTTACATGATCGGTGCCTGACTAATACCACCCTGCTCATCGGCTGCA

BPB-4583

TGCAGGGAGATCAGGAGACAATGAGGATTATGCTATGTATGAAGAGGAAACGCCCTACATATTGATATCAGAAGGTTCA CGTACGCAGAGCTGAAGCACATAACAAACAACCTCCATTCAATAGTTGGAAAAGGAGGTTTTGGAACTGTTTATCATGGC ACAATGGAAAATGGTGATGAAGTAGCTGTTAAGGTGCTTATGGAGACATCAATAGCGGAGTCAACAGATTTCCCTCCCTGA GGTATACCACAAAACCACTAGGTCAAATCAATAATTTCTTCAATAGAAAAGTAACTATAAGTGTGCAATATATCAACCC TTTCCAGAGTCCATATCCAATTAAATAATACAATTTGTCTTCAGCTCTAGGATGATCGGTAACATATCTGTTGCTGCA

BPB-6135

BPB-0710

TGCAGGAGCAACCATGCATTCATATAGACACCACCGGGGGGAGGGGAGTGTTCAAGTAAGAACACAAATGTGAGAAAGAC TCTGACTACAAGGAAGCATAAGAATCAACCCAGACCCTGAGGAGGGTCAGAGATGCCCTCCTTAAATCTAAAGGATTGAAC ATGGACTTCTTTTAGGACGAGCCATTGTCTAATAGCGGCTATTTTGCCAAAAAATCTATGTGTTCCCTTTGTTTCCAGAT TAAGCCAACAGGCCACGACAAAGATGCCTAAGAATCAATTCCTGATAAACCAGCAGTACAGTGGTGCAGGATGTCTTCC ATACCGTTTCTCTGCCGGTCTGCACAACTGAATGCTAAGCTTGTTCGAATAGTTGACATTTAAAGGGGCCCTTAAAGGAAA GATAGATGCTGGTTTTCCATGCCATTTCTACAGCCCGTTGCTGCAAAGGACACAAGGGTTACCATTGGAGAAAGTGAAGC GCCGCCGCGCAAGAATTTCTTTGTGTTTACATGATCAAACATAATCTATGTCCAGAACTCAATGCTGCA

BPB-3241

TGCAGCCGAATCCAATAGGTCTTAACTGGTGTGTAACCTTACTGTTCCAAACGCCTGCCAAAGCAGTCAAAGTAGTATTAC  
 AGCGTAGTATATTTAAGGAACCTGCATTTTGCATAGAGCACACCTAGGCGGGTTTATTTCTTGAATTAAGGCCCTGTTGT  
 TTCTTTAAAAAGTCTTAGGACTTTTTTAGTCCCAACTAAAAAGTCTTTAGTCCCTACCCGTTTCTTTCCAAGGACTAAAC  
 ATGGACTAGAGGTCACATAAATGACATGCAAAAAGATCATGTTACTCCTAGTAATATACTAGAAGTTATTAATGACATGC  
 TAAAAGTAGGGGCATTGTTGAAAAAAAAGCCAAGAAAGTCTCAAAAAGTCCCTCCCATAGAGACTTCTTCTTTTAGTCC  
 CAAATACCCCTTTTAGTCCCTAAAAAGTCCCTTCTGTTTCTTTTACATGGGACTAAAAGGGATTTTTTTTAGTCCGTACAT  
 CAAAAAGTCACTGGAAAGAAACACCCCTAACAGTACTGATATTAGTGGGCTCGCTACTTGCCCTGTGAGCTTACTGCTG  
 GTTACCTGCA

BPB-4115

TGCAGGTAACCAGCAGTAAGCTCACAGGGCAAGTAGCGAGCCCACTAATATCAGTACTGTTAGGGGGTGTTCCTTTCCAG  
 TGACTTTTTTGATATACGGATTAAAAAATTCCTTTTAGTCCCATGTGAAAGAAACAGGAGGGATTTTTAGAGACTAAAAG  
 GGGTATTTGGGACTAAAGGAAGAAGTCCCTATGGAAGGGACTTTTTGAGACTTTTTTGCCTTTTTTTCCAACAATGCCCC  
 TACTTTTAGCATGTCATTTAATAACTTCTAGTATATTACTAGGAGTAACATGATCTTTTTGCATGTCATTTAATGACCTC  
 TAGTCCATGTTTAGTCCCTGAAAAGAAACGGGTAGGGACTAGAGACTTTTTGGTGGGATTAAAAAAAGTCCTAAGACT  
 TTTTAAAGAAACAGGGCCTTAATTGCAAGAATAAACCCGCCCTAGGTGTGCTCTATGCAAAATGCAGGTTCCTTAAATATA  
 CTACGCTGTAATACTACTTTGACTGCTTTGGCAGGCGTTTGGAACAGTAAGTTACACACCAGTTAAGACCTATTGGATTCT  
 GGCTGCACTGGATCCGTCAAGGGCGAATTCACAGCACACTGGCGGCCGTTACTAGTGGATCCGAGCTCGGTACCAAGCTTG  
 CGGTAATCATGGTCATAGCTGTTTCCCTGTGTGAAATTGTTATCCGCTCAC

BPB-8771

TGCAGGATGCAGCAATACACTTTCGATGTTTATATTTGTGTCTTGTTTTTCAATGTCATCTTCTGCATGCATTTGTACATG  
 TCAGCCTGTCAAACCTGTAGTATGTCACCTGTTAATCCTTACTTGATTTGCTTGCCTGTCACCATTATCAGCCTGTCTCACA  
 TTTCTGCTAAGCTACTTGGTTATTTGTTATCCCTAACCTAACATGACTCTTGGTTATTTGGTTATCCCTTCTAATCTTGCTAT  
 AGATTATCCGTTGTGCTCTTCTGCCTGTTTGATCTGAGTATTATTGGAACAATATCTGCTACTCTGAATTTGTGCTGAAT  
 CATATTAAAAGTAGTTATATTTGACATTTGGTGTGCCGTGATTGATGAATTTGCGATGGTTATGTTATTTTTATCCGGCC  
 TGTTGTGCACCGTTTGNNTACTTTACCTAGATCTGTTGTTTTTGGCCAGTGNTTGCCAAAGGCATAAAAAGTAGTCACAA  
 TTGAATCAAATA

BPB-8731

TGCAGAGAGAGAGAGCATGTTCTGTTCTGCTTCTACAAATCCTGAACCAGATTTTCTAAGCACCTCCGAAAAAGTTAATA  
 CAATTTTCATGAAAAAAAAGATCACAAATTCACAAAAAAAATGTTTACAAGTTCAAAAAACACTTCATGAATTTGAAGAAA  
 GTTCATACATTTTAAAAGTTGTCAAAATTTGAAATAGTTCAAGCATTTTCATAAAGAATAAAGAAAGAACATAAAAAACAC  
 AGTTCATAAAAAATTAAATGAAAAAAGAAATGAAAGACCTTTTTATTTAAAATAAGTTTACAAAATTTCTCCACGAATCTG  
 ATTTTTTTTTGGTTAGTTTCAAAATAGTTTTTGGAAATTGAGAAAAGTTCAAATAATATAAAAATACATAAAAAATTCATGAAT  
 TTGAAAAAAATTAATAAGAACAAAATTTTCATAAAAAAATAGCCAATTTTAAAAGTTTCACAAATTGAGAAAATGTTTCATGC  
 ATTTGAAAAAAGGGAGAACGAAAACGAAAATGATAAAAAACAAGACAAGAACGGGCCGAAAAAATGTGAAACAAAAGGAAA  
 ATGTTTAAAACAACCTGGATGATATCTGAAGGAAATAAGTCGTCTTTCCCGCGTGACATGCGTCCCTCCTAGGGCCACGCAC  
 CGCGTCGCTGCTTCCCTTATCCTTATCCTTAGCGTCAACGCGAGCCGCTCATTCCTTCTCTTCTATCCAGTGAGATCGCT  
 ATTCCTCTTCCATTTTCTAGTTCTGCCACACAGCTAACCATCTTTTGCATGCTATCAGCCCTCGTCGGAGCAGCTGTGGG  
 CGGCTTGTAATGTTCCAGCGGCCGACAAATTTGTAGCAAACCTGATTCAACCTGCA

BPB-3700

TGCAGAGCTTGCGGACCTCTCCCTGTGTGCCGGTTGCCTTGACATGTGAGACTAAATATTTCCACATGTTGCCTTGAC  
 AAATGGGCTGCGTGGGCCCTCTAGGATTTATTTAGGGATTTCTGAAATTATATATTGGGCTGGCACAAAACCTAGATAAAAT  
 TCCAGCATGCAATGCGCCTTAAACCTTGATATATTATGAAAATACACATAAAATTTTAAACCGCGTCTTCTAAACCGCGACGG  
 AGGTAGTATATATAGTAGAGATATGTGACTGAAATGTATATACGTGCACAACATCAATCCTGTTATTTGTTGATCTCGATC  
 ATATTCCTCCGTTTCCCTAAATATAAGTCTTTAAAGAGGTTTCATTAATGGACTACATACGGATGTATATAGACATACTTT  
 AGAGTGTAGATTCACTCATTTTACTCCGTATGTAGACTTCTAGTGAAATATCTTAAAAGACTTATATTTAAAACGGAGG  
 GAGTATAACGTAACATTTTATTAGAAAGTGATCAATGCCACCCAAATCAAAGAATGGAAGGTGCGGTGAGAAGTAAGTA  
 CATCAAGATGAGTCCGAATAAAACCAAAAAGGAGATAAAATACAACCAATCCGACTGGAAATAAACACAAACGTCTCGCC  
 ATTATCGGATGTTTCCCTCAGAAAATGACGACGATGATATCATCAGTTGAACTTGCTGCA

BPB-3910

BPB-8462

TGCAGAGCTTGCGGACCTCTCCCTGTGTGCCGGTTGCCTTGACATGTGAGACTAAATATTTCCACATGTTGCCTTGAC

AAATGGGCTGCGTGGGCCTCTAGGATTTATTTAGGGATTTCTGAAATTATATATTGGGCTGGCACAAAACCTAGATAAAAT  
TCCAGCATGCAATGCGCCTTAAACCTTGTATATTATGAAAATACACATAAAATTTTAACCGCGTCTTCTAAACCGCGACGG  
AGGTAGTATATATAGTAGAGATATGTGACTGAAATGTATATACGTGCACAACATCAATCCTGTTATTGTTGATCTCGATC  
ATATTCCTCCGTTCCCTAAATATAAGTCTTTAAAGAGGTTTCATTAATGGACTACATACGGATGTATATAGACATACTTT  
AGAGTGTAGATTCACCTCATTTTTACTCCGTATGTAGACTTCTAGTGAATATCTTTAAAAGACTTATATTTAAAAACGGAGG  
GAGTATAACGTAAACATTTTATTAGAAAAGTGATCAATGCCACCCAAATCAAAAAGAAATGGAAGGTGCGGTCAGAAGTAAAGTA  
CATCAAGATGAGTCCGAATAAAACCAAAAAGGAGATAAAAATACAACCAATCCGACTGGAAATAAACACAAACGTCTCGCC  
ATTATCGGATGTTTCCCTCAGAAAATGACGACGATGATATCATCAGTTGAACTTGCTGCA

BPB-4058

TGCAGCGAATTAAATTATTCTACTACAGAAGCAAGCTCGAATTGGGCTTGTAGTTGGTGGCGCACCTGCACATAGAAGACA  
CTATGGGCATGGAGGACAGAGAGTTGTAGATGTGGAAGCAATTGTCGCCATGGCGTGGCGCAAGTGGTGAAGACCCGTT

BPB-3887

BPB-1420

BPB-4970

TGCAGATATTGAAGAAAACTTGAGATGGCATTCGGAACAAGGGAAATAGAACCACAACGTCCAAGTTGGTTTTCTACTAA  
TATGAAAACAACAACCTAGCAGATATTAACAACAATGAGACTATCAAAGGGCACACAATTTTATATAAAATGTAACCTAAGT  
CTCTCTTTTCATAGTTCCCTTTGTTCATCATGCAGATTCCTTGGCCAGATTGGTTTCGTAAGTCATAGTGAATAAACTTAAAC  
AGGAGAGATTTGAATCATCTACAGGCATACTCCCAACACAAAACCTAGAGTCATAAAAAGTTGGGTAAAGAAATGGACAGAACAA  
CATAGACATCACAATAAGCTACATATGCTAGCCAACTACATGAAAAGGTGAACAAGAACAAAACGTACCTGATGCATCG  
TATAGGTTGTAAGGTAAAACGTGAGCTCATGCGCGAAAAGTGTTACCATAACAATTAGCCCGAGAATCGTCACTGCCAAC  
ATACCAACGATGGCGCGTATTAGACACAAATCTCCAAGATATAAGCATCCATTAGCAGAAAACAGTTCACGAGGCAGCAT  
ATTATGTATCTATGTACCTATAGCACCCGAGTAAGTCTTCTTCAGCAGGTGGTCTTCGGCGTGCGGGAACGCATTGAAGT  
TCTTCAGGGAC

BPB-4318

TGCAGATATTGAAGAAAACTTGAGATGGCATTCGGAACAAGGGAAATAGAACCACAACGTCCAAGTTGGTTTTCTACTAA  
TATGAAAACAACAACCTAGCAGATATTAACAACAATGAGACTATCAAAGGGCACACAATTTTATATAAAATGTAACCTAAGT  
CTCTCTTTTCATAGTTCCCTTTGTTCATCATGCAGATTCCTTGGCCAGATTGGTTTCGTAAGTCATAGTGAATAAACTTAAAC  
AGGAGAGATTTGAATCATCTACAGGCATACTCCCAACACAAAACCTAGAGTCATAAAAAGTTGGGTAAAGAAATGGACAGAACAA  
CATAGACATCACAATAAGCTACATATGCTAGCCAACTACATGAAAAGGTGAACAAGAACAAAACGTACCTGATGCATCG  
TATAGGTTGTAAGGTAAAACGTGAGCTCATGCGCGAAAAGTGTTACCATAACAATTAGCCCGAGAATCGTCACTGCCAAC  
ATACCAACGATGGCGCGTATTAGACACA

BPB-6179

TGCAGCAGCACCGTTTTAGTTAATGTTTCGGATCCACATAAAGATTACAAATTAAATTATAAAAAGAACATAAATAGGACAC  
TTTGATAGGTTATATCTCAAAGTACATATGCAATTTATATGCAAAAAGAAATATGTAAACTAAACTTGTACAACACAAATA  
TTATATGCACCTTCGGTTCATTTTTGAAAATACCAGATAAATGGAGATTTGATGTGTATAGTTAGAAGAACCAACATGTC  
TCTACATAGAAAATAAGTGTTGGCCATGCAAAAAACATCCGTAATCATGTTTGCTAGAAAATAATAGTGGACTATATTGGC  
GTCGTTTGATTGGACTTGAAAGTTTGCTCAATAAAAAATCCTATGAAATTCCTTTGAATTAAAGGAGCCCTTATTTCCCTAT  
AAGTTTCCCTATTCCCTATAATAATTAATATTACCAAAGGAGACCTTATATTTAGGAACGGAGGGAGTAAAACCCCTTCGTCA  
CATTTATCGAAGGTTCTTTTGCGGTGAGTTTTCTTTGTTCATTGTGATAGTCGACGTCAGTGTTCCTACTGCA

BPB-4595

TGCAGCAGCACCGTTTTAGTTAATGTTTCGGATCCACATAAAGATTACAAATTAAATTATAAAAAGAACATAAATAGGACAC  
TTTGATAGGTTATATCTCAAAGTACATATGCAATTTATATGCAAAAAGAAATATGTAAACTAAACTTGTACAACACAAATA  
TTATATGCACCTTCGGTTCATTTTTGAAAATACCAGATAAATGGAGATTTGATGTGTATAGTTAGAAGAACCAACATGTC  
TCTACATAAAAAATAAGTGTTGGCCATGCAAAAAACATCCGTAATCATGTTTGCTAGAAAATAATAGTGGACTATATTGGC  
GTCGTTTGATTGGACTTGAAAGTTTGCTCAATAAAAAATCCTATGAAATTCCTTTGAATTAAAGGAGCCCTTATTTCCCTAT  
AAGTTTCCCTATTCCCTATAATAATTAATATTACCAAAGGAGACCTTATATTTAGGAACGGAGGGAGTAAAACCCCTTCGTCA  
CATTTATCGAAGGTTCTTTTGCGGTGAGTTTTCTTTGTTCATTGTGATAGTCGACGTCAGTGTTCCTACTGCA

BPB-0835

TGCAGTGAACACTGACGTCGACTATCACAATGACAAAGAAAACCTCACCGCAAAAGAACCTTCGATAAATGTGACGAAGG  
GTTTTACTCCCTCCGTTCCCTAAATATAAGGTCCTCTTTGGTAATATTAATTATTATAGGAATAGGAACTTATAGGAAAT  
AAGGGCTCCTTTAATTCAAAGGAATTCATAGGATTTTTATTGAGCAAACCTTCAAGTCCAATCAAACGACGCCAATATA

GTCCACTATTATTTCTAGCAAACATGATTACGGATGTTTTTTGCATGGCCAACACTTATTTTCTATGTAGAGACATGTTG  
GTTCTTCTAACTATACACATCAAATCTCCAATTATCTGGTATTTTCAAAAATGAACCGAAGGTGCATATAATATTTGTGT  
TGTACAAGTTTAGTTTACATATTTCTTTTGCATATAAATTGCATATGTACTTTGAGATATAACCTATCAAAGTGTCTTAT  
TTATGTTCTTTTATAAATTAATTGTGAATCTTTATGTGGATCCGAACATTAACATAAACGGTGTCTGCTGCA

BPB-1719

TGCAGTAGTTAACCTATAGAAAAGAGTATTGTTAATAGTTTCTTATTTTGATTGGCTTGCCAAAGCCAAGCCAGACAGGGG  
ACGACAAAGAGTCTCATGTTGTTTGCCAATAGAGACCCATCATGATGATTTTTTAGGCAGGGGGAATGGTAGTTTCCATGT  
GTTCTCTATTCCCTATTGTTGACAAGTTATTTCTTCGGTACTTCTAACGCTGACGTTGGTATTCTTTTTTCGGTGGTTTT  
ATCTTACGGATCTACAGACACGGAAATCGTACGTGTTTATGCGTACTGGTGTGGTTCGGGTGCTCGTTGAATCAGATGCT  
GGGAGGGGGCAGGTCTTGGAGCTGTTCCGGTAGCAAACCTCCACAGGAACTTCGGCTGCATCTGGGCTGCA

BPB-0799

BPB-5766

TGCAGTGAGCTGGATGATGAGAGCTGCATTACACGCTCCTCATAGTCATGCTTGACCTCTCCAAGTATCTTCAACACAGA  
AACAGCTGGGAAACAGTTTAATACTTTTGAAGATGATGATTTGCTGCTGCTGCTGCTAAGATGAGATACATCTAATTCGA  
GACTCTTAACTGAACGGAACACACTACTGCCATCCAGCCCTTCAGGGAACAAACCGTCGCATCTTCCGACAGTCATATCT  
TCTACTTTTATCCAGATTGGGGGAGGCCAAACCACCGTCATACCCCTCTGTAACAGCCAATTTCTTTCCATCATAATAAAA  
AAACGTTCCCAAATCAGGTTCGCGGAAAGCCTTTTCTCCTTGAATTATCTCTTTTAAACAACAAAATATGTCAGTTTGGAGG  
TGTGAGGCATGGAAGGCAGAGACATCTTGGGGCACCCAGAACTTCAAGTCTGCGCACATTTGGTGCAACATACCTCCGAC  
AAGGGCATCACACGGAGATTGGGACAACGGACGCATTCGATTATTTCAAGACTTGGAAGGAACAACAATTAGGTTCCAC  
AACCATTTCAGCAAGTTCTGGCATCTCATAAACTCAACTTCCTTCAAGCGCATAAAACATTTGCCTGAAGCGCCACCAC  
AGACAGGCCCAAACCTGAAGCATTCAGAAAATTTTCCCTCAATTTGAGTCCCCTTGAGATTGGTAGCTTCGCAAAAGGTGGG  
AGGGTGCTCCNAGATACGCCCTTGATAGAGTGAGAGTCTCTANACTTGT

BPB-7360

TGCAGGTTAACAAGTTTAGAGACTCTCACTCTACAAGGCGTATCTTGGAGCACCCCTCCACCTTTTGCGAAGCTACCAAA  
TCTCAAGGGACTCAAATTGAGGAAAATTTCTGGAATGCTTCAGTTTGGGCCGTGTCTGTGGTGGCGCTTCAGGCAAATGTT  
TTATGCGCTTGAAGGAAGTTGAGTTTTATGAGATGCCAGAACTTGCTGAATGGGTGTGGAACCTAATTGTTGTTCCCTTT  
CCAAGTCTTGAAATAATCGAATGCGTCCGTGTGCCAATCTCCGTGTGATGCCCTTGTTCGGAGGTATGTTGCACCAATGT  
GCGCAGACTTGAAGTTTCTGGGTGCCCCAAGATGTCTCTGCCTTCCATGCCCTCACACCTCCAACTGACATATTTTGTG  
TTAAAAGAGATAATTCAGGAGAAAAGGCTTTCCGCGACCTGATTTGGGAACGTTTTTTTTATTATGATGGAAAGAAATTG  
GCTGTTACAGGAGGGTATGACGGTGGTTTGGCCCTCCACAATCTGGATAAAGTAGAAGATATGACTGTTCGGAAGATGCGA  
CGGTTTGTTCCTGAAGGGCTGGATGGCAGTAGTGTGTTCCGTTTCAAGTCTCGAATTAGATGTATCTCATCTTA  
GCAGCAGCAGCAGCAAATCATCATCTTCAAAGTATTAACCTGTTTCCCAGCTGTTTCTGTGTTGAAGATACTTGGAGAG  
GTCAAGCATGACTATGAGGAGCGTGAATGCAGCTCTCATCATCCAGCTCACTGCA

BPB-4725

BPB-9244

TGCAGGTTAACAAGTTTAGAGACTCTCACTCTACAAGGCGTATCTTGGAGCACCCCTCCACCTTTTGCGAAGCTACCAAA  
TCTCAAGGGACTCAAATTGAGGAAAATTTCTGGAATGCTTCAGTTTGGGCCGTGTCTGTGGTGGCGCTTCAGGCAAATGTT  
TTATGCGCTTGAAGGAAGTTGAGTTTTATGAGATGCCAGAACTTGCTGAATGGGTGTGGAACCTAATTGTTGTTCCCTTT  
CCAAGTCTTGAAATAATCGAATGCGTCCGTGTGCCAATCTCCGTGTGATGCCCTTGTTCGGAGGTATGTTGCACCAATGT  
GCGCAGACTTGAAGTTTCTGGGTGCCCCAAGATGTCTCTGCCTTCCATGCCCTCACACCTCCAACTGACATATTTTGTG  
TTAAAAGAGATAATTCAGGAGAAAAGGCTTTCCGCGACCTGATTTGGGAACGTTTTTTTTATTATGATGGAAAGAAATTG  
GCTGTTACAGGAGGGTATGACGGTGGTTTGGCCCTCCACAATCTGGATAAAGTAGAAGATATGACTGTTCGGAAGATGCGA  
CGGTTTGTTCCTGAAGGGCTGGATGGCAGTAGTGTGTTCCGTTTCAAGTCTCGAATTAGATGTATCTCATCTTA  
GCAGCAGCAGCAGCAAATCATCATCTTCAAAGTATTAACCTGTTTCCCAGCTGTTTCTGTGTTGAAGATACTTGGAGAG  
GTCAAGCATGACTATGAGGAGCGTGAATGCAGCTCTCATCATCCAGCTCACTGCA

BPB-7292

TGCAGGCATGGATGAAACAATCATAAGAAGATGCTGTGAGCGAAGCTAGCTGGTGGTATACCACTACCACGTGCACTAAA  
CTCATTTGCACGTGATGTGAGTTAAGCTCACAAGTTATTCAGCATCTGAATTAGCCAATTGATCATGGATTTGTGGTCAA  
TATACATCTTCACAATCTCTTCTGCTGCCCTCTCTAGCTAGTGAGGGAGTGAGTGACACTGACCAGACTAGCTAGCTAGGT  
AGTGACATCCTTTGCAGTAGCCAATTGATCAAGGAGGGGGACAAGTCACAGAATTAATCTACAATTCGCCCCACAGGCTGC



TCCGTCATCAAGTCAATGTAGCCGCTTGGTTTTCTACTCAGTTACATTGGGATTACCTTACCATTCTGCA

CHR. 6H

BPB-5926

TGCAGGAGTATGTAGCTCCTCCAAAACTTATTTGTACAAATGATATAATTAGCACATTTTCATAACCTTTTCATTTCATT  
ACTGTATATTTCCGTACCGTGTAACCGAAACATTTTTCAAACAGGATAGAAGTCATATTACAACAACCTTTTCTTCATT  
TCGTGCTTCGGGATTAGTCTTTGCAGCAGTATGTGGCTCCTTTTCTATAGAAATCATACATCTTTAGCACCATTTTCGTA  
CCCTCTTTTATTCATCACTCTATATTTTCACTTCATGTCAAATGAAAATATATTTGTATAGCATCTCCACATATTCAACT  
CACATTTCCATCATTTCAATCTTCAAGAGCAGTTGCCGTTGCATTATATACCTCACACAACGACTTACATGTGGAAATCG  
GACAACTTGTAATATTTATTCGTATTGTTTCGGTCCAACATGGTATATTTTCTCTTATCTGAAAATAAAAAATTTCAAATA  
GACGAATCGACATATGCTAGTAATCCCGCTTCATTTCTTGCTTTTGAATATGTCTCTACAGCAAGATGTAGCTCCTCCAA  
CAACTTATATATGGAATGATATCATTTAACACTTTTCTCGTAACCGTTTTATTTCATTACATATAGATTTTCTCTTCCCG  
GGGAAGTGGAATATTTTTCAAATAGGGTAGTCGCCATATTACAACATCATTTTCTTCATTTTCATAGTTTGCCACTACTTT  
GTGCAGCAGTATGTGGCTCCGCCCTTATGTAGGAATTATATATCATTAGCATCATTTTTGCATCATCTTAGTCAGTCACCT  
TAGATTTCTGTTTCGTCTAAAACCTGAAAATTATATTATATGGCATTGTGCGATAGATAAGAGTAGCTTTTCGACCAATTCTAT  
ATTACATCATAGTTTTTGTGTCATGATGTACCTCAAACAACAACCTTATATGTAGAAATCGGACAACTCGTAATATGTTTT  
GTACCATTTTCGATCCATCATGGTATATTTTCTCTTTTGTGAAACTGAAAAGTTGCTTAAATAGGAAAATTTACATATGAT  
ATCAGTCCTGCTTCATTTGTTGATGTCAAAGTTGTCTCTGCA

BPB-4754

CATGGCAAGATAAAAAAAGTTGTTATGATTGTGAGCCGTGATAATTTGAGTCCACCAAATCAATGTGTCAGGTCTACATG  
CGGATACGCAGTCTACGAAAGGGCGAATTCTGCAGATATCCATCACACTGGCGGCCGCTCGAGCATGCATCTAGAGGGCC  
CAATTCGCCCCATAGTGAGTCGTATTACAATTCAGTGGCCGTCGTTTTACAACGTCGTGANTGGGAAAACANNGGCNAGT  
GNNTTGTAATANNANNTCACATAGGGCGAATTGGGCCCTCTAGATGCATGCTCGAGC

BPB-2380

BPB-8937

TGCAGTAGATACACACATGACCTTTTATTTTTTTATAGAAAATTCATGACCTAATTAACATGGCAAGATAAAAAAAGTTG  
TTATGATTGTGAGCCGTGATAATTTGAGTCCACCAAATCAATGTGTCAGGTCTACATGCAGTTTGGCAATAGAGTAACAT  
AAATCATCACGTAAAAAAATTTCTTTTCATTGCAAAAAAGAAATCTGGAGTCTCCAAATAGATCTACACCATAATAACTC  
AGGCCACCGGATAAACGGCTCTCAACGTGTGAATTTCTTGGGAGTCTCTAATTAGTATTAGTATAGAAGTATAGATTAA  
CAACCTCTGCAACAATTTATTAAGCAAACGTGAGTACAAAAGTACTCAGCAAGACTTTGTGATAAACTATCTACTCATGC  
AATGTATCAATAAGGAATTGTGGGGTTTCATGCGGAAAGCCAACATTTGACTCATGGCTAGACAAGTTGCATTTTCAAAT  
AGTTTAGACAACCTTTGATTTCTCGCACACGAGTCCACTAACACCACAACAATACTCCATCATGGAACCATTCGGTCTCCA  
TACGGAATGCCGTCCACGACACTCACGCTTATCTTGACAATTTTATGAGTACCAACTATAGTTATCTATGAACAACATA  
TGTTTCCAAGTAGTCCATATCCGCGGACGTAGCTATTCTGAATAGATCATAACCCCTGCA

BPB-5433

TGCAGGGTTATGATCTATTCTGAATAGCTACGTCCGCGGATATGGACTACTTGGAACATATGTTGTTTCATAGATAACTAT  
AATTGGTACTCATAAAATTTGTCAAGATAAGCGTGAGTGTCGTGGACGGCATTTCGGTATGGAGACGGAATGATTCCATGA  
TGGAGTATTGTTGTGGTGTTAGTGGACTCGTGTCGAGAAATCAAAGTTGTCTAAACTATTTGAAAATGCAACTTGTCTA  
GCCATGAGTCAAATGTTGGCTTTCCGCATGAAACCCCACAATTCCTTATTGATACATTGCATGAGTAGATAGTTTATCAC  
AAAGTCTTGCTGAGTACTTTTGTACTCACGTTTGTCTTAATAAATTTGTTGCAGAGGTTGTTAATCTATACTTCTATACTAA  
TACTAATTAGAGACTCCCAAGAAATTCACACGTTGAGAGCCGTTTATCCGGTGGGCCGTAGTTATTATGGTGTAGATCTA  
TTTGGAGACTCCAGATTTCTTTTTTTTGCAATGAAAGAATTTTTTTTACGTGATGATTTATGTTACTCTATTGCCAAACT  
GCATGTAGACCTGACACATTGATTTGGTGGACTCAAATTTATCACGGCTCACAATCATAACAACCTTTTTTTTATCTTGCCAT  
GTTAATTAGGTCATGAATTTTCTATAAAAAAATAAAAGGTCATGTGTGTATCTACTGCA

BPB-6554

BPB-9447

TCGAGCGGCCCGCCAGTGTGATGGATATCTGCAGAATTCGCCCTTGAGTAGTGCCAGAACGGTCCATGGGTGTGCGCTTA  
CAAAAAGTTTCATTGATGCCCTACTGTTGCCCTTGCGAGAAATTTGTGTTATGCGACAGTCGATCCGGATACGCAGTCTACGA  
AAGGGCGAATTCACGACACTGGCGGCAGTTACTAGTGGATCCGAGCTCGGTACCAAGCTTGGCGTAATCATGGTCATAG  
CTGTTTCCGTGTGTGAAATTTGTTATCCGCTCAANNATAACGAATGNNTTGAGCTTGATTGNTTCCCTCCACGCTNNTGCAC  
AAGATANCCATCNCNCGATCGTCACTGATCCTCNNGCTGCA

BPB-7829

TGCAGGGAGCATGATTTGTTCTTACTCTGTCCCACAAAGCGAGTTGATGGCCTGAGAATATTAACATATTCTTAGCTTCGT  
TCAACTTTTTCACCTTTTCTTCCAGTAGCACTTTTACTTTAGTTAAATTTAAACATGTGTCTAATTTCAACAGAGAATTT  
ATTTTACTTTTAAATTTTCTGTGGTCAATACTGTCTCGGGCTATTTATGTGACCATAAAATGCACAAGAAATAAATATG  
ATTCTTTCACATACTAGAAAACACTTTGTGCTGTGTTATAGATCAGTTATCTAAAAATAAACTCACCTGACCATGATCTTGG  
GTTCTTGGGCAAGCAGCCAGTGACTTCTGCCGTTCCAGATGTTAATATCTAGATACAGTATCTCAAACTTCAGTTCTGC  
TGGTCGGTCATTCTTACCCAGTTATTTATCACATTAGCTACAATGATGGCCACATTTCCATCTTTGAGAAAACCTTCTCT  
TAAAGATGGGGATTTGCTGCCTTTGACTTTTGATTTACTTTCGTCCAGCTAGAATTAGTTGCAGCTCAGATTTGCTTATAG  
TACGGCTGTGATAGGGTCACTTTCTACATTTCAACAGCCATACAGAGAGCCACAAGTAACCAAGTGATGCGAAGAAGGCA  
AATGTTCCGGCGAGGCCATATATGTGACATGATGATCGGTGTTGCCAGGAAGCTTACGACGTTTCCAAGATGGAATCCTCC  
CATGGAAGGCCAACAGCAGTGGCACGTTTATGTGTTGGGAACCACCTGTTTCATGTTTCAAAAATGAAATTAANAGCCTG  
AACTGAAGTTAAGTTTGATTGCATCAATATATGTAGTGAATGNTTCATTTTCTGTAAGTAATTGGNNNNNNNNNNNNNN  
NNNNNNNNNNNNNNNNNNNNNNNNNNNNNNNNNNNNNNNNNNNNCAAGACCAGAGTGCAGCAGCACNNNCCATCACCTTCTTCCCCC  
GTATCGGTCCNCCAAAGCTCGTACAACCATGGATGAGAAAACATACCCCCATAGAAATGATGACTGCA

BPB-6071

TGCAGCTCAAGCCTCTAATGCGCAAGTAGTTTCGGCAAGATGGCCAAGCCTGTCAAGAACTAGGTACTAACGCCACAAAA  
TTCTACTTTGAAAAGTTGGAATGCACATGTTATGCTTGGTTTCTATGCTGCAACTCATTTGTTTGTGCACCTGCTCTTATA  
GTCATTTAACTTTTTTATGGATTGTACTGTTAACATTTAAGAAGTTTTCTGTTCATTGGAGATTTTGTTTTGGTCTTTGT  
TTTTAAATGGTGACCAAAGGTATATTGATGTAATTAGCCGTAAACAACAGGATATGAAGTGGTCAATTGGTTATTCAGTG  
AAATGTTTTTTACGCTTGGCATCTATATTCAACCGGTTAAGAAAATGTTTTTTATAAAATTAGATTACGTTAGTGAGC  
GTATATTAAATTATTTTTATCCGTTGCAACGCACGGGTATTTTTGCTAGTACACCTAAAAACGCCAAATAACATGGGCAC  
GGCGCAAACCCATATCTAGCGCCACCGGCACCGTTGAAACATAAAATGTGCTAACCGGCGCCTGCA

BPB-9873

CACTAGTAACGGCCGCCAGTGTGCTGGAATTCGCCCTTCGTAGACTGCGTATCCGGATCTATAACACAGCACAAAGTGTT  
TTCTAGTATGTGAAGAATCATATTTATTTCTTGTGCATTTTATGGTCACATAAATAGCCCGAGACAGTATTGACCAACAG  
AAAAATTTAAAGTAAATAAATTTCTCTGTTGAAATTAGACACATGTTTAAATTTAACTAAAGTAAAAAGTGCTACTGGAA  
GAAAAGGTGAAAAGTTGAACGAAGCTAAGAATAGTTAATATTTCTCAGGCCATCAACTCGCTTTGTGGGACAGAGTAAGAA  
CAAATCATGCTCCCTGCACTGGATC

BPB-1009

TGCAGGGAGCATGATTTGTTCTTACTCTGTCCCACAAAGCGAGTTGATGGCCTGAGAATATTAACATATTCTTAGCTTCGT  
TCAACTTTTTCACCTTTTCTTCCAGTAGCACTTTTACTTTAGTTAAATTTAAACATGTGTCTAATTTCAACAGAGAATTT  
ATTTTACTTTTAAATTTTCTGTGGTCAATACTGTCTCGGGCTATTTATGTGACCATAAAATGCACAAGAAATAAATATG  
ATTCTTTCACATACTAGAAAACACTTTGTGCTGTGTTATATATCAGTTATCTAAAAATAAACTCACCTGACCATGATCTTGG  
GTTCTTGGGCAAGCAGCCAGTGACTTCTGCCGTTCCAGATATTCAAATTGCAGTATAAATTGTCTTACAGGTGCATTTCTC  
CAATAAGTTTTTCCAGCAGTTGCTGCA

BPB-8075

TGCAGAAGAAGGGAGACATGGCCAAGGACAAGTTCTCCAAGGTCCTTTGGGGCGCCGTACCAACTACCGGACATGGATC  
TTTGTCTCCTCTATGGCTACTGCATGGGTGTGAGCTCACCCTGACAATGTCATTGCCGAGTACTACTTCGATCACTT  
CCACCTAGACCTCCGTGCCGCCGGTACCATCGCCGCTTGCTTCGGCATGGCCAACATCGTCGCACGTCTTATCTTGTGCA  
CTTCCCGTCGCTCTTGTCTATGGGCATCATGATCATGGCTTGTACACTTCCCGTCGCTCTTGTGCACCTCCACAGTGGGG  
CTCCATGTTCTTCCAGCCAGTGTGATGCCACGGAGGAAGAGTACTACGCCCTCCGAATGGTCGGAGGAGGAGAAAAGCA  
AGGGCCTCCATATCGCAGGTCAAAAGTTCCGCCGAGAAGTCCCGCTCGGAACGCGGTAGGCGCAACGTCATTTCTTGCCACA  
TCTGCCACACCACCAACAACACGCCCCAGCACGTATAAGATCCAAATTTTCTTCTACCAACCAAAATGTAAAGCTCGCAT  
AAATATACACATCATATATGTCTACTCCTGCCAACCCAGTTGTTCTGTACTTGTAGATGTTAGGAAACCTTCAACTTCA  
TCTGTCTGCA

BPB-2751

TGCAGCTCAGAGCTCACCGGCATAATAGCTCAACCAATATTTGCGACACCGTACCCACGAAGGAATCTCACACACATGCA  
TGCCTAGACTCGCCATTACGTCTACTTTCTTTCTTTATATAAAACATAAAAAAGAGGTTTTTCCCACTCGATTAAATTATGTA  
ATACTCCAGTGTGGAGTACATTGTAGCACCAAAAATAGTAGTTAAGCTGCAAATCCGATGGTACAACCTCGTCGGAAC  
ACACGATATATTAACCGGCAACAGCTGCGGCTGCAATGCCGCTGACGATATCGATCTTAGCTGCAACATTAAAGAGCACA  
GTAGCTAGTACTCCATCGAAGTGCAGCAAGCAGGTAGGTAGGCGGTGATCGAATCGACATGGACCTAATTAAGGGTTGT

AGTAGACGATCTTGATCTCGGTGACGCCGTGGCAGTTGCCGCCGGGGACGGAGTGCTCGAAGCAGTGGCCGCCGGTGTCTG  
CAGCCGGCGGTGGGGCAGTGGCCCTGCA

BPB-2628

CATGCTGGTAAAGTCCCAGAGAACTGATTATTGCTGAGATCAAGAAAGATGAGTCGTGTACATTTCTGCACTGGATCCGG  
ATACGCAGTCTACGAAAGGGCGAATTCCAGCACACTGGCGGCCGTTACTAGTGGATCCGAGCTCGGTACCAAGCTTGGCG  
TAATCATGGTCATAGCTGTTTCTGTGTGAAATTG

BPB-4315

TGCAGCGACGTAGATGTAAGACACCCAGCTTGCTGCTGTGTGAATGTTGGAATATGCAATCTGGGATTGTCGCCAATTGG  
TAATAGTAGTTATAATCTGGTAAGATGAAGCAGGATGTTGCCTCAGAAAGCACCATGCCAATATCATCAGGTAGCAGGCC  
CTTCTTGTGCTCCACCAAAGCCAAGTGATCATGAAGCCTGCACTGCATGTGGCGACGAATGACATCATCATTTACAGAAAT  
AAAGCCATTTTCGTAGAGATGTTTCTCTGTACAGCATCGGCTACTCCCCATGCCGACGTATCGCCTTGGCCTTGTATAATC  
CCATCGCATACAAAGTAGTTAGAAACCCAGTTCTCCCAATTGAACATACTGCAATGTTTGAGTGCATCGGCATACTGGAT  
GCACTTCTCAACTATTATATGGTTCATGTAAGGTTCTGGAATGCCGATATAAGCGGCAATCTCCTTGGACTCTTCCAATA  
TTGCTTCATCGCGGATGCAATCATCATGAAAATAATTGACCATAACATCAGTGTGCCCTCTCCATGTAATCAAACCGGGT  
CCAAACCTCCCGTGCGAGGTCCATAATACCTTAATACTCAAAAATGATATTACTGGGACTCCACACTCGTACAGATCAAT  
GTATTCATCACTCCCATTGTGAAATATCACCACAAATCTACTGCTAGCAAGCTTTATGAAGATTTCTGTTCTGATATCTT  
CTAGCACCCCTCGAGAGCCTTCGTCTATCCCACTGAAATCATCCTCCTCGTCTGCTGATCGAAGATGGCCATCACCGAC  
GGCGGAAGCTCCAGCTCCTCCGCGACTGCCTTCTGCA

BPB-7036

TGCAGCGACGTAGATGTAAGACACCCAGCTTGCTGCTGTGTGAATGTTGGAATATGCAATCTGGGATTGTCGCCAATTGG  
TAATAGTAGTTATAATCTGGTAAGATGAAGCAGGATGTTGCCTCAGAAAGCACCATGCCAATATCATCAGGTAGCAGGCC  
CTTCTTGTGCTCCACCAAAGCCAAGTGATCATGAAGCCTGCACTGCATGTGGCGACGAATGACATCATCATTTACAGAAAT  
AAAGCCATTTTCGTAGAGATGTTTCTCTGTACAGCATCGGCTACTCCCCATGCCGACGTATCGCCTTGGCCTTGTATAATC  
CCATCGCATACAAAGTAGTTAGAAACCCAGTTCTCCCAATTGAACATACTGCAATGTTTGAGTGCATCGGCATACTGGAT  
GCACTTCTCAACTATTATATGGTTCATGTAAGGTTCTGGAATGCCGATATAAGCGGCAATCTCCTTGGACTCTTCCAATA  
TTGCTTCATCGCGGATGCAATCATCATGAAAATAATTGACCATAACATCAGTGTGCCCTCTCCATGTAATCAAACCGGGT  
CCAAACCTCCCGTGCGAGGTCCATAATACCTTAATACTCAAAAATGATATTACTGGGACTCCACACTCGTACAGATCAAT  
GTATTCATCACTCCCATTGTGAAATATCACCACAAATCTACTGCTAGCAAGCTTTATGAAGATTTCTGTTCTGATATCTT  
CTAGCACCCCTCGAGAGCCTTCGTCTATCCCACTGAAATCGTCTCCTCGTCTGCTGATCGAAGATGGCCATCACCGAC  
GGCGGAAGCTCCAGCTCCTCCGCGACTGCCTTCTGCA

BPB-2768

TGCAGCATACTCAACAAAATGTATTACTTATTTCAGTCTTCACAGGCCGGCTTTATACCAAAGATACCACTACTTGTAGC  
ATCTGTATGTGCATGGTGTGGCAATGTCTTTTGTCTCAATGTCTTCGGTCACATCTATGGTGTGCAATCTTTTGTCTAAA  
CAACATGCCATATGCTTGTGCTTTCCAGCTGTCTGTGTGCTACAAATTTTGAAGGACGACTACNAGAACTACACTCAA  
TTGATGCAACCGCTCTTTATAGAATTGCGCTATCATCGGATCCCGATGCGGTGTTTAGCGTCAGTGGCAGTGATTCGGTG  
TGTTTCAGACGGCCCAGCAAACAACAGCCATAGCCAAATGACGTCAAGCGAAAACGAAAGCATATGCAGGATCGGTAGGTC  
TTACTCCTAGTGCTGCTTAGGAGTAAAAAGTTTCAGTACACATGTTTTCATTTTCCCATAGCACACATACAATTACTATCAT  
GTGTTTTTAACTGCTGCTGCCAGTAGTCCAATGCAAATTGCTGGTCTTAGCCTTCACAACTCAAAGTCAACTAAGTAA  
CCGCTCAAACAGTTAAGGTGCTGCTTCTTTTGGGAAGCATTGAAGCACAACTCTTAACAGAAAATGTTAGCAACGGTCTG  
CA

BPB-0742

TGCAGCCACTGTGTAATGTGATTACAGGCCACATGTTGGCAGTTGGCACCTCCCATTAGTGGGAAGAACTTGAAAAATAA  
CTATGGCCCTTGATTACTCAAGCAAGAATAAAATAAACGTGGCTTTTGATTTGCTACATTGATGTGTTTCAGTAACGTG  
TACGGCTGAAGCCTCGCGCCGTGTTGTTCTTCACTGCCCCAATATGTCTGCACCGCAGTGGCGGACCTAGAATCTCAGC  
TTTGGGGATGCCACAATTACATAATTAACACTAATTATCATTTGTAGTATCAATAAATAGTCTTAAAATAGCATCACTTTGA  
TAACTATTTAGTGTTAAATACAAAAAGAAATATAGTGTACAATTTTATAGGGGGGGCCGCCACTGGATCCGCCCTGCT  
GCACCGTATATGTAAACAAGCGATACTGGGATCTTGAATATGTCACCAATGTTCCAAGACTCAAAGCAGTATATGTAGC  
TAGCGCGGTAAAGTAGCTGAGAGCAAAATGTCTGCTCCAAGCTATAGCATCTGTCTGCTGCATTTAGATGATGAATTAGC  
TCTGTTATTGAGGTGAGCAGGCAACGAGTCAGAAATTGATCTAGTTCCTGCA

BPB-3586

TGCAGACAGATGAAGTTGAAGGTTTCTAACATCTACAAGTACAGAACAACCTGGGGTTGGCAGGAGTAGACATATATGAT  
GTGTATATTTATGCGAGCTTTACATTTGGTCCGTANAAGAAAATTTGGATCTTATACGTGCTGGGGCGTGTGTTGGGTG  
GTGTGGCAGATGTGGCAAGAATGACGTTGCGCCTACCGCGTTCAGAGCGGGAGTTCTCGCGCAACTTTTGACCTGCCGATA

TGGAGGCCCTTGCTTTTCTCCTCCTCCGANNNNNNNNNNNNNNNNNNNNNNNNNNNNNNNNNNNNNNNNNNNNNNNNNNNNNNNNNG  
 AGGTCTAGGTGGAAGTGATCGAAGTAGTNCTCGGCAATGACATTGTCAGNGGTGAGCTCGACACCCATGCAGTAGCCATA  
 GAGGAGGACAAAGATCCATGTCCGGTAGTTGGTAACGACGCCCAAAGGACCTTGGAGAACTTGTCTTGGCCATGTCTC  
 CTTTCTTCTGCA

BPB-4246

TGCAGAAGGCAGTCGCGGANNAGCNGGAGCTNNCCGCCGTCGGTGATGGCCATCTTCGATCAGCAGGACGAGGAGGATGA  
 TCTCAGTGGGATAGACGAAGGCTCTCGAGGGGTGCTAGAANATATCAGNACAGAAATCTTCATAAAGCTTGCTAGCAGTA  
 GATTTGTGGTGATATTTACAATGGGAGTGATGAATACATTGATCTGTACGAGTGTTGGAGTCCCAGTAATATCATTTTTTG  
 AGTATTAAGGTATTATGGACCTCGCACGGGAGGTTTGGACCCGGTTTTTGATTACATGGAGAGGCACACTGATGTTATGGT  
 CAATTATTTTCATGATGATTGCATCCGCGATGAAGCAATATTGGAAGAGTCCAAGGAGATTGCCGCTTATATCGGCATTTC  
 CAGAACCTTACATGAACCATATAATAGTTGAGAAGTGCATCCAGTATGCCGATGCACTCAAACATTGCAGTATGTTCAAT  
 TGGGAGAACTGGGTTTCTAACTACTTTGTATGCGATGGGATTATACAAGGGCAAGGCGATACGTCGGCATGGGAGTAGC  
 CGATGCTGTACAGAGAAACATCTCTACGAAATGGCTTTATTTCTGTAATGATGATGTCATTTCGTCGCCACATGCAGTGCA  
 GGCTTCATGATCACTTGGCTTTGGTGGAGCACAAGAAGGGCCTGCTACCTGATGATATTGGCATGGTGTCTTCTGAGGCA  
 ACATCCTGCTTCATCTTACCAGATTATAACTACTATTANCNATTGGCGACAATCCCAGATTGCATATTCCAACNTTCACA  
 CAGCAGCAAGCTGGGTGTCTTACATCTACGTCGCTGCA

BPB-5027

TGCAGAAGGCAGTCGCGGAGGAGCTGGAGCTTCCGCCGTCGGTGATGGCCATCTTCGATCAGCAGGACGAGGAGGATGAT  
 TTCAGTGGGATAGACGAAGGCTCTCGAGGGGTGCTAGAAGATATCAGAACAGAAATCTTCATAAAGCTTGCTAGCAGTAG  
 ATTTGTGGTGATATTTACAATGGGAGTGATGAATACATTGATCTGTATGAGTGTGGAGTCCAGTAATATCATTTTTGA  
 GTATTAAGGTATTATGGACCTCGCACGGGAGGTTTGGACCCGGTTTTGATTACATGGAGAGCCACACTGATGTTATGGTC  
 AATTATTTTCATGATGATTGCATCCGCGATGAAGCAATATTGGAA

BPB-2058

TGCAGCACAGACTCCGTCGTGCGACCCGGCGGTGGCACCAACCTGTAAGACGACGGACCCCTTACTTGCATTGCATTTGC  
 TTCGTTTATAGATGAATTTCTCATGACCATTGATGTCTATGTTCTCTGTTTTCTGTTGACATGACAAAAAGCACTATCTG  
 TTCTGATGATCTTGTGATCGTCTTGACGATTTTGCAGATGCACAAGGTGTTGCGGATTGCATAGCTGAGTGCAGAAGAG  
 GTGGGGGCAATAATTAACGCCAAGTAACCTTAAATAAACAGCTGGAGAATCTGTGGATCATGGGATCATATGATGCTGA  
 ACGTCTGTCACCGCTGAACCAATCAATAAAATGTGTTCCGCGTGGGTCCGTCGTCGCTGATTTTTTTTTTATTTTTTTT  
 TTTGCAAATCTCAGCTGCATATTTATTTCTGTAAGAAGTTAACACATACTACAAGAATTAAATCATTAGCAATCCCGTCCA  
 AGCCGTCCGTGAATCCCAGTGAAAGCAAGCAACTCATAAGAACAACACACAAGATGGGACGGCATACGCATAAATCTGA  
 TGCGGAATTTCTCCCCGACAGATGCAACACAGAAAACAGTGTGACAGTATGAACAAACACAGCAAGATCAACCGAAAAGTA  
 CTGATTAATACAAGCAAGTCATTATGTCTTCAATCTTCATGTGAATTGGCAAATTTACTACAGCAAACCTCATCCAAGCCT  
 TGCTGATTTGTTAATGAAACGAAACTAATTGAAATTCATCAGTGAGAACCAGATAAACATTACCAAGAATAAACGCAG  
 AAAATGGGGGCTAAATAGAAATCTGGTGCAGAATCTAAGAAAACAATGAAAAGATGAACACATACATAATTAAGGCAAGT  
 AAGATCAATTGAAAGGTACTAACTAATCGAAGCAAGCGAACAAGCCACTTCTGCATCTTGGCCACCGGAACGTAACCTCA  
 GATACCTGCA

BPB-9807

TGCAGCACCTCAATATAAGTGATCATTCGAGTATTGTCTGTCTCCGATTGGAGGCGAGGGCCATGTCAACCAGCTGGTT  
 CCAGTTGAAGAACTCAGCATTTCTAAAAATGGTGCTAACGGGGAAGTATTGACTCAACTACTCTCTCATTTCCCGAAGCT  
 CACCATCCTGCATATAGCTTTTTTGATGAAGGTAGGAGAACTTGGTGTGATGGAGCAGCAAAGTGGATCCCAGAAGCAGC  
 AGACAAAAGAAGAGGAGGAAATAGTGGCGACGGCAGAAGGAGGGGTGCTGCTCTTGCCAACCCAACTACAGATCTTGACC  
 CTCCAACGTTGCCGTCGGGTGAGAATAGTACCCAGTTTCAAGGGGCGACAAGAACGAATCAGCAGGAGGTCTCCAACGTCT  
 ACGCTCCCTCCGCATAGTGAGCGCAGCTTACTGCCCCGAGTTGCTTTTCCCTCCTATTTCGGGCTCCTCGTCTGGTTTTCCCTT  
 TCCCGACCTCCCTTGAAAGACTTAACTATAACAACTGAACAAGTCAATCTGGCCCTCACAAACCTATCCAACCTCCAA  
 GAACTCGAGCTTAGCTACATGGAGTCCCTCGAAAACCTAAGCATCAGCCGTTCCCTCAGAACTGACCATAAATTACTCCTC  
 CGGAGTTCTGTGAGAGTCCATCTGCA

BPB-7995

CATGGCGAAGCATTTCTCTTTCCAGCTATCGCCGGCGTCGCTGCCGCTGCACTGCCCTCCGTTGATGTTCTGAACTGG  
 CCCCAGAAATCGCCGTCCAGCAGCTCCTCGAGGCGCCTCATGCGGATACGCAGTCTACGAAAGGGCGAATTCCAGCACACT  
 GGCGGCCGTTACTAGTGGATCCGAGCTCGGTACCAAGCTTGGCGTAATCATGGTCATAGCTGTTTCTGTGTGAAATTGT  
 TATCCGCTCAA

BPB-4917

TGCAGCTCAAATACATGTTTCGTGTTCTTTCTGTTTGATATCCTGTTACAACCTTCTTGTTCCTTGCTTCTATCGTGGATATG  
TTCAGTTTCATATTTTACTATTTTTAAATGCTATTTTGCATACCCCTCTATTAGATTGCATGACTTGTCTTATCTTTGTTGTAAT  
AGTCATGTTTTATCTATTATTTTTGTAAATTTAAATCATATGATGAATTGCTGATATTTCCAACAATATATGTACACACCT  
CGTCATTTTCATTAGGAAGTGATCCCAGTCTCTAGTATTAAACTATTTTTTACTACATATAGCCATTTAATTATGTTGTGC  
TTTTTAAAGAATCTATACATAACGTACTACTCCCTCTGTTTGGAAATCTTGTGGGAGCAATGGATATATATTTCTGAAC  
AGGAAATACTTGTGGGAGCAATGGATATATATTTCTGGACAGAGGGAGTATATACGAAGTTAGGAACACAACATCTCTA  
TCCCGAAAGTTAATTTAATAGAAATTGTGTCTTGGTTCTTTGGATGCTGATACAACAAGAAGCAAAATTTGGAAGGAGAA  
ACAGTAGAGCCTTAACTCTTATATAAAAAAGGCTTCTTATACTTCCTCTCTATTGAATAAGCGAATTGGTCATGAATCAG  
AATAACACGCCCAAGAATGTACGAGAACCAAATACCAAAAAGTAAATAGGGAGAAAGCATAATTAGAAAATCCATGTTTG  
TGAACTCGGTCTCAAAAGTAAAGACTTTAATGTGTTTCATGTACAGTTACTGCA

BPB-4843

GCTCGGATCCNCTAGTAACGGCCGCCAGTGTGCTGGAATTCGCCCTTCAGTCAAGTTAGATGGTGCAGTAACTGTACATG  
AAACACATTAAAGTCTTTACTTTTTGAGACCGAGTTCACAAACATGGATTTTTTAATTATGCTTTCTCCCTATTTACTTTTT  
ATGTATTTGGTTCTCGTACATTCTTGGGCGTGTATTCTGATTTCATGACCAATTCGCTTATTCAATAGAGAGGAAGTATA  
AGAAGCCTTTTTTATATAAGAGTTAAGGCTCTACTGTTTCTCCTTCCAAATTTTGCTTCTTGTGGTATCAGCATCCAAAG  
AACCAAGACACAATTTCTATTAAATTATCTTTCGGGATAGAGATAGTTGTGTTCCCTAACTTCGTATATACTCCCTCTGTC  
CAGAAATATATATCCATTGCTCCCACAAGTATTTCCCTGTCCAGAAATATATATCCATTGCTCCCACAAGTATTTCCCAAAC  
AGAGGGAGTAGTACGTTATGTATAGATTATTTAAAAAGCACAAACATAAATTAAATGGCTATATGTAGTAAAAAAATAGTTT  
AATACTAGAGACTGGGATCACTTCCTAATGAAATGACGAGGTGTGTGTACATATATTGTTGGAAATACCAACAATTCATC  
ATATGATTTTAATTAAACAAAAATAATAGATAAAACATGACTATTATAACAAAGATAAGACAAGTCATGCAATCTAATAGAG  
GGTATGCAAATAGCATTTAAAAATAGTAAATATGAACTGAACATATCCACGATAGAAGCAAGAACAAGAAGTTGTACCAGG  
ATATCAAAACAGAAAGAACACGAACATGTATTTGAGCTGCACCATCTAACTTGACTGAAGGGCGAATTCTGCAGATATCCA  
TCACACTGGCGGCCGCTCGAGCATGCATCTAGAGGGCCCAA

BPB-14536

BPB-8054

GCTCGAGCGGCCGCCAGTGTGATGGATATCTGCAGAATTCGCCCTTGATGGATCCANTGCAGTTAACAACCTGAATTTTC  
TGATTTCAGAAATCCCTTTTCCCTAGATGAGCATTTCTCTGCTGAGCGGATTTGAGGCGTTGGTGTTCATTTGACCTATAAAC  
TTTGGGATCACCTTGTGGTTCTTGTATTTCTGTCCATGTGCCATGTCAATGTCACCAGACTGACCGAACCTCGAGCACTCC  
GCTGATCCTGATGTGTGCTTTACTGAAACAGAGACCCTTATATCGGATATCTGATTTTGTCTTGTGTTGCTTCTGAAACAGG  
GAGCGCTTACTTTTTCAGCATTTGTTTTACAACCATATGAAGCTGCCCTGACATTTTTCAGTTCGTTTTCTTTTGCAGGCTAG  
TGCTTTCTTGGATGTTCTAACTGTGTGAGTTTCGCATGAGACTGAAGACCAAAAATGTCTGCTGCA

BPB-4405

BPB-4565

TGCAGCAGCACACCAAATAGACAGCCCCGGGCCATGATGAATATATAAACATCATAGCGTGTTAATTAAATGTAAACAACA  
AGCAACATATATATAAGTGATCAACGGAGTATATAGAACTCTGAGACTTGATTTTCTATCTGTCCCGGCTTCTACCCATC  
TCAGTGAGGTGTGAGACAAC TAGTATGGAGGCCCCACGACAGAGTGAATAGTGGACATATATGTTTGAAGTAAAAAAA  
GATGATACTCCCTCCGCCTTAAAATTATTGTCTTTTGATTTGTCTAAATATAAAATGTATCTATTACAAAAAATGGTTGTG  
AGGGCATTGTTGTTGTGCGAATGTTGTGGTTCATCCAAGACTTTATCAGCAATGATACCTCGGGCTCTATATAGTGTATAT  
ATGTGATACCTCGGGCTCTATATAGTGTATATATGTTTTTTTTCTACGTTTGGCCTAGACTTTTTTCAAAGATAATATAGGA  
TTGACAGTAAAAAAAAGTTCCCAAAGCAATACTCCAAAAAAGAAAAAGAAAAATCCAACAATAACTGTTGTAGCTAGCAAG  
AAAAC TTGGGTTCCAAAGGGGCCCAACCGGGTTTCAACCGGTGACCTATTGATCTGCAC TGGNTCC

BPB-8283

TGCAGTCGAACCTCAGGAGTGTAATTTTCAAGGACTTCTGTTATCGACAGCAGATATTGTGTGAATTCACGGTCACACAAT  
ATTTTGGATTCCGAATGATCAAATTTTCTCGTGGGGGGGCGAGATTCTCGATTACCACGGTTACCGAGAAATACCGAATA  
AATTTTCGTACGAATTTATAATGGAATTTTGAATTTCAAATTTTGAAGAACTGTACAAAAGACTTGAACATGAATAGATATGA  
AAAGTGTTAGTAGCTCAGTGGTATGTCTGTACGTGCTCTCTAATTGCTGTAAGATCACGAGTCCGACTCTCATTTGGGT  
AGTTTTCTTTTTTTTTGTAATATAATGGAATTTTGAATTTCAAATTTTGAAGAACTGTACAAAAGACTTGAACATGAATAGAT  
ATGAAAAGTGTTAGTAGCTCAGTGGTATGTCTGTACGTGCTCTCTAATTGCTGTAAGATCACGAGTCCGACTCTCATTT  
GGGTAGTTTTCTTTTTTTTTGTACGTCTTGAAAAAAATAAAAAGTTACTGTCAAAGTGGTTCGAACCTCGAACCTCTTGAGA  
TCGGTGGTAAACGGTTACCACCACCCACAGCTGCA

BPB-3068

CCAGTGTGATGGATATCTGCAGAATTTCGCCCTTGATGNANNACAGTGCAGATGCAAGGCCCTGTCTTAATTTTAAACAGAAAT  
GATCCTGTCTTAGTTTTTAAACAGAAATGATCCATGCTGCTTCTAGCTAGCTAGTAGTTGCCGTGACCTTTTGATGTTGCGT  
CAGAGTGAGTGAGCAACTTGGACTGTAGTTAGTGACAACAACATATGGTTTTGCCCTTAATAGCTAACAGACACTCTCTAC  
CATTACTTAGAAATGAGTGAGTTTCGGGTTGTAATCAGTGCACCAACAATTAGGGTATTTGTCTGTGTTGTTTTTTTGTAGA  
AACAAAGAGGAAATTCATTTACTAATATGCAAAACAAGAGAGTAAATTCATTTACCCAAGACCCAAGAGGCACGACTCTTTC  
TGTGATATACATGATATTACTAGCAGAGATTCTCAAGTTTGATGCAGAATTTCTTCAATGTAGTTATTTTTTACCAAGGTTT  
TGCTCTTCAATTCCCTGCA

BPB-9130

AGTGTGATGGATATCTGCAGAATTTCGCCCTTGACCCAGTGCAGTATGTAGGTGCAGAACTGATTGCATGAATGGACCGCA  
AAGAGATAAAACATGCCGCAAATTTGTTCTGAAGCACAAGAGTAAACAAATTCGACTTCGAAATTCGCTTGTTCGGTTC  
AACAAAAGGAAATATGCATGGAACCATCAAAAGAACTCAACAGGTGCCGCCGAGTGAACAGCAAAAGCACTTATTTA  
TCCAACATACTCCTACACAACCTTGGCTCAAATTCGCGACATCTATCATCAAAGATGCACAGGAAAGATAACAACGAATA  
GTGGTTATATTCATGGAAGAAATTCGTATATGAATCAAGTTTTCTGTATCTATGCAGATATGAATGAAAGAATTCCAGAT  
ATCAATCTGTTTGGAGGTCGACAAAAATTCGTACACCAAAGATCTCCATCCAATCTACTCTAAGATTATCTGTCTGTTGT  
ATCATCCGCTGGCTCTCTTTGGCATGGATGTGCTGAGCTTCACCTCCAGACTCCAGAGTCTCGGGTGATAGTGTAGCTCC  
TCTGCGCTACATCATGGTGATGTCTGTGAAATGAAACAGCAAATTAATCCAATTAGTGACAATATCACAGCCATTAAC  
TGATTAAGATTTCGAAGGATGCAGGTACGGATAACAAGAACAATCAAAGGCTGCA

BPB-6607

TGCAGCCCCGAGGATACGGGAGCTCGAGCTCCTCCTCCGGCAGCCCCCTCATCCGAGCAGCCACCAGCGCCGCCGCATC  
CAACCTCCAAGGTCGGCCCGTCGGCCCTATCCTTGCCCTGACCTCTCTGCTTTCCCTCATCCTCACCTCGTTTCTCTCTC  
TCTCTCTCCTAGACACAGAACGTCGTGGTCTGTTCGGCAGCAGCCTCCGCCCGAGCCAGCAGTTGCATCCTCTCTGTGC  
ATCGCCCTCGCTGTTGTTTCGCCCTGCATCGGTGCGGCCAGCGACCTCAGCCGACGGAGCAGCGAAACCCCTCTTCCCTGCC  
CTCTCTCCTTCTTATTCCTTCCCCAAAATTTCCCTCTCTGAAGACTCTGTTTGTCTTGTCTTCTTCAGCCAACAGCAGAA  
TCGATGCCAACTCCTGCTGCCCTCCATCGGCGACGTACGTGCCGATCTCGCCGGTGAGACCCCGCTCCCTCATGTCCCC  
GTTTCTCCCCCTTCTTCTCTCTTAACCTCACATGCTCTCCCTATCTTTCTGCA

BPB-4125

BPB-6357

TGCAGGAGCGAACCAGCGCCGACCGAAGCGCTCGGTGGATGCGGACGGGGCGAGGTGAGCCATCGCGACCGCGGTAAAGT  
CGGCGTGTGGAGGCGACGATGCGATGACAACCTTGAGGAGGAGCACCCGAGGGCCGCGTAGCGGAGGCATGGAGTGGTG  
CCAGCCAATGGTGAGGTTTCAGCGGCGGGCCAGCTTGCGGAGCGTGCGGAGCCAGTGCGGCGCATAGGCGAGCTCGGAGAA  
GCGTCCGCGACAGGCGAGGCGCTGTGGAGGCGGAGTTGGCGGCTCGGACGCACGGCGTTGACTCCGTAATTGACCCGATAT  
GTGGCCCCCTTTTATTTTATTTATGTCAGGAACCTTACCCCGGACGGGAGTTGATATTTTGGGTGGATCATAATACTGCA

BPB-7786

TGCAGTTATCTATCTATATATCTGGTTATTACCACAACCAGAGACCTTTTTTTTTTATGAGGCAAACCACAACCAGAGACC  
TTGTACAGTGCATGACAGACTTTTCACTACAAGAAGGCTTTTATTTTATTTAAATTCCTCGGCTATACCGCGCCAAACTG  
TGTCTGTCTTCCAAGTCTCCAGCCAGCCTCTCCAGCCCTCATGGAGCTGCATCCTCCTCAGCGACATTGAACCTCGCCGT  
GATCGGCACCCCCCGCAAGAGCAGCCATGCTGCCCTCAGTGACGTTGAACCTCGCCGTGATCGGCACCCCCGGCAGGAAC  
AGCCATGCTGCCCTCAGTGACGTTGAACCTGCCGTGATCGGCACCCCTCTGCA

BPB-1933

TGCAGTGGGAATACTAGATGAAACCGTCAGGCCAAATCCAGCATGGTCTACAACGAGCAGGAAACCGTCGGGCCAAATCC  
AGCAAGGTCTACAACGAGCAGGCCACCGAAGATAGGTACGGGTCTGCTGAAGGATGACGAGAATCGCGCCAAGAACCGC  
GGCCGCTGCCTTACACGGAACGTGCGTCTGAGCCGATTGTGTACCGTCTGAGGTTTGGGAAATGCGGATCCCCCAGAAG  
GATTTTCGGAAGAAGGTTCCTTTTTGTGAGCCCTGAACAGCCAGCCGATGTGGGACTCGCAGGCAGCACACAGCGCAACCGT  
CCACGTATATCTGCA

BPB-1176

TGCAGGTGCTATTTTATAGCTGGAACTTATTTTTCGTATTCTTCATTCTAGTGAAGAAATGGATCAAAAGATGTTTCATAC  
AGGGCAACAAGCAAGAGAATTAATTCGATTAGTTTCACTGTGATTATGATAATTTTACTAATTTCAAATGAAAACCTTGCTAAACATA  
AACATATCACAAATTAGCTCAGTTAGTTTCACTGTGATTATGATAATTTTACTAATTTCAAATGAAAACCTTGCTAAACATA  
ACACAACTTTTTTTTTAAAGAGCTTTGGAATCTGTATCTGAGCACACGGATGACAATCTTTGAGCTCACAGCTCAAAGAAG



ATGTAGCATTCAGCTCCTGCA

BPB-0649

BPB-1029

TGCAGCTGTCTAGAAGAGGGTAGTAGGGCCACGCTGTCTGAACACAATCAAAGCATGCAGTCAAAATTATGTTAAAAACAAT  
AAATACTCTTCATAGAACATGACATTCTGATAATGAGCACCAACCAAGTTCAGCATTTGTAGCCACTGAGTACCAAGCTGC  
CAATCGATGCAGCACCAAGGCCTGATCCATTGCTTGGTCTGAATCCCCAAACCTTAATGCTGTGGACTTAACACCTACT  
TTGAGGTCATCTTCTTTGTCTGACATGTATTGGGATACCACCATAATGAAAAACGATAATCCTGATAAGATGCTTTTCC  
TCAGTTTAGATATGAAAGAACCACCTAGTAAAATACCTGATGTGCATATATGGTATCGTACACCAATGTCCAACATATA  
CCGGCAGTATATAGTGAAGGATGACTGCA

BPB-8382

TGCAGGTATATTTATATCCAGATCAGTTTCATTTTGATCACAAACCATCTTGATATAGCTCTGCAAGCAAACATATGTCAG  
TTGTTAACGCCAAAAACACGTGTTGAAATATAAGGCATGAGCCAAAAGTGTGCTCTTCTAAATACGCAGACATGCACCAC  
CAAATGTGTACACACAACCTATGAAAAACAATTGTCCAATAAATAATCAAAGGCTTAAGTAAGGTTGTGATGGTCATTCT  
AGTGGTAAAAAATGGTAATATACGTTGTCTCAGGCAACCTTGCTTGTGATCTCATTTAACTGTATCCCAACATCTTATCTT  
CTAATTAATACCAGTTGAGAAAGGTCATACATGGAACCATTTGCCGTGTTGAATTTTATGAGACAGATCATATAGCACAT  
ACCATGCCGATTATTCAGGATTACAATAGCAGAAGCACCAGCATCTTCAGCAACCTTAGCTTTTGTAGTGAACCTTACAAT  
CTCCTCTTTGCACTAGCAAACTTCTCCAGCAACCTAAATAAAAAGAACATTAATCACTACTTCTCTGTACCTAAATAA  
ATGTAGTTGGGGAGAACTAGTCTAGTTCTCCCAACTACAATTATTTAGGCACAGATGGAATACATAACAATGTAGGATA  
CTATAAAAAATTTGCAAAACAGCTAAATCATGTTTTCCAGAAAAGGTAACCTTTTCTTTGAGAGGGGTACAACAATCAAAA  
GGGTCTGCTAATAGTAGTCTCTGTCGGTTTCGCGTGCTTTTCTTTGACTCTATTATGGGGCCAAACCGAGCACCAACACC  
AACAACTCATCGGTCTCTGTTTTGACCCAGTTTCGCACCTTTACCTGATAAAAAGGTGAGGAAACAAAATTTGAGA  
ATGAGTACATAGTCCATTAAAAAGAAAGTAGTAGATGCTGAAGTACAAAATCTCCGCCGGAGAAAAAGGAAGAGCTGCA

BPB-6875

TGCAGCTCTTCCTTTTTTCTCCGGCGGAGATTTTGACTTCAGCATCTACTTACTTCTTTTTTAATGGACTATGTACTCAT  
TCTCAAATTTTGTTCCTCACCTTTTTATCAGGTAAAGGTGCAAACCTTGGGTCAAAAACAGAGAGACCGATGAGTTTGT  
GGTGTGGTGCTCGGTTTGGCCCCATAATAGAGTCAAAGGAAAAGCACGCGAACCGGACAGGACTACTATTAGCAGACCC  
TTTTGATTGTTGTACCCCTCTCAAAGAAAAGGTTACCTTTCTGGGAAAACATGATTTAGCTGTTTGCAGAAATTTTTATAG  
TATCCTACATTGTTATGTATTCATCTGTGCCATAATANNGTAGTTGGGGAGAACTAGACTAGTTCTCCCAACTACAT  
TTATTTAGGTACAGAGGAAGTAGTGATTAATTGTTCTTTTATTTAGGTGCTGGAGAAAGTTTGTCTAGNGCAAAGAGGAG  
ATTGTAAGTTCACACANAAGCTAAGGTGCTGAAGANGNNGNGCTTCTGCTATTGTAATCCTG

BPB-7644

TGCAGTTTTTCAGCATCCACATGATCACACCGAGAATCTTCTGTCAACAAGATACAGTACACTCTGGGGTGGTTTTAGAT  
CGTGACAAGGATGACAATGTCTGATCACTGGATAGTATCTTGCAAATTCAGCAAAATCTCCGCTGGTAAAAATGAGGAGGGA  
GGATTTTACATATTAACCATCTGATATAATACAGTACTATGAGGACCGGGCGCTTTGCTATGCCCTCTGATTA AAAAAGA  
CTAATCACTCTTTTTAAAAACAACATGTATTACTTTGTTAAAAATGGCAAACCTTTTAAATTTAATCAAATTTGTAGATAA  
ATATGTCAAATTAATAATATCAAATCTCGTGATTAGATTCATCGTTAAATGAATTATCATACTTTTTTTATTTAATATT  
ATGGATGTCGATATTTTTACTCTCAACTTGGTCAAAGTTGAAGAACGTTGAAAAGATGTTGTAGAGCTCAAGCTAGCTGC  
A

BPB-0443

TGCAGCTAGCTTGAGCTCTACAACATCTTTTCAACGTTCTTCAACTTTGACCAAGTTGAGAGTAAAAATATCGACATCCA  
TAATATTAATAAAAAAGTATGATAATTCATTTAACGATGAATCTAATCACGAGAATTTGATATTTAATTTTGACATA  
TTTATCTACAAATTTGATTAAATTTAAAGGTTTGGCATTTTAACAAAGTAATACATGTTGTATTTTAAAGAGTGATT  
GTCTTTTTTAAATCAGAGGGCATAGCAAAGCGCCCGTCTTATAGTACTGTATTATATCAGATGGTTAATATGTAAATC  
CTTCTCTCTCATTTTACCAGCGGAGATTTTGTCTGAATTTGCAAGATACCTATCCAGTGATCGACATTGTCATCCTTGTCTAC  
GATCTAAAACCACCCAGAGTGACTGTATCTTGTGACAGGAAGATTCTCGGTGTGATCATGTGGATGCTGAAAACCTGC  
A

BPB-6677

TGCAGATCAATAGGTCACCGGTTCTGAACCCGGTTGGGGCCCTTTTTTAAACCCAATTTTTCTTGCTAGCTACAACAGTTAT  
TGTTGGATTTTTCTTTCTTTTTTGGAGTATTGTTTTGGGAACTTTTTTTTTACTGTCAATCCTATATTATCTTTGAAAA  
GTCTAGGCCAAACGTAAAAAAAACATATATACACTATATAAAGCCCGAGGTATCACATATATACACTATATAGAGCCCG



AGGTATCATTGCTGATAAAGTCTTGGATGAACCACAACATTCGACAACAACAATCCGGTTTGAAAGACCATTTTTTGTGA  
CTCCTCCAAATGCCGTCACAACACCATACTGTCAATCCTATATTATCTTTGAAAAAGTCTAGGCCAAACGTAGAAAAA  
AATATATACACTATATAAAGCCCCGAGGTATCACATATATACACTATATAGAGCCCCGAGGTATCATTTGCTGATAAAGTCTT  
GGATGAACCACAACATTCGACAACAACAATCCGGTTGCAAAGACCATTTTTTGTGACTCGTCCAAATGCCGTCACAACAC  
CATTTTTTGTGACTCGTCCAAATGCCCTCACAAACATTTTTTGTGACTAGATACATTTATATTTAGACAAATCAAAGATA  
ATAATTTTAAAGGTGGAGGAAGTATCATCTTTTTTTTACTTCAAACATATATGTCCACTATTCACTCTGTCTGGGGGCCCT  
CCATACTAGTTGTCTCACACCTCACTGAGATGGGTAGAAAGCCGGGACAGATAGAAAAATCAAGTCTCAGAGTTCATATAC  
TCCGTTGATCACTTATATATATATGTTGCTTGTGTACATTTAATTAACACGCTATGATGTTTATATATTCATCATGGCC  
CGGGCTGTCTATTTGGTGTGCTGCTGCA

BPB-2940

BPB-2863

TGCAGCAGCACACCAAATAGACAGCCCCGGGCCATGATGAATATATAAACATCATAGCGTGTTAATTAAATGTAAACAACA  
AGCAACATATATATAAGTGATCAACGGAGTATATAGAAGTCTGAGACTTGATTTTCTATCTGCCCCGGCTTCTACCCATC  
TCAGTGAGGTGTGAGACAAC TAGTATGGAGGCCCCACGACAGAGTGAATAGTGGACATATATGTTTGAAGTAAAAAAA  
GATGATACTCCCTCCGCCTTAAAATTATTGTCTTTGATTTGTCTAAATATAAATGTATCTATTACAAAAAATGGTTGTG  
AGGGCATTGTTGTTGTGCAATGTTGTGGTTCATCCAAGACTTTATCAGCAATGATACCTCGGGCTCTATATAGTGTATAT  
ATGTGATACCTCGGGCTCTATATAGTGTATATATGTTTTTTTCTACGTTTGGCCTAGACTTTTTTCAAAGATAATATAGGA  
TTGACAGTAAAAAAAAGTTCCCAAAGCAATACTCCAAAAAAGAAAAAGAAAAATCCAACAATAACTGTTGTAGCTAGCAAG  
AAAAC TTGGGTTCAAAAAGGGCCCAACCGGGTTCGAACCGGTGACCTATTGATCTGCA

BPB-4626

TGCAGTGTCCCTTCTTCAGAGGTGGCCAAACGGGGCCAGCCCGACAAGGCACGATACACGTTAATCGTGCTTGGCATGAACC  
GATACATGAGGTTACGGTTAGTAAACGGGTTATGCTATACCGCCCCGTGTGGTGCGCCTGTTAGCCTAGGCACGAGCCCT  
TGGCTAATCGGACCGCCAGTAGGCACGGCTGGGCTGCATATTCTCGGTATGCTAAGCCTTTTAGTGTGTGACAGCTGAAA  
AATCCTATCTGACGCCCTCGGGCGTTGAAAGGATGTGGCTTCGCTGAAGCGTGGCCACCCGACGCCACAGTTTGGGCCGG  
GCCATGGTGCCTCTGCCTTTTCTTTCTTTTGTTCAGATATATTTTGAAGTATGTTGAATGTGCATTTAAATATCGTTC  
AGCATATATGTGTACTTAAATATTGCGAGTTTCGAGTTCGGTTCGCCCCGCTAGCGCTCTTCGGCGAATGGCCTACCTTGCC  
ATTTAGCCGGTGCCGTGTGTTGAGTGGGTGCTAACGGGCCAGCCCGCCGGTTTGGCCTTCTTCTTCTCCTCCTCCTCCT  
TCTTTTGGATCTGCTATATATAAAAAAACTGAGGCATAGGAGCAGAGGATTGCAGTGCACGTGCCAGCATTC AATGGACC  
TCACACCCACACCCAGACGGTCACGGGCACACACATGATGGAATGGAAGGAAGTGCCTACGTAGATTTGGATTTGGA  
TTTGGATTTCAATTTAGATTTGGATATAGGGCGGTACGAATTGCATTCCCTTATTGTTTATTGATTTGATTTGATTAAAGCA  
AGCAAGCAAGCATCTCTCCCGTCACTACTTACTGTACTTACTTACTACTAGTATAATGTTAGAAACGAGATTAAGCGTGG  
TATGGATGGATGAACCATGAACCAACACTTGGCTTGGCTGCA

BPB-9817

TGCAGGTACAAGAGATTGGAGGTCTCGCCGCCCTTCACCAATGCCGTAAGCGTCGCAACCTGCCTTTTTAACATCCTTTGT  
TTGCATATATACAATTTTACGGTGGCAAATCATGTATGTACAGAAGCAGCAATAACCAAGTAGCAGTGCCGCCAAGTCCA  
CCTTACATGTGTCAAACACAACGTGCCCTGTTTTCTCCACGATACCGATGTGCAATAGAAACAAGACAGTGCAAGCACC  
ATGCTATGATAAAAAACATATGCTTCAATTGCAAGGCAGCACAAACCAACACTTGTTTTTATCTTCTTATGTATGATTTTC  
TATGTGCCAAACTAAGCTAGCAACAACAGCTAGATTTTCTTGTAGCACAAACTGGAACAGTCTGTTGATGCCTTTACAT  
TACATACCAAGTGACCTTTTGGATCATTTGTTTAATTTCTTTTATACCTTGGTGGCACACTTTCTGGCCTTTCTATCTTTTT  
TTGTCTTAACGTTTTTGACCACCTCCATATGGTTGTTTATGTAGACAGCTGTTCCCTGCTGTTCCCTGTCTTTCTCCTTTGGC  
TGTTGAAGCGCTGCATTCATTTATGCAGGATGAATCCGAGCACAAAGTAAGCGCCATTTATGTATGCTCACAGATGGCTCT  
GTTCAAATAAATCTTTTTCTATGTTGGTTGTTGAATGTGTTTACCTTAGGAGGAAACAAAGGAGATCGGATGTGAAAAATC  
CAGTCACTGTAATGCGTTATGTTGCATCGTACTAGTATGATAAGTATGTGTTGGTTCAGTCCATTGTGGGTAAC TAAATT  
GTCTTCTCAGAGGAAACTGCTTAAAAAGAAAGATAAATGCATCTACAGTTTGTAGTCAGTGTACACCGCAATTGATCAT  
CTGCTGTCCAACCTCTGTGACATTATTTTCTTGAGAAACCGAGAATTGTTTTGGTCAACTTTTATTTCCATGCATCTACTG  
CCTCTTTTTCATCAGCCATGGCCTATCAATCTAAACTCTTTGCTAGCCTAATATTTTCTTGCTCTTAAAAAATTATCTTT  
CAGGCATTACCTCATTGTTTCTGCA

BPB-9890

TGCAGGTACAAGAGATTGGAGGTCTCGCCGCCCTTCACCAATGCCGTAAGCGTCGCAACCTGCCTTTTTAACATCCTTTGT  
TTGCATATATACAATTTTACGGTGGCAAATCATGTAAGTACAGAAGCAGCAATAACCAAGTAGCAGTGCCGCCAAGTCCA  
CCTTACATGTGTCAAACACAACGTGCCCTGTTTTCTCCACGATACCGATGTGCAATAGAAACAAGACAGTGCAAGCACC  
ATGCTATGATAAAAAACATATGCTTCAATTGCAAGGCAGCACAAACCAACACTTGTTTTTATCTTCTTATGTATGATTTTC  
TATGTGCCAAACTAAGCTAGCAACAACAGCTAGATTTTCTTGTAGCACAGAACTGGAACAGTCTGTTGATGCCTTTACAT  
TACATACCAAGTGACCTTTTGGATCATTTGTTTAATTTCTTTTATACCTTGGTGGCACACTTTCTGGCCTTTCTATCTTTTT

TTGTCCTAACGTTTTGACCACCCTCCATATGGTTGTTTATGTAGACAGCTGTTCCCTGCTGTTCCCTGTCTTTCTCCTTGGC  
 TGTGAAGCGCTGCATTCATTTATGCAGGATGAATCCGAGCACAAAGTAAGCGCCATTTATGTATGCTCACAGATGGCTCT  
 GTTCAAATAAATCTTTTCTATGTTGGTTGTTGAATGTGTTTACCTTAGGAGGAAACAAAGGAGATCGGATGTGAAAAATC  
 CAGTCACTGTAATGCGTTATGTTGCATCGTACTAGTATGATAAGTATGTGTTGGTTCAGTCCATTGTGGGTAACTAAAT  
 GTCTTCTCAGAGGAACTGCTTAAAAAGAAAGATAAATGCATCTACAGTTTGTAGTCAGTGTACACCGCAATTGATCAT  
 CTGCTGTCCAACCTCTGTGACATTATTTTCCCTGAGAAACCGAGAATTGTTTGGTCAACTTTTATTTCCATGCATCTACTG  
 CCTCTTTTTCATCAGCCATGGCCTATCAATCTAAACTCTTTGCTAGCCTAATATTTTCCCTGCTCTTAAAAAATATCTTTC  
 AGGCATTACCTCATTTGTTTCTGCA

BPB-2410

TGCAGGTACAAGAGATTGGAGGTCTCGCCGCCTTCACCAATGCCGTAAGCGTCGCAACCTGCCTTTTAAACATCCTTTGT  
 TTGCATATATACAATTTTACGGTGGCAAATCATGTATGTACAGAAGCAGCAATAACCAAGTAGCAGTGCCGCCAAGTCCA  
 CCTTACATGTGTCAAACACAACCTGTCCCTGTTTTCTCCACGATACCGATGTGCAATAGAAACAAGACAGTGCAAGCACC  
 ATGCTATGATAAAAAACATATGCTTCAATTGCAAGGCAGCACAAACCAACACTTGTTTTTATCTTCTTATGTATGATTTTC  
 TATGTGCCAAACTAAGCTAGCAACAACAGCTAGATTTTCTTGTAGCACAAAACCTGGAACAGTCTGTTGATGCCTTTACAT  
 TACATACCAAGTGACCTTTTGGATCATTGTTTAAATTTCTTTTATACCTGGTGGCACACTTTCTGGCCTTTCTATCTTTTT  
 TTGTCCTAACGTTTTGACCACCCTCCATATGGTTGTTTATGTAGACAGCTGTTCCCTGCTGTTCCCTGTCTTTCTCCTTGGC  
 TGTGAAGCGCTGCATTCATTTATGCAGGATGAATCCGAGCACAAAGTAAGCGCCATTTATGTATGCTCACAGATGGCTCT  
 GTTCAAATAAATCTTTTCTATGTTGGTTGTTGAATGTGTTTACCTTAGGAGGAAACAAAGGAGATCGGATGTGAAAAATC  
 CAGTCACTGTAATGCGTTATGTTGCATCGTACTAGTATGATAAGTATGTGTTGGTTCAGTCCATTGTGGGTAACTAAAT  
 GTCTTCTCAGAGGAACTGCTTAAAAGGAAAGATAAATGCATCTACAGTTTGTAGTCAGTGTACACCGCAATTGATCAT  
 CTGCTGTCCAACCTCTGTGACATTATTTTCCCTGAGAAACCGAGAATTGTTTGGTCAACTTTTATTTCCATGCATCTACTG  
 CCTCTTTTTCATCAGCCATGGCCTATCAATCTAAACTCTTTGCTAGCCTAATATTTTCCCTGCTCTTAAAAAATATCTTT  
 CAGGCATTACCTCATTTGTTTCTGCA

## CHR. 7H

BPB-0427

GGANCAAAAATGTAATGTGGAGCTCGAACCAGGTTGAGAATACGAAATATTCACACATACTCCGTGTGCCGTTCAAGACA  
 GAAGACGGAAAGGATTTGCGCCAGTGGGTGTCCCGTTTACATTTACCTTAGAGAGATACACTCAGGTTTGCCA  
 GCTGCGAATTATTAACAATCAGTACTCTTGTGTGAGTGATCTTGAGTAAAAAATTATCCCGATATGATTTCAAGATGCTT  
 CTGCCAAGATCCTTGACATTCTAGAGGGCAAACCAGACTTGATCATTTGGCAACTACACTGACGGAACTTGGTGGCGTCC  
 CTCATGTCAAGCAAGCTAGGAGTCACACAGGTTAAAAAATGTCTTCTAATCAAATAAAAGCCCTCAAGATTTCTTTTAC  
 CACCAATCACAGTTGACATGACATCCCTAAGTGGTCTTCCCTGACAGGGAACAATTGCACATGCTCTCGAGAAGACGAAGT  
 ATGAGAACTCAGATGCTAAGTGGAGAGAGCTGGACCAAAAATACCCTTCTCCTGCCAATTCACCTGCACTGGATCCNTCN  
 AGGNCNAATTCGTCANANNTCCNTCNNNTTGCNGGCNGCTCGAGCATGCATCTAGAGGGCCCAATTCGCCCTATAGTG  
 AGTC

BPB-0108

TGCAGGTCGGAATCTATGAAAGCCTTCATAGCACGGAGGACGACGAAGTGGATTGGAAGTGGAGGAGAGCCGACGAGGAA  
 ACTGAGGGAGTCTCCCTTGTTTACACGTTACACGTTACACGTTTGGGAACACTAATTCACATGGGCACCTTGATCATTTG  
 CAAATTTACATTACAATGATGTATTGTGAATATGCCGAAGATAGGCGTGGGTAGGGAACTGAATCAGAAGGACGGCCAT  
 ACATATGGAGCAAAATGAATGAATCTACACTCTAAAATATGTCTATATACATCCGTGTGTAGTTCGTAGTAGAATCTTTT  
 AAAAGACTTATATTTAGGAACGGAGAGAGTAGATAGCAAGCTTTATATATGTAGCTGACAAGCTCATGTAGAATTCAGTA  
 CGGTACGAATAGATATCAAGCTTTATATGTATCCAGCTGGAAGCACGCGTCCGTCCAACGTGTCACCTCAGCCTCGCCCGG  
 CTACCTCTATTCCTCTCTGGCATAGCTGATTGTAAGCCCCCTCCTCTGCTCCCTCTGATGGTAAACTCTGAACTTGGTTGC  
 TTGCTTACTTTCTGCA

BPB-9729

BPB-8921

TGCAGCAGCTTCACAATATTTGATTTGGACTGGATAAATGTCTCTTTCTCATCAAAAACAATGGCGAAAGGTTTCAATA  
 AAAACAGTTCTTCGCGAGAACGGTCGTGCTGCATTCACCATCGGCGGCAACCTCCATCCTTGCGGAATCGGCAAAGGCA  
 GAGGAACACGAAGCATGTATGCCACCGTCAGATCTGTAGAGACCATGAATGGCAATCAGACTTGTAACGGGAATTCGTG  
 CCACAGCCTTGTACTAACGCCCCAACAAATCAAGATCAAATAGCTTAACTGACAAATCGACTGAGCCTCATGTGTGCCCTG  
 TTTTCCCTGCATAAATAAATAAATAAATACTGAAATCGTTTAACTGACACTGTTACCCAATCTGAAGCCACGAAAGAAGTG

GATCAGAATCGGCGGATGATAACATCGGATGTACCTGCA

BPB-2216

TGCAGTGGTGTGTTTTCAAATCTGCTAGAAATCATCAATGGCTGTCTTTTTCAAAAAAGGACAGTAACGATTTCTCCTGCGC  
TCGCTAATCCGCCATCTGCGTGCGTTGCATGCAGCCTGTTAGGAGCTCCTAATTAGATGTATGCAAAAAAATGATGTCA  
GTGGATTCTTTTTAAAAATTGAAAATTAAAAATGTTTTGTAGCTTAAACTATCCACTCGATTGAAAAACTGTTTTACAT  
AAAAGATTCTTCATCACGAGACCTTCAAATTTATATCGCGTTTTGATAAAATTTCAACGACATTTTAAAAAGATTATAACA  
TCTAAACTACGTAACCTATCACACCTATAACACATAAAATTATCATGGTTTTTACAGTGAGGCTATTGGGTATATTTTAAC  
CTTTTTTGTCTAAGTCAAAATATAACCACATGATTCGTAAGTAAATTATTAGGTCCGCAATTCCACCGTCCATCATCGATG  
TCATGCCCTAGCCGCAAGGTGAGGTTACATGCCGATGTTGTATGGCCCGCTCATAAACATGACTTTGTGAGTCGTGCTTT  
GCTAGGTTTCGTTTAGGCATGTGCCGGGTGTGATTATTGTACATGCATTATCTGCA

BPB-2875

BPB-0043

TGCAGTGGTGTGTTTTCAAATCTGCTAGAAATCATCAATGGCTGTCTTTTTCAAAAAAGGACAGTAACGATTTCTCCTGCGC  
TCGCTAATCCGCCATCTGCGTGCGTTGCATGCAGCCTGTTAGGAGCTCCTAATTAGATGTATGCAAAAAAATGATGTCA  
GTGGATTCTTTTTAAAAATTGAAAATTAAAAATGTTTTGTAGCTTAAACTATCCACTCGATTGAAAAACTGTTTTACAT  
AAAAGATTCTTCATCACGAGACCTTCAAATTTATATCGCGTTTTGATAAAATTTCAACGACATTTTAAAAAGATTATAACA  
TCTAAACTACGTAACCTATCACACCTATAACACATAAAATTATCATGGTTTTTACAGTGAGGCTATTGGGTATATTTTAAC  
CTTTTTTGTCTAAGTCAAAATATAACCACATGATTCGTAAGTAAATTATTAGGTCCGCAATTCCACCGTCCATCATCGATG  
TCATGCCCTAGCCGCAAGGTGAGGTTACATGCCGATGTTGTATGGCCCGCTCATAAACATGACTTTGTGAGTCGTGCTTT  
GCTAGGTTTCGTTTAGGCATGTGCCGGGTGTGATTATTGTACATGCATTATCTGCACTGNNNTCCATCAAGGGCGAATTC  
CAGCACACTGGCGGCCGTTACTA

BPB-5259

TGCAGCATCTTGATCTCTCATGTCAATTTTTACAGAGAAGGAATGTACTCAAGAGACATTTTCATGGGTAGCGCGCATTCCT  
AATTTGCAGTCTCTTGGAATGAATGGGGTAAACCTCAGCACGGTAGTTGATTGGCCTTATGTTATCAATATGATCCCTTC  
CTTGAAGGCCCTCAGTCTCCAGTCTTGCTCTCTTCCAACCGCAAATCAATCACTCCCACATATTAATAACCTTACCGAAC  
TGGAGAGGCTTGATCTCTCTGGCAACATCTTTGCCACCCAATGTCAAGGGGTGGTTTTGGAATTTGACAGGCCCTCCAG  
CATCTTTACCTTGCCGGCACTCTACTGTACGGTCAAGCACCTGATGCACTGGCACGTATGACGTCCCTTCAAGTCCTTGA  
TTTGTGAGGTAATCGTGACATGGGGATGATGAGTAGTACAAGCTTAAAGCACCTATGCAGTCTGAAAATTCTGGACCTTT  
CTTTTTGTCAAATTGATGGAAATATAAAGGATATTATAGGGAGGATGCCCCAGTGTCCATTGAACAGACTGCANNGGATC  
CA

BPB-6976

BPB-3418

TGCAGAAAGTAAGCAAGCAACCAAGTTCAGAGTTTACCATCAGAGGGAGCAGAGGAGGGGCTTACAATCAGCTATGCCAG  
AGAGGAATAGAGGTAGCCGGGCGAGGCTGAGGTGACAGTTGGACGGACGCGTGCTTCCAGCTGGATACATATAAAGCTTG  
ATATCTATTCGTACCGTACTGAATTCTACATGAGCTTGTGAGCTACATATATAAAGCTTGCTATCTACTCTCTCCGTTC  
TAAATATAAGTCTTTTTAAAAAGATTCTACTACGAACCTACACACGGATGTATATAGACATATTTTAGAGTGTAGATTCAATC  
ATTTTGTCTCCATATGTTATGGCCGTCTTCTGATTCAGTTTCCCTACCCACGCCATCTTCGGCATATTCACAATACATCA  
TTGTAAATGTAAATTTGCAAATGATCAAAGTGCCCATGTGAATTAGTGTTCCCAAACGTGTAACGTGTAACGTGTAAACAA  
GGGAGACTCCCTCAGTTTCTCTCGTTCGTTCTCTCCACTTCCAATCCACTTCGTGTCCTCCGTGCTATGAAGGCTTTCA  
TAGATTCCGACCTGCA

BPB-24334

BPB-3461

CGGATAACAAATTCACACAGGNAACAGNTTATGNNCNTGATTGCGCCAAGCTTGGTGCNGAGGTTGGATCCACTAGTAAC  
GGCCGCCAGTGTGCTGGAATTCGCCCTTGAGGGATCCAGTGCAGCATCTTGATCTCTCATGTCAATTTTTACAGAGAAGGA  
ATGTACTCAAGAGACATTTTCATGGGTAGCGCGCATTCCTAATTTGCAGTCTCTTGGAATGAATGGGGTAAACCTCAGCAC  
GGTAGTTGATTGGCCTTATGTTATCAATATGATCCCTTCCCTTGAAGGCCCTCAGTCTCCAGTCTTGCTCTCTTCCAACCG  
CAAATCAATCACTCCCACATATTAATAACCTTACCGAACTGGAGAGGCTTGATCTCTCTGGCAACATCTTTGCCACCCA  
ATGTCAAGGGGTGGTTTTGGAATTTGACAGGCCCTCAGCATCTTTACCTTGCCGGCACTCTACTGTACGGTCAAGCACC  
TGATGCACTGGCACGTATGACGTCCCTTCAAGTCCTTGATTTGTGAGGTAATCGTGACATGGGGATGATGAGTAGTACAA  
GCTTAAAGCACCTATGCAGTCTGAAAATTCTGGACCTCTCTTTTTGTCAAATTGATGGAAATATAAAGGATATTATAGGG  
AGGATGCCCCAGTGTCCATTGAACAGACTGCA

BPB-4808

TGCTCGAGCGGCCGCCAGTGTGATGGATATCTGCAGAATTCCGCCCTTGTAGACTGCGTATCCGGATCTCGGCTTGCTTGG  
AAGGTTGCCGGCCCTTCATACTCTGCTGTTAAAGAGCCTCCGCCATG

BPB-1285

CATGTATAATCAGCCCTCCTTCAAGCTGTGTCAATGCCCAAGTTCTGTCAAGTTCAAATCCCATGAGGGAGAGGACAGAA  
AGGGAGGAGGGAGGACGCACGGGGGACTGATCCGGATACGCAGTCTACGAAGGGCGAATTCCAGCACACTGGCGGCAATT  
ACTAGTGGATCCGAGCTCGGTACCAAGCTTGGCGTAATCATGGTCATAGCTGTTTCTGTGTGAAATTGTTATCCGCTCA  
ANNT

BPB-4552

TGCAGCATACTCAACAAAATGTATTACTTATTCAGTCTTCACAGGCCGGCTTTATACCAAAAGATACCACTACTTGTAGC  
ATCTGTATGTGCATGGTGTGGCAATGTCTTTTGCTCAATGTCTTCGGTCACATCTATGGTGTGCAATCTTTTGTCTAAA  
CAACATGCCATATGCTTGTGCTTTCCAGCTGTCGTGTTGCTACAAATTTTGAAGGACGACTACAAGAACTACACTCAA  
TTGATGCAACCGCTCTTTATAGAATTGCGCTATCATCGGATCCCGATGCGGTGTTTAGCGTCAGTGGCAGTGATTCCGTG  
TGTTTCAGACGGCCAGCAAACAACAGCCATAGCCAAATGACGTCAAGCGAAAACGAAAGCATATGCAGGATCCGTTAGGTC  
TTACTCCTAGTGTGCTTAGGAGTAAAAAGTTCAGTACACATGTTTTCATTTTCCCATAGCACACATACAATTACTATCAT  
GTGTTTTTAACCTGCTGCTGCCAGTAGTCCAATGCAAATTGCTGGTCTTAGCCTTCACAACTCAAAGTCAACTAAGTAA  
CCGCTCAAACAGTTAAGGTGCTGCTTCTTTTGGGAAGCATTGAAGCACAACTCTTAACAGAAATGTTAGCAACGGTCTG  
CA

BPB-6109

TGCAGACCGTTGCTAACATTTCTGTTAAGAGTTGTGCTTCAATGCTTCCCAAAAAGAAGCAGCACCTTAACTGTTTGAGC  
GGTTACTTAGTTGACTTTGAGTTGTGAAGGCTAAGACCAGCAATTTGCATTGGACTACTGGGCAGCAGCAGGTTAAAAAC  
ACATGATAGTAATTGTATGTGTGCTATGGGAAAATGAAACATGTGTACTGAACTTTTTACTCCTAAGCAGCACTAGGAGT  
AAGACCTACCGATCCTGCATATGCTTTCGTTTTTCGCTTGACGTCAATTTGGCTATGGCTGTTGTTTGTGTTGGGCCGTCTGAA  
CACACGGAATCACTGCCACTGACGCTAACAACCGCATCGGGATCCGATGATAGCGCAATTCATAAAGAGCGGTGTCATC  
AATTGAGTGTAGTTTTCTGTAGTCGTCCTTCAAAAATTTGTAGCAACACGACAGCTGGGAAAGCACAAAGCATAGGCATGT  
TGTTTAGCAAAAAGATTGCAACACCATAGATGTGACCAAAGACATTGAGCAAAAAGACATTGCCACACCATGCACATACAG  
ATGCTACAAGTAGTGGTATCTTTTGGTATAAAGCCGGCCTGTGAAGACTGAATAAGTAATACATTTTGTGAGTATGCTG  
CA

BPB-8103

TGCAGACCGTTGCTAACATTTCTGTTAAGAGTTGTGCTTCAATGCTTCCCAAAAAGAAGCAGCACCTTAACTGTTTGAGC  
GGTTACTTAGTTGACTTTGAGTTGTGAAGGCTAAGACCAGCAATTTGCATTGGACTACTGGGCAGCAGCAGGTTAAAAAC  
ACATGATAGTAATTGTATGTGTGCTATGGGAAAATGAAACATGTGTACTGAACTTTTTACTCCTAAGCAGCACTAGGAGT  
AAGACCTACCGATCCTGCATATGCTTTCGTTTTTCGCTTGACGTCAATTTGGCTATGGCTGNTGNTTGGGCCGNCCTGAA  
CACACGGAATCACTGCCACTGACG

BPB-49307

BPB-2678

BPB-8558

TGCAGATGATAATCAGCTCAAATTTGGATTCTCCCTTTAAATTGAAGTTGGCCTATTTCCCTTCTAGCAAACCTTGGACCT  
CAGTTTCCCTTTGTGGCTTAAAGGGCAGGGAAATATCAGTTATCTTGACATTTCTAATGCAGACATAGTTGACCAACTCCC  
AGATTGGTTTTTGGGATGTGTTTTCAAATATTCAGTATCTGAACATCTCTTGTAATCAAATCAGTGGCTGGTTACCGAGTA  
CGTTGGAATTCATGTCTTCAGATGCGGGTATCATATTTGACCTCAGCTTCAACAACGTCACTGGTGTGTTTACCTCAGTTA  
CCAAGGCATTTGGTCAACTTGACATTTCCAGAAACTCATTATCAGGGCCACTACCACAAAATTTTGGAGCTCCATTCCCT  
TGGTGATTTGTTGCTTTCAGAGAACAGTATCAATGGCACTACTCCCATACATATCTGTGAGCTGCA

BPB-0714

TGCAGATGATAATCAGCTCAAATTTGGATTCTCCCTTTAAATTGAAGTTGGCCTATTTCCCTTCTAGCAAACCTTGGACCT  
CAGTTTCCCTTTGTGGCTTAAAGGGCAGGGAAATATCAGTTATCTTGACATTTCTAATGCAGACATAGTTGACCAACTCCC  
AGATTGGTTTTTGGGATGTGTTTTCAAATATTCAGTATCTGAACATCTCTTGTAATCAAATCAGTGGCTGGTTACCGAGTA  
CGTTGGAATTCATGTCTTCAGATGCGGGTATCATATTTGACCTCAGCTTCAACAACGTCACTGGTGTGTTTACCTCAGTTA

CCAAGGCATTTGGTCGAACTTGACATTTCCAGAACTCATTATCAGGGCCACTACCACAAAATTTTGGAGCTCCATTCCCT  
TGGTGATTTGTTGCTTTCAGAGAACAGTATCAATGGCACTATTCCCATACATATCTGTGAGCTGCA

BPB-1645

CCAGTGCAGCTGTGGCACGCACGGTGTGTACCACAGAGCAAAAGGATTGCGGAGCAAAGTGACTCACTCGAGTGACAACT  
TCTATGCTTCTACTCCCTCAGTTTTTAAATATAAGACCTTTTAGAGATTTTATTATAGATTAGATACAAAGTAAAATGAG  
TGAACCTACATCTTAAAATAAATGTATGTAGTTCATAGTAAAAATCTCTAAAAGGTCTTATACTTCATTTAGGAACGGAT  
GTAGTATATATTAACCTAGGAGAAGCATGCCAAGGATGAAGATACGGGCCACCAGTCGACCGCATGCCATACTATGTTAC  
CTACAAGACTCAACCCTTACACATACAGATGAACTGACACGGTCTTGCCTAAACAAAGGGCAGTGATGACTAAGCAAAT  
ATCGTTGAAAGTCTGAGATAAATTTAAAAATAATGCAAGCATCAATGTTAAATTTAGGACTTGATTAAATTTAGGACTTG  
AGCCCTGACGAGATGAGGATATCACTATTTCTTAACCATCCAACCACATTTGCTGCTTCGTAGAAGTTGTATTCGATTTA  
ATGCTTGGAGGGGCTCACTTTCTGCTGCCGGTGGCGGCAAGAATGCCACGAGGAGCAACAGCAGCGCCAGGATGGCGGCGA  
GGAGGGGGGAGGCCGCCATCTCTTCCCGTCACTCCCTGCACTGGATCCNTCNAGGGGGCAATTTCTGCAGATATCCNTCNN  
NNNTGGCNGNNCTCGAGCATGCATCTAGAGGGCCCAATTCGCCCTATAGTGAGTCGTATTA

BPB-2191

TGCAGATCTTCTCCGTCGAGGTCACGGAGCTCAGCGGGGGCCTCCAGTGGCCGCTCGAGGTCTACGGCGTGGTCGCCACC  
CGAGACTCGGTGGACCATAATCGCAACGTCATCTTCAGGCGCAGGAGGGACGCCTCCCTCGTCCCTACCCAACAGGTTTG  
TTTTTCTCTCAACCATCATCTGTAGACTGTAGCTGACATTTGGTGTGGTATTCTGTTTTCCGGATGCAATCGGTTGAAGT  
TCATCTGTTAACGTGTGCAACTGCTGACTGCA

BPB-4312

TGCAGCATGTCAGAACAAATGTATAGCCTGAGGCAGAGGTAGTGATCTGTGTTTCATGGGAAGAAATCCGTAGTATGGGACT  
GGGAGTGGGGAAACGTGGTTGGTTACACAGGCTTCTGGCCCTAGCGCAATAATCATCTGGGTCGTTAGGATTAGTTTAC  
CTTATAATACTAGGGAGCTGTTTGGCAGCCCTCCACGGAGCGGAGCGCGCTGTTAATTAACAGCTCCGCAAAATATTGCT  
GGATGCGCGCGGACTCCGCTCCAACGCGCAGTAAATTGACAGAAACCGCACTAACAATATGCCATTTGTGTGTTGCAGG  
CCCCGCTATACGTGGACACGAAGATGGTTATGAGCATGGTAACGTGGGGAGGCTCTGTGTCACAGGTGATCATGCCAACA  
CCAGACGCGTACGCCAGTGCGGGGGCAAGCTGGATCGGGCACTGCCGCCCGGTCTGCCCTGCCCAACTTGGGGCCACCGACT  
GCA

BPB-7382

TGCAGAGATGGAACACGGATAATTTNNGGTGATGAAACTAANTGCGGAGATTAATACACCTATGATGGCATAACAGATTT  
ACACTCTTTGAATTCTCTTAGGTGCCCAAAACACTCGGACGGTGGGAGTTGCTAGTTACAAAAAAATGATGTATTTATT  
AATATTGATCGATCTATTTTGGAAATAACGCAAAATTCAGTTTAGTACAAAAAATGCAACTTGCACGTTTAAAGAAAGAATTG  
TAGCTGCATGTAGTGTGCATATTAGAAGAAAAAATTCAATCAACTGGTGGACCTAACAATAAATGCATATTGCACGTATG  
CCCTTTGTGGTTAAACAGTGCAAGCATTTGATGCTAGCCGCTCCATGCCACGCCCACCTTCTCACACAATCCCTTTGCTTCT  
TCGTTATAAATATGTGTTTCAGCAATCTAAGCACGAAATATAAGGCTCTCAATTTTCTCTTATTGATTCATCTACAATTTT  
TCAAGCCGTTCCGGCCACCACCGCCGCCATGGTACCCCTCTTAATTTTCTGTGCGTAGCTACAGTAACCACACTCCCTATA  
CCTCATGAGCCGTTACGCACGGTATACCTTGTGTGATTATGCGTGCTTTCGGTCTCACTCGAACTACCGCATCAGCAAGG  
CTGAATGGATTGAGAACATTCACCACTCCCGGTCTGACGACGACAGCGGCAAGCATCGCTTCCTGACCCGTATTTCTGAA  
CGGTACGGCTTGGTGATGAGACCTACCTCCACCTTACCATCATCATATCCCGCCGTATTATTATTTAAGTGAAGCCCG  
TGCTGAGGCTGAGTTGCTATCTTACGACCATAGATGATTTGCTCCTGAAGACGTGTATCGACCTTGATGCAATCGCCA  
TACTCGTCGTGAACTGCA

BPB-8660

TGCAGTCGGTGGCCCAAGTTGGGCAGGCAGACCGGGGGCGAGTGCCCGATCCAGCTTGCCCCCGCACTGGCGGTACGCGTC  
TGGTGTGGCATGATCACCTGTGACACAGAGCCTCCCCACGTTACCATGCTCATAACCATCTTCGTGTCCACGTATAGCG  
GGCCCTGCAACACACAAATGGCATATTGTTAGTGCGGTTTTCTGTCAATTTACTGCGCGTTGGAGCGGAGTCGCGCGCGCA  
TCCAGCAATATTTTGGGAGCTGTTAATTAACAGCGCGCTCCGCTCCGTGGAGGGCTGCCAAACAGCTCCCTAGTATTAT  
AAGGTAAACTAATCCTAACGACCCAGATGATTATTGCGCTAGGGCCAGAAGCCTGTGTAACCAACCACGTTTCCCCACTC  
CCCAGTCCCATACTACGGATTTCTTCCCATGAACACAGATCACTACCTCTGCCTCAGGCTATACATTGTTCTGACATGCT  
GCA

BPB-6747

TGCAGTTCACGACGAGTATGGCGATTGCATCAAGGTTCGATACACGTCTTCAGGAGCAAATCATCTATGGTCGTGAAGATA  
GACAACTCAGCCTCAGCACGGGCTTCACTTAAATAATAATACGGCGGGATATGATGATGGTAAGGTGGGAGGTAGGTCTC  
ATCACCAGGCCCTGACCGTTCAAGAAATACGGGTGAGGAAGCGATGCTTGGCGCTGTGCTCGTACGACCGGGAGTGGTGAA  
TGTTCTCAATCCATTACGCTTGTGATGCGGTAGTTTCGAGTGAGGGCCGAAAGCACGCATAATCAACAAGGTATACAGTG

CGTGAACGGCTCATGAGGTATAGGAGTGTGGTTACTGTAGCTACGCACAGAAAAATTAAGAGGGTACCATGGCGGCGGTG  
GTGGCCGGAACGGCTTAAAAAATTGTAGATGAATCAATAAGAGAAAAATTGAGAGCCTTATATTTTCGTGCTTAGATTGCTG  
AACACATATTATAACGAAGAAGCAAAGGATTGTGTGAGAAGTGGGCGTGGGCATGGAGCGGCTAGCATCAATGCCTGCAC  
TGTTTAACCACAAAGGGCATACGTGCAATATGCATTATTGTTAGNTCCACCAGTTGATTGAATTTTTTCTTCTAATATGC  
ACATTACATGCAGCTACAATTCNTCTTAAACGTGCAAGTTGCANNNTTGTACTAAACTGAANNNGCGTTATTCCAAAA  
TAGATCGATCAATATTAATAAAATACATCATTTTTTTTTGTAAC TAGCAACTCCACCGTCCGAGTGT TTTGGGCACCTAAG  
AGAATTCAAAGAGTGTAATCGTGTATGCCATCATAGGTGTATTAATCTCCGCAATTAGTTTTCATCACCCAAAAATTATCC  
GTGTTCCATCTCTGCACTGGA

BPB-2533

TGCAGGACTATGCCTAGGCCTATCAAGAAACAACTGGCCTGATTATTTTACCATGAAGAAGCAACATGGCACC GCGAAA  
CTGCCCAGTAGAGGACCATGAAACATGTGGAAAACAAAGGATAACTTTTTTGCATGGACATCTAAGAGAACTCTAAAA  
TGATTCTTACCATTGGCCCAGCAACTTCATCAGCCTTTTCTTTGCCATACAGTTGTTCAACCAAAACAATAGAATACTCC  
ATGGTTGTTCCGTGTCACGGCTAGTCACACAATCCCATCAATCTGTAACCTTGATTCTACAGCTTGCACCTCTGAAGG  
AAGTTTGTTCATGCACGGCGGATGACAGGTGTCCTATCACAAACACTCAAATGAGCTGATAATACAAAGCATACAGAAAA  
TGAATAATGGGTAAAATTGTAACCTTTAATACATTGAGCAAACCCCAAGCTCCAGTGCCACAGCTGGTGCAGCACATAC  
TGCA

BPB-5852

GGGCCCCCTAGATGCATGCTCGAGCGGCCGCCANTGTGATGGATATCTGCAGAATTCNCCCTTGATGGATCCNNNNNNNN  
NNNNNNNNNNNNNNNNNNNNNNNNNNNNNNNNNNNNNNNNNNNNNNNNNNNNNNNNNNNNNNNNNNNNNNNNNNNNNN  
TGGGGTTTGTCTCAATGTATTAAGGTTACAATTTTACCATTATTCATTTTCTGTATGCTTTGTATTATCAGCTCATTTG  
AGTGT TTTGTGATAGGCAACCTGTCATCCGCCGTGCATGAACAAACTTCCTTCAGAGGTGCAAGCTGTAGAATCAAGGTTA  
CAGATTGATGGGAATTGTGTGACTAGCCGTGGGACAGGAACAACCATGGAGTATTCATTGTTTTGGTTGAACAACCTGTA  
TGGCAAAAGAAAAGGCTGATGAAGTTGCTGGGCCAATGGTAAGAATCATTTTTTAGAGTTCTCTTAGATGTCCATTGCAAAA  
AAGTTATCCTTTGTTTTCCACATGTTTCATGGTCCTCTACTGGGCAGTTTCGCGGTGCCATGTTGCTTCTTCATGGTGAA  
ATAATCAGGCCAGTTTGT TTTCTTGATAGGCCTAGGCATAGTCCTGCA

BPB-2373

TGCAGCTTATCTTCTTAGAGGGAGATAGGCCAGAGTCGGGGAGAAGTGAGACACGCGAGGCCCTCCGCGTCGTTCCGCTG  
ATCCCGGGGTACGAGCGCATTTCTGGATCTAAGAGGAATATGCCATTCTAGGGAAGGAGTGGGTTCTGGTTCCCTCGACGAG  
ACGAAACACGAGAATGACCCCTAGGAACGGAAAGTACCCGTTATATTCATCCGATGATCTGAACCAAAAAGATCAAAAT  
GATCATCCGTTGAGAAAAGGATCACCCTAAGATGATCATCTCATGGCTATTGGAAATGAATCAAATTAGATGGTTCTATT  
TCTCAACCTTTCTGACCTGCTCCTATGGAACCAAGGTCGAAAGGATTGGAAGGATTCATTCTCACAAGGACTCATGAAG  
GGTTCCCTCAAAAAGGTAAGGATTAGTAGTTCTTTTTTGACATCGATTTTCAGAAATGAATGGATTCCGGTCCGTGTCATACA  
TACCGAAATCTCCCACTTGAAGACTATGCCGTGAAAAGCCATGTATTTAGTTGTAATGAATGGAGAAGCTAGCTAGGTA  
GCTACCAGCTAATTATATTGTTAAACCATGTGCCCTCATATGACATTAGGCAACTGTTGGGAGAGGAGCTATCTGGTACC  
ACTGTTCAAGATCTGCA

BPB-9181

CTCGGANCCNCTAGTAACGGCCGCCAGTGTGCTGGAATTCGCCCTTTTCGTAGACTGCGTATCCGGATCCAGTGCAGCTAT  
GGCAGTTTAGGCAGCTACCGCTTTGGTTGGGTTCCGGTCCCTGTCTCACATG

BPB-4646

TGCAGCTATGGCAGTTTAGGCAGCTACCGCTTTGGTTGGGTTCCGGTCCCTGTCTCACATGTTGGTGTATGGCCGATGAG  
ACGTTTCCATCTGGGAAGGTCCAAGTGAGACTCTGGCATCCTTTTCAGTGAATGAAAAACAGTAAAAAGACCCAATAAGAA  
ACACTGAGCATCTCGGCAAAGGAACCTAAATATTTGCCAACTGATCTCACAAAGTAACCGAAAGTTAATTGTAGTGCAAG  
TCTGTAACGTGTACAATATGTCAATATCCAGCTTCTTGAACGTGCCGGACGTATAGTTTTGCACAATATTTTCAATTTGCGTT  
GATGCAATTTTTTTCAGCCCTTGGTTAAAACCTAAAAGGCAGAATAGACACACAAGTTCAACTGCA

BPB-4541

TGCAGTTAAATGTGAACCCCCACCGGCCATCTGAAGATAATTATTTCCATTTGCCGGATAAGGGACATTTGCTGAATAGT  
TTGGCATAGCCATGGGTGGGACATAAACTGGAGAATACAGAGGATGTCGATATGGCATGAAATTCGGATAATGCTGCACA  
TGCAATTGGAGGGTACATCTGTGCTGCTTGTGTTGCTGGGACATATGTTGCTGTTGTGTAGACATTGCAATAGGGCTGCT  
GCTCGCAAGCTGTGAACCTTAGAGCCTGCAAAAACACAACAGGTGAAAGATACCATGAGATAACAGTACTTGCATCAAGA  
GATGAGTTGCTGGGCTTGCTTGGCACATGATAGGGGAGAAAGTCAGTGGGTTAGTTATTTTTTCTTCCCTCCGTGAAGCA  
CAGCCACCAACATATACTCCCTCCGTTACAAAATATAAGATGTTCTAACTTTTTTCTGAATCGGACATATATAGACACA

TTT TAGTATGTT CGTTCAC TCATTT CAGTCC ATACGT AACCAT ATTGAA ATATCC AAAACAT CTTATAT TTTCTGA AC GGA  
GGGAGTACCTATCCCGCCCCCAATGTTCCAGATCTGCTGGGGCCACTTCACTATTCCTGCA

**Supplemental Figure S1.** The sequences of the relevant DArT makers that are associated with the QTLs in RIL population derived from the cross between Xena X H94061120.
